# Supplementary material for: The impact of PIT tags on the growth and survival of pythons is insignificant in randomised controlled trial
Source: PeerJ. 2021 Jun 30;9:e11531. doi: 10.7717/peerj.11531 (PMC8254472; doi:10.7717/peerj.11531)
Supplement: Supplemental Information 2 [file peerj-09-11531-s002.xlsx]

## Sheet: Time_05_long
dob	clutch_id	scale_id	sex_t0	tagged	tagger_id	tag_location	pen_id_t0	sample	date_	weight_t	length_t	bmi_t	svl_diff_p	w_diff_p	sgr_svl_p	sgr_w_p	w_diff_tot	svl_diff_tot	sgr_w_tot	sgr_svl_tot	days_survived	event1	event2	dod	date_p	mort_p	p	day_tot	mort_tot	time_end
2018-05-20	1	1	m	Y	Kien	Neck upper	1	0	2018-05-28	99	64	0.463716									55	1	0	2018-07-14				376	1	2018-07-14
2018-05-20	1	1	m	Y	Kien	Neck upper	1	1	2018-07-31												55	1	0	2018-07-14	2018-07-14	1	64	376	1	2018-07-14
2018-05-20	1	1	m	Y	Kien	Neck upper	1	2	2018-09-30												55	1	0	2018-07-14		0	61	376	1	2018-07-14
2018-05-20	1	1	m	Y	Kien	Neck upper	1	3	2018-12-25												55	1	0	2018-07-14		0	86	376	1	2018-07-14
2018-05-20	1	1	m	Y	Kien	Neck upper	1	4	2019-03-07												55	1	0	2018-07-14		0	72	376	1	2018-07-14
2018-05-20	1	1	m	Y	Kien	Neck upper	1	5	2019-06-08												55	1	0	2018-07-14		0	93	376	1	2018-07-14
2018-05-20	1	2	f	N	0	-	1	0	2018-05-28	125	69	0.451328									373	1	0	2019-05-28				376	1	2019-05-28
2018-05-20	1	2	f	N	0	-	1	1	2018-07-31	387	90	0.557227	21	262	0.0290613	0.123606					373	1	0	2019-05-28		0	64	376	1	2019-05-28
2018-05-20	1	2	f	N	0	-	1	2	2018-09-30	1419	135	0.502374	45	1032	0.0465288	0.149098					373	1	0	2019-05-28		0	61	376	1	2019-05-28
2018-05-20	1	2	f	N	0	-	1	3	2018-12-25	3300	165	0.583471	30	1881	0.0163337	0.0686952					373	1	0	2019-05-28		0	86	376	1	2019-05-28
2018-05-20	1	2	f	N	0	-	1	4	2019-03-07	4300	195	0.426529	30	1000	0.0162414	0.025734					373	1	0	2019-05-28		0	72	376	1	2019-05-28
2018-05-20	1	2	f	N	0	-	1	5	2019-06-08												373	1	0	2019-05-28	2019-05-28	1	93	376	1	2019-05-28
2018-05-20	1	3	f	Y	Kien	Neck upper	1	0	2018-05-28	123	60	0.720281					7077	165	0.0757648	0.0246072	385	0	1					376	0	2019-06-08
2018-05-20	1	3	f	Y	Kien	Neck upper	1	1	2018-07-31	383	96	0.441103	36	260	0.0514066	0.124234	7077	165	0.0757648	0.0246072	385	0	1			0	64	376	0	2019-06-08
2018-05-20	1	3	f	Y	Kien	Neck upper	1	2	2018-09-30	1580	136	0.545271	40	1197	0.0399696	0.162623	7077	165	0.0757648	0.0246072	385	0	1			0	61	376	0	2019-06-08
2018-05-20	1	3	f	Y	Kien	Neck upper	1	3	2018-12-25	4000	180	0.52338	44	2420	0.0228153	0.0756057	7077	165	0.0757648	0.0246072	385	0	1			0	86	376	0	2019-06-08
2018-05-20	1	3	f	Y	Kien	Neck upper	1	4	2019-03-07	4600	200	0.418017	20	600	0.0102434	0.013588	7077	165	0.0757648	0.0246072	385	0	1			0	72	376	0	2019-06-08
2018-05-20	1	3	f	Y	Kien	Neck upper	1	5	2019-06-08	7200	225	0.435292	25	2600	0.0088654	0.0337223	7077	165	0.0757648	0.0246072	385	0	1			0	93	376	0	2019-06-08
2018-05-20	1	4	f	N	0	-	1	0	2018-05-28	126	68	0.478509									315	1	0	2019-03-31				376	1	2019-03-31
2018-05-20	1	4	f	N	0	-	1	1	2018-07-31	315	84	0.575843	16	189	0.0231119	0.100219					315	1	0	2019-03-31		0	64	376	1	2019-03-31
2018-05-20	1	4	f	N	0	-	1	2	2018-09-30	785	110	0.564483	26	470	0.030945	0.104783					315	1	0	2019-03-31		0	61	376	1	2019-03-31
2018-05-20	1	4	f	N	0	-	1	3	2018-12-25	1700	137	0.572	27	915	0.0178663	0.0628942					315	1	0	2019-03-31		0	86	376	1	2019-03-31
2018-05-20	1	4	f	N	0	-	1	4	2019-03-07	1400	140	0.437044	3	-300	0.002106	-0.0188763					315	1	0	2019-03-31		0	72	376	1	2019-03-31
2018-05-20	1	4	f	N	0	-	1	5	2019-06-08												315	1	0	2019-03-31	2019-03-31	1	93	376	1	2019-03-31
2018-05-20	1	5	f	Y	Kien	Neck upper	1	0	2018-05-28	107	65	0.475011					3493	125	0.0654548	0.0199693	384	0	1					376	0	2019-06-08
2018-05-20	1	5	f	Y	Kien	Neck upper	1	1	2018-07-31	190	68	0.721561	3	83	0.004935	0.0628026	3493	125	0.0654548	0.0199693	384	0	1			0	64	376	0	2019-06-08
2018-05-20	1	5	f	Y	Kien	Neck upper	1	2	2018-09-30	776	100	0.776	32	586	0.0442564	0.161474	3493	125	0.0654548	0.0199693	384	0	1			0	61	376	0	2019-06-08
2018-05-20	1	5	f	Y	Kien	Neck upper	1	3	2018-12-25	2900	158	0.595723	58	2124	0.0372323	0.107305	3493	125	0.0654548	0.0199693	384	0	1			0	86	376	0	2019-06-08
2018-05-20	1	5	f	Y	Kien	Neck upper	1	4	2019-03-07	4200	185	0.499845	27	1300	0.0153379	0.0360086	3493	125	0.0654548	0.0199693	384	0	1			0	72	376	0	2019-06-08
2018-05-20	1	5	f	Y	Kien	Neck upper	1	5	2019-06-08	3600	190	0.390674	5	-600	0.0020073	-0.0116027	3493	125	0.0654548	0.0199693	384	0	1			0	93	376	0	2019-06-08
2018-05-20	1	6	f	N	0	-	1	0	2018-05-28	89	63	0.440222					6911	157	0.0812638	0.0232805	384	0	1					376	0	2019-06-08
2018-05-20	1	6	f	N	0	-	1	1	2018-07-31	399	90	0.574505	27	310	0.0390113	0.164098	6911	157	0.0812638	0.0232805	384	0	1			0	64	376	0	2019-06-08
2018-05-20	1	6	f	N	0	-	1	2	2018-09-30	1230	127	0.537953	37	831	0.0395187	0.129191	6911	157	0.0812638	0.0232805	384	0	1			0	61	376	0	2019-06-08
2018-05-20	1	6	f	N	0	-	1	3	2018-12-25	3200	162	0.602876	35	1970	0.0198124	0.0778251	6911	157	0.0812638	0.0232805	384	0	1			0	86	376	0	2019-06-08
2018-05-20	1	6	f	N	0	-	1	4	2019-03-07	4200	190	0.455787	28	1000	0.0154999	0.026438	6911	157	0.0812638	0.0232805	384	0	1			0	72	376	0	2019-06-08
2018-05-20	1	6	f	N	0	-	1	5	2019-06-08	7000	220	0.45742	30	2800	0.0110347	0.0384492	6911	157	0.0812638	0.0232805	384	0	1			0	93	376	0	2019-06-08
2018-05-20	1	7	m	Y	Kien	Neck upper	1	0	2018-05-28	123	69	0.444107					9377	171	0.0809256	0.0232067	384	0	1					376	0	2019-06-08
2018-05-20	1	7	m	Y	Kien	Neck upper	1	1	2018-07-31	321	86	0.540929	17	198	0.0240888	0.104919	9377	171	0.0809256	0.0232067	384	0	1			0	64	376	0	2019-06-08
2018-05-20	1	7	m	Y	Kien	Neck upper	1	2	2018-09-30	1018	119	0.557642	33	697	0.0372694	0.132444	9377	171	0.0809256	0.0232067	384	0	1			0	61	376	0	2019-06-08
2018-05-20	1	7	m	Y	Kien	Neck upper	1	3	2018-12-25	3400	170	0.542158	51	2382	0.0290317	0.0981575	9377	171	0.0809256	0.0232067	384	0	1			0	86	376	0	2019-06-08
2018-05-20	1	7	m	Y	Kien	Neck upper	1	4	2019-03-07	4400	195	0.436448	25	1000	0.013339	0.0250667	9377	171	0.0809256	0.0232067	384	0	1			0	72	376	0	2019-06-08
2018-05-20	1	7	m	Y	Kien	Neck upper	1	5	2019-06-08	9500	240	0.459402	45	5100	0.0156288	0.0579334	9377	171	0.0809256	0.0232067	384	0	1			0	93	376	0	2019-06-08
2018-05-20	1	8	f	N	0	-	1	0	2018-05-28	131	69	0.472992					7669	161	0.0760818	0.0224144	384	0	1					376	0	2019-06-08
2018-05-20	1	8	f	N	0	-	1	1	2018-07-31	462	94	0.572295	25	331	0.0338175	0.137853	7669	161	0.0760818	0.0224144	384	0	1			0	64	376	0	2019-06-08
2018-05-20	1	8	f	N	0	-	1	2	2018-09-30	1667	136	0.575295	42	1205	0.0423856	0.147254	7669	161	0.0760818	0.0224144	384	0	1			0	61	376	0	2019-06-08
2018-05-20	1	8	f	N	0	-	1	3	2018-12-25	2200	146	0.593966	10	533	0.0057751	0.0225817	7669	161	0.0760818	0.0224144	384	0	1			0	86	376	0	2019-06-08
2018-05-20	1	8	f	N	0	-	1	4	2019-03-07	3200	180	0.418704	34	1000	0.0203535	0.0364285	7669	161	0.0760818	0.0224144	384	0	1			0	72	376	0	2019-06-08
2018-05-20	1	8	f	N	0	-	1	5	2019-06-08	7800	230	0.437035	50	4600	0.0184501	0.0670625	7669	161	0.0760818	0.0224144	384	0	1			0	93	376	0	2019-06-08
2018-05-20	1	9	f	Y	Kien	Neck upper	1	0	2018-05-28	116	66	0.488468									296	1	0	2019-03-12				376	1	2019-03-12
2018-05-20	1	9	f	Y	Kien	Neck upper	1	1	2018-07-31	268	90	0.385883	24	152	0.0339232	0.0915903					296	1	0	2019-03-12		0	64	376	1	2019-03-12
2018-05-20	1	9	f	Y	Kien	Neck upper	1	2	2018-09-30	1447	132	0.55371	42	1179	0.0439499	0.193505					296	1	0	2019-03-12		0	61	376	1	2019-03-12
2018-05-20	1	9	f	Y	Kien	Neck upper	1	3	2018-12-25	1400	142	0.416112	10	-47	0.0059439	-0.0026877					296	1	0	2019-03-12		0	86	376	1	2019-03-12
2018-05-20	1	9	f	Y	Kien	Neck upper	1	4	2019-03-07	1500	145	0.414723	3	100	0.0020326	0.0067076					296	1	0	2019-03-12		0	72	376	1	2019-03-12
2018-05-20	1	9	f	Y	Kien	Neck upper	1	5	2019-06-08												296	1	0	2019-03-12	2019-03-12	1	93	376	1	2019-03-12
2018-05-20	1	10	m	N	0	-	1	0	2018-05-28	99	65	0.439496					4401	125	0.0710558	0.0199693	384	0	1					376	0	2019-06-08
2018-05-20	1	10	m	N	0	-	1	1	2018-07-31	428	91	0.593144	26	329	0.0368017	0.160125	4401	125	0.0710558	0.0199693	384	0	1			0	64	376	0	2019-06-08
2018-05-20	1	10	m	N	0	-	1	2	2018-09-30	626	101	0.604815	10	198	0.0119644	0.0436326	4401	125	0.0710558	0.0199693	384	0	1			0	61	376	0	2019-06-08
2018-05-20	1	10	m	N	0	-	1	3	2018-12-25	2400	159	0.482367	58	1774	0.0369359	0.109385	4401	125	0.0710558	0.0199693	384	0	1			0	86	376	0	2019-06-08
2018-05-20	1	10	m	N	0	-	1	4	2019-03-07	3000	185	0.357032	26	600	0.0147245	0.0216945	4401	125	0.0710558	0.0199693	384	0	1			0	72	376	0	2019-06-08
2018-05-20	1	10	m	N	0	-	1	5	2019-06-08	4500	190	0.488343	5	1500	0.0020073	0.0305189	4401	125	0.0710558	0.0199693	384	0	1			0	93	376	0	2019-06-08
2018-05-20	1	11	f	Y	Kien	Neck upper	1	0	2018-05-28	83	58	0.546534					8117	177	0.0855089	0.0260479	385	0	1					376	0	2019-06-08
2018-05-20	1	11	f	Y	Kien	Neck upper	1	1	2018-07-31	353	94	0.437273	36	270	0.0528119	0.158334	8117	177	0.0855089	0.0260479	385	0	1			0	64	376	0	2019-06-08
2018-05-20	1	11	f	Y	Kien	Neck upper	1	2	2018-09-30	1093	120	0.581638	26	740	0.0280226	0.129697	8117	177	0.0855089	0.0260479	385	0	1			0	61	376	0	2019-06-08
2018-05-20	1	11	f	Y	Kien	Neck upper	1	3	2018-12-25	3400	163	0.627061	43	2307	0.024928	0.0923714	8117	177	0.0855089	0.0260479	385	0	1			0	86	376	0	2019-06-08
2018-05-20	1	11	f	Y	Kien	Neck upper	1	4	2019-03-07	4300	200	0.390755	37	900	0.0198885	0.0228316	8117	177	0.0855089	0.0260479	385	0	1			0	72	376	0	2019-06-08
2018-05-20	1	11	f	Y	Kien	Neck upper	1	5	2019-06-08	8200	235	0.4265	35	3900	0.0121385	0.0485875	8117	177	0.0855089	0.0260479	385	0	1			0	93	376	0	2019-06-08
2018-05-20	1	12	m	N	0	-	1	0	2018-05-28	89	58	0.586043									60	1	0	2018-07-19				376	1	2018-07-19
2018-05-20	1	12	m	N	0	-	1	1	2018-07-31												60	1	0	2018-07-19	2018-07-19	1	64	376	1	2018-07-19
2018-05-20	1	12	m	N	0	-	1	2	2018-09-30												60	1	0	2018-07-19		0	61	376	1	2018-07-19
2018-05-20	1	12	m	N	0	-	1	3	2018-12-25												60	1	0	2018-07-19		0	86	376	1	2018-07-19
2018-05-20	1	12	m	N	0	-	1	4	2019-03-07												60	1	0	2018-07-19		0	72	376	1	2018-07-19
2018-05-20	1	12	m	N	0	-	1	5	2019-06-08												60	1	0	2018-07-19		0	93	376	1	2018-07-19
2018-05-20	1	13	m	Y	Kien	Neck lateral	1	0	2018-05-28	110	67	0.439718					8390	173	0.0809345	0.0237543	386	0	1					376	0	2019-06-08
2018-05-20	1	13	m	Y	Kien	Neck lateral	1	1	2018-07-31	283	86	0.476894	19	173	0.027306	0.103356	8390	173	0.0809345	0.0237543	386	0	1			0	64	376	0	2019-06-08
2018-05-20	1	13	m	Y	Kien	Neck lateral	1	2	2018-09-30	1025	117	0.595389	31	742	0.0353244	0.147689	8390	173	0.0809345	0.0237543	386	0	1			0	61	376	0	2019-06-08
2018-05-20	1	13	m	Y	Kien	Neck lateral	1	3	2018-12-25	3200	162	0.602876	45	2175	0.0264879	0.0926652	8390	173	0.0809345	0.0237543	386	0	1			0	86	376	0	2019-06-08
2018-05-20	1	13	m	Y	Kien	Neck lateral	1	4	2019-03-07	5000	210	0.383788	48	1800	0.0252303	0.043389	8390	173	0.0809345	0.0237543	386	0	1			0	72	376	0	2019-06-08
2018-05-20	1	13	m	Y	Kien	Neck lateral	1	5	2019-06-08	8500	240	0.411044	30	3500	0.0100508	0.0399398	8390	173	0.0809345	0.0237543	386	0	1			0	93	376	0	2019-06-08
2018-05-20	1	14	f	N	0	-	1	0	2018-05-28	93	61	0.51433									224	1	0	2018-12-30				376	1	2018-12-30
2018-05-20	1	14	f	N	0	-	1	1	2018-07-31	367	91	0.508608	30	274	0.0437484	0.150146					224	1	0	2018-12-30		0	64	376	1	2018-12-30
2018-05-20	1	14	f	N	0	-	1	2	2018-09-30	1235	122	0.620672	31	868	0.0336415	0.13925					224	1	0	2018-12-30		0	61	376	1	2018-12-30
2018-05-20	1	14	f	N	0	-	1	3	2018-12-25	2800	160	0.550685	38	1565	0.0220706	0.066626					224	1	0	2018-12-30		0	86	376	1	2018-12-30
2018-05-20	1	14	f	N	0	-	1	4	2019-03-07												224	1	0	2018-12-30	2018-12-30	1	72	376	1	2018-12-30
2018-05-20	1	14	f	N	0	-	1	5	2019-06-08												224	1	0	2018-12-30		0	93	376	1	2018-12-30
2018-05-20	1	15	m	Y	Kien	Neck upper	1	0	2018-05-28	95	66	0.400038					8205	169	0.0832206	0.0236423	384	0	1					376	0	2019-06-08
2018-05-20	1	15	m	Y	Kien	Neck upper	1	1	2018-07-31	153	84	0.279695	18	58	0.0263771	0.0521239	8205	169	0.0832206	0.0236423	384	0	1			0	64	376	0	2019-06-08
2018-05-20	1	15	m	Y	Kien	Neck upper	1	2	2018-09-30	1425	127	0.623238	43	1272	0.0474359	0.256072	8205	169	0.0832206	0.0236423	384	0	1			0	61	376	0	2019-06-08
2018-05-20	1	15	m	Y	Kien	Neck upper	1	3	2018-12-25	3200	166	0.554084	39	1775	0.0217977	0.0658471	8205	169	0.0832206	0.0236423	384	0	1			0	86	376	0	2019-06-08
2018-05-20	1	15	m	Y	Kien	Neck upper	1	4	2019-03-07	4900	195	0.486045	29	1700	0.0156539	0.0414249	8205	169	0.0832206	0.0236423	384	0	1			0	72	376	0	2019-06-08
2018-05-20	1	15	m	Y	Kien	Neck upper	1	5	2019-06-08	8300	235	0.431701	40	3400	0.0140441	0.0396682	8205	169	0.0832206	0.0236423	384	0	1			0	93	376	0	2019-06-08
2018-05-20	1	16	m	N	0	-	1	0	2018-05-28	97	62	0.507103									96	1	0	2018-08-24				376	1	2018-08-24
2018-05-20	1	16	m	N	0	-	1	1	2018-07-31	122	68	0.463318	6	25	0.0101033	0.0250808					96	1	0	2018-08-24		0	64	376	1	2018-08-24
2018-05-20	1	16	m	N	0	-	1	2	2018-09-30												96	1	0	2018-08-24	2018-08-24	1	61	376	1	2018-08-24
2018-05-20	1	16	m	N	0	-	1	3	2018-12-25												96	1	0	2018-08-24		0	86	376	1	2018-08-24
2018-05-20	1	16	m	N	0	-	1	4	2019-03-07												96	1	0	2018-08-24		0	72	376	1	2018-08-24
2018-05-20	1	16	m	N	0	-	1	5	2019-06-08												96	1	0	2018-08-24		0	93	376	1	2018-08-24
2018-05-20	1	17	f	Y	Kien	Neck upper	1	0	2018-05-28	102	61	0.564104					4098	124	0.0692156	0.0206553	384	0	1					376	0	2019-06-08
2018-05-20	1	17	f	Y	Kien	Neck upper	1	1	2018-07-31	378	95	0.451407	34	276	0.0484535	0.143273	4098	124	0.0692156	0.0206553	384	0	1			0	64	376	0	2019-06-08
2018-05-20	1	17	f	Y	Kien	Neck upper	1	2	2018-09-30	1900	128	0.808737	33	1522	0.0342143	0.185295	4098	124	0.0692156	0.0206553	384	0	1			0	61	376	0	2019-06-08
2018-05-20	1	17	f	Y	Kien	Neck upper	1	3	2018-12-25	2900	165	0.512748	37	1000	0.0206675	0.0344186	4098	124	0.0692156	0.0206553	384	0	1			0	86	376	0	2019-06-08
2018-05-20	1	17	f	Y	Kien	Neck upper	1	4	2019-03-07	3800	185	0.45224	20	900	0.0111232	0.0262782	4098	124	0.0692156	0.0206553	384	0	1			0	72	376	0	2019-06-08
2018-05-20	1	17	f	Y	Kien	Neck upper	1	5	2019-06-08	4200	185	0.499845	0	400	0	0.0075332	4098	124	0.0692156	0.0206553	384	0	1			0	93	376	0	2019-06-08
2018-05-20	1	18	f	N	0	-	1	0	2018-05-28	100	63	0.494631					12100	187	0.0894366	0.0256603	384	0	1					376	0	2019-06-08
2018-05-20	1	18	f	N	0	-	1	1	2018-07-31	354	91	0.490592	28	254	0.0402199	0.138264	12100	187	0.0894366	0.0256603	384	0	1			0	64	376	0	2019-06-08
2018-05-20	1	18	f	N	0	-	1	2	2018-09-30	1415	126	0.636025	35	1061	0.0373436	0.159002	12100	187	0.0894366	0.0256603	384	0	1			0	61	376	0	2019-06-08
2018-05-20	1	18	f	N	0	-	1	3	2018-12-25								12100	187	0.0894366	0.0256603	384	0	1			0	86	376	0	2019-06-08
2018-05-20	1	18	f	N	0	-	1	4	2019-03-07	6200	210	0.475897					12100	187	0.0894366	0.0256603	384	0	1			0	72	376	0	2019-06-08
2018-05-20	1	18	f	N	0	-	1	5	2019-06-08	12200	250	0.512256	40	6000	0.0131234	0.0509485	12100	187	0.0894366	0.0256603	384	0	1			0	93	376	0	2019-06-08
2018-05-20	1	19	f	Y	Kien	Neck upper	1	0	2018-05-28	105	62	0.548926					6895	158	0.078186	0.0235783	384	0	1					376	0	2019-06-08
2018-05-20	1	19	f	Y	Kien	Neck upper	1	1	2018-07-31	456	94	0.564862	32	351	0.0455175	0.160621	6895	158	0.078186	0.0235783	384	0	1			0	64	376	0	2019-06-08
2018-05-20	1	19	f	Y	Kien	Neck upper	1	2	2018-09-30	1859	138	0.609955	44	1403	0.0440609	0.161264	6895	158	0.078186	0.0235783	384	0	1			0	61	376	0	2019-06-08
2018-05-20	1	19	f	Y	Kien	Neck upper	1	3	2018-12-25	4500	180	0.588803	42	2641	0.021627	0.0719566	6895	158	0.078186	0.0235783	384	0	1			0	86	376	0	2019-06-08
2018-05-20	1	19	f	Y	Kien	Neck upper	1	4	2019-03-07	5000	190	0.542603	10	500	0.0052565	0.0102434	6895	158	0.078186	0.0235783	384	0	1			0	72	376	0	2019-06-08
2018-05-20	1	19	f	Y	Kien	Neck upper	1	5	2019-06-08	7000	220	0.45742	30	2000	0.0110347	0.0253259	6895	158	0.078186	0.0235783	384	0	1			0	93	376	0	2019-06-08
2018-05-20	1	20	f	N	0	-	1	0	2018-05-28	101	64	0.473084					6199	151	0.0769476	0.0225593	384	0	1					376	0	2019-06-08
2018-05-20	1	20	f	N	0	-	1	1	2018-07-31	414	89	0.619599	25	313	0.0360668	0.1543	6199	151	0.0769476	0.0225593	384	0	1			0	64	376	0	2019-06-08
2018-05-20	1	20	f	N	0	-	1	2	2018-09-30	1255	126	0.564107	37	841	0.0398938	0.127265	6199	151	0.0769476	0.0225593	384	0	1			0	61	376	0	2019-06-08
2018-05-20	1	20	f	N	0	-	1	3	2018-12-25	4000	179	0.533566	53	2745	0.0285782	0.0943501	6199	151	0.0769476	0.0225593	384	0	1			0	86	376	0	2019-06-08
2018-05-20	1	20	f	N	0	-	1	4	2019-03-07	4800	195	0.476125	16	800	0.0083236	0.0177257	6199	151	0.0769476	0.0225593	384	0	1			0	72	376	0	2019-06-08
2018-05-20	1	20	f	N	0	-	1	5	2019-06-08	6300	215	0.445763	20	1500	0.0073491	0.0204681	6199	151	0.0769476	0.0225593	384	0	1			0	93	376	0	2019-06-08
2018-05-20	1	21	m	Y	Kien	Neck	1	0	2018-05-28	121	72	0.377064									228	1	0	2019-01-03				376	1	2019-01-03
2018-05-20	1	21	m	Y	Kien	Neck	1	1	2018-07-31	387	94	0.47939	22	266	0.0291625	0.127163					228	1	0	2019-01-03		0	64	376	1	2019-01-03
2018-05-20	1	21	m	Y	Kien	Neck	1	2	2018-09-30	1379	128	0.586973	34	992	0.0354287	0.145817					228	1	0	2019-01-03		0	61	376	1	2019-01-03
2018-05-20	1	21	m	Y	Kien	Neck	1	3	2018-12-25	3100	161	0.596684	33	1721	0.01867	0.0659338					228	1	0	2019-01-03		0	86	376	1	2019-01-03
2018-05-20	1	21	m	Y	Kien	Neck	1	4	2019-03-07												228	1	0	2019-01-03	2019-01-03	1	72	376	1	2019-01-03
2018-05-20	1	21	m	Y	Kien	Neck	1	5	2019-06-08												228	1	0	2019-01-03		0	93	376	1	2019-01-03
2018-05-20	1	22	m	N	0	-	1	0	2018-05-28	100	60	0.585594									323	1	0	2019-04-08				376	1	2019-04-08
2018-05-20	1	22	m	N	0	-	1	1	2018-07-31	426	91	0.590373	31	326	0.0455563	0.158514					323	1	0	2019-04-08		0	64	376	1	2019-04-08
2018-05-20	1	22	m	N	0	-	1	2	2018-09-30	1657	131	0.650974	40	1231	0.0418093	0.155873					323	1	0	2019-04-08		0	61	376	1	2019-04-08
2018-05-20	1	22	m	N	0	-	1	3	2018-12-25	2000	140	0.624348	9	343	0.0054083	0.0153136					323	1	0	2019-04-08		0	86	376	1	2019-04-08
2018-05-20	1	22	m	N	0	-	1	4	2019-03-07	1800	150	0.442585	10	-200	0.0067076	-0.0102434					323	1	0	2019-04-08		0	72	376	1	2019-04-08
2018-05-20	1	22	m	N	0	-	1	5	2019-06-08												323	1	0	2019-04-08	2019-04-08	1	93	376	1	2019-04-08
2018-05-20	1	23	f	Y	Kien	Neck	1	0	2018-05-28	124	73	0.368404									283	1	0	2019-02-27				376	1	2019-02-27
2018-05-20	1	23	f	Y	Kien	Neck	1	1	2018-07-31	375	96	0.43189	23	251	0.0299566	0.121039					283	1	0	2019-02-27		0	64	376	1	2019-02-27
2018-05-20	1	23	f	Y	Kien	Neck	1	2	2018-09-30	1382	130	0.557525	34	1007	0.0347919	0.149681					283	1	0	2019-02-27		0	61	376	1	2019-02-27
2018-05-20	1	23	f	Y	Kien	Neck	1	3	2018-12-25	1800	139	0.576025	9	418	0.0054486	0.0215091					283	1	0	2019-02-27		0	86	376	1	2019-02-27
2018-05-20	1	23	f	Y	Kien	Neck	1	4	2019-03-07												283	1	0	2019-02-27	2019-02-27	1	72	376	1	2019-02-27
2018-05-20	1	23	f	Y	Kien	Neck	1	5	2019-06-08												283	1	0	2019-02-27		0	93	376	1	2019-02-27
2018-05-20	1	24	m	N	0	-	1	0	2018-05-28	85	59	0.527559									176	1	0	2018-11-12				376	1	2018-11-12
2018-05-20	1	24	m	N	0	-	1	1	2018-07-31	295	77	0.728726	18	210	0.0291231	0.136098					176	1	0	2018-11-12		0	64	376	1	2018-11-12
2018-05-20	1	24	m	N	0	-	1	2	2018-09-30	892	108	0.683469	31	597	0.0388243	0.126974					176	1	0	2018-11-12		0	61	376	1	2018-11-12
2018-05-20	1	24	m	N	0	-	1	3	2018-12-25												176	1	0	2018-11-12	2018-11-12	1	86	376	1	2018-11-12
2018-05-20	1	24	m	N	0	-	1	4	2019-03-07												176	1	0	2018-11-12		0	72	376	1	2018-11-12
2018-05-20	1	24	m	N	0	-	1	5	2019-06-08												176	1	0	2018-11-12		0	93	376	1	2018-11-12
2018-05-20	1	25	f	Y	Kien	Neck	1	0	2018-05-28	95	68	0.36078					4405	137	0.0718236	0.0205439	385	0	1					376	0	2019-06-08
2018-05-20	1	25	f	Y	Kien	Neck	1	1	2018-07-31	469	99	0.485596	31	374	0.0410826	0.174642	4405	137	0.0718236	0.0205439	385	0	1			0	64	376	0	2019-06-08
2018-05-20	1	25	f	Y	Kien	Neck	1	2	2018-09-30	1620	135	0.573535	36	1151	0.0355916	0.142247	4405	137	0.0718236	0.0205439	385	0	1			0	61	376	0	2019-06-08
2018-05-20	1	25	f	Y	Kien	Neck	1	3	2018-12-25	3900	179	0.520227	44	2280	0.0229625	0.0715099	4405	137	0.0718236	0.0205439	385	0	1			0	86	376	0	2019-06-08
2018-05-20	1	25	f	Y	Kien	Neck	1	4	2019-03-07	4400	200	0.399842	21	500	0.010785	0.0117277	4405	137	0.0718236	0.0205439	385	0	1			0	72	376	0	2019-06-08
2018-05-20	1	25	f	Y	Kien	Neck	1	5	2019-06-08	4500	205	0.375443	5	100	0.0018586	0.0016915	4405	137	0.0718236	0.0205439	385	0	1			0	93	376	0	2019-06-08
2018-05-20	1	26	m	N	0	-	2	0	2018-05-28	93	58	0.612382					6407	157	0.0790657	0.0243919	384	0	1					376	0	2019-06-08
2018-05-20	1	26	m	N	0	-	2	1	2018-07-31	287	85	0.503608	27	194	0.041804	0.123253	6407	157	0.0790657	0.0243919	384	0	1			0	64	376	0	2019-06-08
2018-05-20	1	26	m	N	0	-	2	2	2018-09-30	1155	120	0.614632	35	868	0.0395719	0.159781	6407	157	0.0790657	0.0243919	384	0	1			0	61	376	0	2019-06-08
2018-05-20	1	26	m	N	0	-	2	3	2018-12-25	2200	148	0.566653	28	1045	0.0170703	0.0524477	6407	157	0.0790657	0.0243919	384	0	1			0	86	376	0	2019-06-08
2018-05-20	1	26	m	N	0	-	2	4	2019-03-07	5800	205	0.483905	57	3600	0.0316748	0.0942473	6407	157	0.0790657	0.0243919	384	0	1			0	72	376	0	2019-06-08
2018-05-20	1	26	m	N	0	-	2	5	2019-06-08	6500	215	0.459914	10	700	0.0035849	0.0085764	6407	157	0.0790657	0.0243919	384	0	1			0	93	376	0	2019-06-08
2018-05-20	1	27	m	Y	Kien	Neck	2	0	2018-05-28	92	60	0.538747					6708	170	0.080107	0.0250163	384	0	1					376	0	2019-06-08
2018-05-20	1	27	m	Y	Kien	Neck	2	1	2018-07-31	362	84	0.661763	24	270	0.0368017	0.149828	6708	170	0.080107	0.0250163	384	0	1			0	64	376	0	2019-06-08
2018-05-20	1	27	m	Y	Kien	Neck	2	2	2018-09-30	1145	132	0.438147	48	783	0.0518671	0.132141	6708	170	0.080107	0.0250163	384	0	1			0	61	376	0	2019-06-08
2018-05-20	1	27	m	Y	Kien	Neck	2	3	2018-12-25	3900	175	0.562539	43	2755	0.0229522	0.0997559	6708	170	0.080107	0.0250163	384	0	1			0	86	376	0	2019-06-08
2018-05-20	1	27	m	Y	Kien	Neck	2	4	2019-03-07	4800	195	0.476125	20	900	0.0105208	0.0201872	6708	170	0.080107	0.0250163	384	0	1			0	72	376	0	2019-06-08
2018-05-20	1	27	m	Y	Kien	Neck	2	5	2019-06-08	6800	230	0.381005	35	2000	0.0124254	0.0262166	6708	170	0.080107	0.0250163	384	0	1			0	93	376	0	2019-06-08
2018-05-20	2	28	f	N	0	-	2	0	2018-05-28	96	66	0.404249					9404	174	0.0855396	0.0240343	384	0	1					376	0	2019-06-08
2018-05-20	2	28	f	N	0	-	2	1	2018-07-31	358	90	0.515471	24	262	0.0339232	0.143958	9404	174	0.0855396	0.0240343	384	0	1			0	64	376	0	2019-06-08
2018-05-20	2	28	f	N	0	-	2	2	2018-09-30	1006	118	0.567396	28	648	0.031084	0.118564	9404	174	0.0855396	0.0240343	384	0	1			0	61	376	0	2019-06-08
2018-05-20	2	28	f	N	0	-	2	3	2018-12-25	3200	156	0.686972	38	2194	0.0227233	0.0941882	9404	174	0.0855396	0.0240343	384	0	1			0	86	376	0	2019-06-08
2018-05-20	2	28	f	N	0	-	2	4	2019-03-07	4500	190	0.488343	34	1300	0.0191691	0.0331456	9404	174	0.0855396	0.0240343	384	0	1			0	72	376	0	2019-06-08
2018-05-20	2	28	f	N	0	-	2	5	2019-06-08	9500	240	0.459402	50	5000	0.0175839	0.0562419	9404	174	0.0855396	0.0240343	384	0	1			0	93	376	0	2019-06-08
2018-05-20	2	29	f	Y	Kien	Neck	2	0	2018-05-28	116	72	0.361483					10684	168	0.0844042	0.0224144	386	0	1					376	0	2019-06-08
2018-05-20	2	29	f	Y	Kien	Neck	2	1	2018-07-31	382	99	0.395517	27	266	0.0348309	0.130356	10684	168	0.0844042	0.0224144	386	0	1			0	64	376	0	2019-06-08
2018-05-20	2	29	f	Y	Kien	Neck	2	2	2018-09-30	1626	137	0.547101	38	1244	0.0372791	0.166216	10684	168	0.0844042	0.0224144	386	0	1			0	61	376	0	2019-06-08
2018-05-20	2	29	f	Y	Kien	Neck	2	3	2018-12-25	3600	176	0.50913	39	1974	0.0203898	0.0646939	10684	168	0.0844042	0.0224144	386	0	1			0	86	376	0	2019-06-08
2018-05-20	2	29	f	Y	Kien	Neck	2	4	2019-03-07	5200	195	0.515803	19	1600	0.0099668	0.035751	10684	168	0.0844042	0.0224144	386	0	1			0	72	376	0	2019-06-08
2018-05-20	2	29	f	Y	Kien	Neck	2	5	2019-06-08	10800	240	0.522267	45	5600	0.0156288	0.055013	10684	168	0.0844042	0.0224144	386	0	1			0	93	376	0	2019-06-08
2018-05-20	2	30	f	N	0	-	2	0	2018-05-28	99	69	0.357452									347	1	0	2019-05-02				376	1	2019-05-02
2018-05-20	2	30	f	N	0	-	2	1	2018-07-31	358	94	0.443466	25	259	0.0338175	0.140592					347	1	0	2019-05-02		0	64	376	1	2019-05-02
2018-05-20	2	30	f	N	0	-	2	2	2018-09-30	1445	131	0.567687	37	1087	0.0380872	0.16012					347	1	0	2019-05-02		0	61	376	1	2019-05-02
2018-05-20	2	30	f	N	0	-	2	3	2018-12-25	1800	135	0.637262	4	355	0.0024482	0.0178807					347	1	0	2019-05-02		0	86	376	1	2019-05-02
2018-05-20	2	30	f	N	0	-	2	4	2019-03-07	1300	140	0.405826	5	-500	0.0035357	-0.0316383					347	1	0	2019-05-02		0	72	376	1	2019-05-02
2018-05-20	2	30	f	N	0	-	2	5	2019-06-08												347	1	0	2019-05-02	2019-05-02	1	93	376	1	2019-05-02
2018-05-20	2	31	f	Y	Kien	Neck lateral	2	0	2018-05-28	116	64	0.543345					2984	116	0.0611675	0.0192514	384	0	1					376	0	2019-06-08
2018-05-20	2	31	f	Y	Kien	Neck lateral	2	1	2018-07-31	235	80	0.5086	16	119	0.0244063	0.0772182	2984	116	0.0611675	0.0192514	384	0	1			0	64	376	0	2019-06-08
2018-05-20	2	31	f	Y	Kien	Neck lateral	2	2	2018-09-30	1278	117	0.742348	37	1043	0.0436235	0.194332	2984	116	0.0611675	0.0192514	384	0	1			0	61	376	0	2019-06-08
2018-05-20	2	31	f	Y	Kien	Neck lateral	2	3	2018-12-25	3000	161	0.577436	44	1722	0.0259839	0.069456	2984	116	0.0611675	0.0192514	384	0	1			0	86	376	0	2019-06-08
2018-05-20	2	31	f	Y	Kien	Neck lateral	2	4	2019-03-07	3800	180	0.497211	19	800	0.0108454	0.0229822	2984	116	0.0611675	0.0192514	384	0	1			0	72	376	0	2019-06-08
2018-05-20	2	31	f	Y	Kien	Neck lateral	2	5	2019-06-08	3100	180	0.40562	0	-700	0	-0.0153247	2984	116	0.0611675	0.0192514	384	0	1			0	93	376	0	2019-06-08
2018-05-20	2	32	f	N	0	-	2	0	2018-05-28	100	64	0.4684					8100	166	0.08204	0.0238148	384	0	1					376	0	2019-06-08
2018-05-20	2	32	f	N	0	-	2	1	2018-07-31	402	90	0.578825	26	302	0.0372888	0.152171	8100	166	0.08204	0.0238148	384	0	1			0	64	376	0	2019-06-08
2018-05-20	2	32	f	N	0	-	2	2	2018-09-30	1460	131	0.57358	41	1058	0.0430773	0.148003	8100	166	0.08204	0.0238148	384	0	1			0	61	376	0	2019-06-08
2018-05-20	2	32	f	N	0	-	2	3	2018-12-25	3200	166	0.554084	35	1740	0.0192736	0.0638721	8100	166	0.08204	0.0238148	384	0	1			0	86	376	0	2019-06-08
2018-05-20	2	32	f	N	0	-	2	4	2019-03-07	4800	190	0.520899	24	1600	0.0131285	0.0394202	8100	166	0.08204	0.0238148	384	0	1			0	72	376	0	2019-06-08
2018-05-20	2	32	f	N	0	-	2	5	2019-06-08	8200	230	0.459447	40	3400	0.0143805	0.0403078	8100	166	0.08204	0.0238148	384	0	1			0	93	376	0	2019-06-08
2018-05-20	2	33	m	Y	Kien	Neck	2	0	2018-05-28	110	69	0.397168					3290	121	0.0638759	0.0188575	384	0	1					376	0	2019-06-08
2018-05-20	2	33	m	Y	Kien	Neck	2	1	2018-07-31	472	100	0.472	31	362	0.0405851	0.159304	3290	121	0.0638759	0.0188575	384	0	1			0	64	376	0	2019-06-08
2018-05-20	2	33	m	Y	Kien	Neck	2	2	2018-09-30	1841	141	0.560732	41	1369	0.0394283	0.15619	3290	121	0.0638759	0.0188575	384	0	1			0	61	376	0	2019-06-08
2018-05-20	2	33	m	Y	Kien	Neck	2	3	2018-12-25	2300	158	0.47247	17	459	0.0092657	0.0181186	3290	121	0.0638759	0.0188575	384	0	1			0	86	376	0	2019-06-08
2018-05-20	2	33	m	Y	Kien	Neck	2	4	2019-03-07	4000	185	0.476043	27	1700	0.0153379	0.0538013	3290	121	0.0638759	0.0188575	384	0	1			0	72	376	0	2019-06-08
2018-05-20	2	33	m	Y	Kien	Neck	2	5	2019-06-08	3400	190	0.36897	5	-600	0.0020073	-0.0122326	3290	121	0.0638759	0.0188575	384	0	1			0	93	376	0	2019-06-08
2018-05-20	2	34	f	N	0	-	2	0	2018-05-28	100	68	0.379769					7900	172	0.0815803	0.0234785	385	0	1					376	0	2019-06-08
2018-05-20	2	34	f	N	0	-	2	1	2018-07-31	485	100	0.485	32	385	0.0421818	0.172701	7900	172	0.0815803	0.0234785	385	0	1			0	64	376	0	2019-06-08
2018-05-20	2	34	f	N	0	-	2	2	2018-09-30	1729	141	0.526619	41	1244	0.0394283	0.14587	7900	172	0.0815803	0.0234785	385	0	1			0	61	376	0	2019-06-08
2018-05-20	2	34	f	N	0	-	2	3	2018-12-25	3200	168	0.531594	27	1471	0.0142608	0.0501076	7900	172	0.0815803	0.0234785	385	0	1			0	86	376	0	2019-06-08
2018-05-20	2	34	f	N	0	-	2	4	2019-03-07	5000	200	0.454366	32	1800	0.016951	0.043389	7900	172	0.0815803	0.0234785	385	0	1			0	72	376	0	2019-06-08
2018-05-20	2	34	f	N	0	-	2	5	2019-06-08	8000	240	0.386865	40	3000	0.0137231	0.0353766	7900	172	0.0815803	0.0234785	385	0	1			0	93	376	0	2019-06-08
2018-05-20	2	35	m	Y	Kien	Neck	2	0	2018-05-28	98	61	0.541982									305	1	0	2019-03-21				376	1	2019-03-21
2018-05-20	2	35	m	Y	Kien	Neck	2	1	2018-07-31	358	89	0.535789	28	260	0.0413178	0.141703					305	1	0	2019-03-21		0	64	376	1	2019-03-21
2018-05-20	2	35	m	Y	Kien	Neck	2	2	2018-09-30	1291	129	0.534916	40	933	0.042594	0.147188					305	1	0	2019-03-21		0	61	376	1	2019-03-21
2018-05-20	2	35	m	Y	Kien	Neck	2	3	2018-12-25	2600	148	0.669681	19	1309	0.0111837	0.0569844					305	1	0	2019-03-21		0	86	376	1	2019-03-21
2018-05-20	2	35	m	Y	Kien	Neck	2	4	2019-03-07	2000	150	0.491761	2	-600	0.001305	-0.0255076					305	1	0	2019-03-21		0	72	376	1	2019-03-21
2018-05-20	2	35	m	Y	Kien	Neck	2	5	2019-06-08												305	1	0	2019-03-21	2019-03-21	1	93	376	1	2019-03-21
2018-05-20	2	36	m	N	0	-	2	0	2018-05-28	103	64	0.482453					1097	76	0.0457113	0.0145726	384	0	1					376	0	2019-06-08
2018-05-20	2	36	m	N	0	-	2	1	2018-07-31	275	84	0.50272	20	172	0.0297427	0.107411	1097	76	0.0457113	0.0145726	384	0	1			0	64	376	0	2019-06-08
2018-05-20	2	36	m	N	0	-	2	2	2018-09-30	1105	123	0.539872	39	830	0.0437635	0.159603	1097	76	0.0457113	0.0145726	384	0	1			0	61	376	0	2019-06-08
2018-05-20	2	36	m	N	0	-	2	3	2018-12-25	1800	138	0.590596	15	695	0.0093661	0.0397162	1097	76	0.0457113	0.0145726	384	0	1			0	86	376	0	2019-06-08
2018-05-20	2	36	m	N	0	-	2	4	2019-03-07	1100	140	0.343392	2	-700	0.0013989	-0.0478797	1097	76	0.0457113	0.0145726	384	0	1			0	72	376	0	2019-06-08
2018-05-20	2	36	m	N	0	-	2	5	2019-06-08	1200	140	0.374609	0	100	0	0.0065492	1097	76	0.0457113	0.0145726	384	0	1			0	93	376	0	2019-06-08
2018-05-20	2	37	m	Y	Kien	Neck	2	0	2018-05-28	88	61	0.486678					5112	144	0.0759403	0.0225664	384	0	1					376	0	2019-06-08
2018-05-20	2	37	m	Y	Kien	Neck	2	1	2018-07-31	335	90	0.482354	29	247	0.0425399	0.146212	5112	144	0.0759403	0.0225664	384	0	1			0	64	376	0	2019-06-08
2018-05-20	2	37	m	Y	Kien	Neck	2	2	2018-09-30	1220	125	0.563704	35	885	0.0376972	0.148317	5112	144	0.0759403	0.0225664	384	0	1			0	61	376	0	2019-06-08
2018-05-20	2	37	m	Y	Kien	Neck	2	3	2018-12-25	1900	137	0.639294	12	680	0.0074613	0.0360584	5112	144	0.0759403	0.0225664	384	0	1			0	86	376	0	2019-06-08
2018-05-20	2	37	m	Y	Kien	Neck	2	4	2019-03-07	3800	170	0.605941	33	1900	0.0209823	0.0673893	5112	144	0.0759403	0.0225664	384	0	1			0	72	376	0	2019-06-08
2018-05-20	2	37	m	Y	Kien	Neck	2	5	2019-06-08	5200	205	0.433845	35	1400	0.0140912	0.0236086	5112	144	0.0759403	0.0225664	384	0	1			0	93	376	0	2019-06-08
2018-05-20	2	38	m	N	0	-	2	0	2018-05-28	117	70	0.401927					6683	160	0.0756317	0.0221465	384	0	1					376	0	2019-06-08
2018-05-20	2	38	m	N	0	-	2	1	2018-07-31	461	100	0.461	30	344	0.0390113	0.149978	6683	160	0.0756317	0.0221465	384	0	1			0	64	376	0	2019-06-08
2018-05-20	2	38	m	N	0	-	2	2	2018-09-30	1438	136	0.496266	36	977	0.0352851	0.130546	6683	160	0.0756317	0.0221465	384	0	1			0	61	376	0	2019-06-08
2018-05-20	2	38	m	N	0	-	2	3	2018-12-25	3200	165	0.56579	29	1762	0.015733	0.0651079	6683	160	0.0756317	0.0221465	384	0	1			0	86	376	0	2019-06-08
2018-05-20	2	38	m	N	0	-	2	4	2019-03-07	5800	200	0.527065	35	2600	0.0187028	0.0578187	6683	160	0.0756317	0.0221465	384	0	1			0	72	376	0	2019-06-08
2018-05-20	2	38	m	N	0	-	2	5	2019-06-08	6800	230	0.381005	30	1000	0.0105197	0.0119726	6683	160	0.0756317	0.0221465	384	0	1			0	93	376	0	2019-06-08
2018-05-20	2	39	m	Y	Kien	Neck	2	0	2018-05-28	87	62	0.454825					8913	173	0.0863657	0.0248063	384	0	1					376	0	2019-06-08
2018-05-20	2	39	m	Y	Kien	Neck	2	1	2018-07-31	381	91	0.52801	29	294	0.0419699	0.161535	8913	173	0.0863657	0.0248063	384	0	1			0	64	376	0	2019-06-08
2018-05-20	2	39	m	Y	Kien	Neck	2	2	2018-09-30	1608	130	0.648697	39	1227	0.0409299	0.16524	8913	173	0.0863657	0.0248063	384	0	1			0	61	376	0	2019-06-08
2018-05-20	2	39	m	Y	Kien	Neck	2	3	2018-12-25	4000	176	0.5657	46	2392	0.0246587	0.0741758	8913	173	0.0863657	0.0248063	384	0	1			0	86	376	0	2019-06-08
2018-05-20	2	39	m	Y	Kien	Neck	2	4	2019-03-07	5700	200	0.517978	24	1700	0.0124282	0.0344334	8913	173	0.0863657	0.0248063	384	0	1			0	72	376	0	2019-06-08
2018-05-20	2	39	m	Y	Kien	Neck	2	5	2019-06-08	9000	235	0.46811	35	3300	0.0121385	0.0343797	8913	173	0.0863657	0.0248063	384	0	1			0	93	376	0	2019-06-08
2018-05-20	2	40	f	N	0	-	2	0	2018-05-28	90	67	0.359769					7910	163	0.0835418	0.022962	385	0	1					376	0	2019-06-08
2018-05-20	2	40	f	N	0	-	2	1	2018-07-31	425	97	0.472236	30	335	0.0404708	0.169781	7910	163	0.0835418	0.022962	385	0	1			0	64	376	0	2019-06-08
2018-05-20	2	40	f	N	0	-	2	2	2018-09-30	1118	116	0.668986	19	693	0.0205271	0.110991	7910	163	0.0835418	0.022962	385	0	1			0	61	376	0	2019-06-08
2018-05-20	2	40	f	N	0	-	2	3	2018-12-25	3400	169	0.553338	53	2282	0.0306298	0.0905307	7910	163	0.0835418	0.022962	385	0	1			0	86	376	0	2019-06-08
2018-05-20	2	40	f	N	0	-	2	4	2019-03-07	5300	200	0.481628	31	1900	0.016374	0.04316	7910	163	0.0835418	0.022962	385	0	1			0	72	376	0	2019-06-08
2018-05-20	2	40	f	N	0	-	2	5	2019-06-08	8000	230	0.448241	30	2700	0.0105197	0.0309908	7910	163	0.0835418	0.022962	385	0	1			0	93	376	0	2019-06-08
2018-05-20	2	41	f	Y	Kien	Neck	2	0	2018-05-28	101	68	0.383566									262	1	0	2019-02-06				376	1	2019-02-06
2018-05-20	2	41	f	Y	Kien	Neck	2	1	2018-07-31	462	100	0.462	32	361	0.0421818	0.166299					262	1	0	2019-02-06		0	64	376	1	2019-02-06
2018-05-20	2	41	f	Y	Kien	Neck	2	2	2018-09-30	1647	140	0.514151	40	1185	0.0386116	0.145869					262	1	0	2019-02-06		0	61	376	1	2019-02-06
2018-05-20	2	41	f	Y	Kien	Neck	2	3	2018-12-25	3200	161	0.615932	21	1553	0.011376	0.0540624					262	1	0	2019-02-06		0	86	376	1	2019-02-06
2018-05-20	2	41	f	Y	Kien	Neck	2	4	2019-03-07												262	1	0	2019-02-06	2019-02-06	1	72	376	1	2019-02-06
2018-05-20	2	41	f	Y	Kien	Neck	2	5	2019-06-08												262	1	0	2019-02-06		0	93	376	1	2019-02-06
2018-05-20	2	42	f	N	0	-	2	0	2018-05-28	78	62	0.407774					4522	128	0.0759035	0.020849	384	0	1					376	0	2019-06-08
2018-05-20	2	42	f	N	0	-	2	1	2018-07-31	337	82	0.669629	20	259	0.0305796	0.160056	4522	128	0.0759035	0.020849	384	0	1			0	64	376	0	2019-06-08
2018-05-20	2	42	f	N	0	-	2	2	2018-09-30	1342	126	0.603213	44	1005	0.0492941	0.158571	4522	128	0.0759035	0.020849	384	0	1			0	61	376	0	2019-06-08
2018-05-20	2	42	f	N	0	-	2	3	2018-12-25	1900	141	0.578703	15	558	0.0091552	0.0283006	4522	128	0.0759035	0.020849	384	0	1			0	86	376	0	2019-06-08
2018-05-20	2	42	f	N	0	-	2	4	2019-03-07	3200	170	0.510266	29	1300	0.0181843	0.0506816	4522	128	0.0759035	0.020849	384	0	1			0	72	376	0	2019-06-08
2018-05-20	2	42	f	N	0	-	2	5	2019-06-08	4600	190	0.499195	20	1400	0.0083718	0.0273155	4522	128	0.0759035	0.020849	384	0	1			0	93	376	0	2019-06-08
2018-05-20	2	43	f	Y	Kien	Neck	2	0	2018-05-28	100	65	0.443935					13300	205	0.0911832	0.0265113	386	0	1					376	0	2019-06-08
2018-05-20	2	43	f	Y	Kien	Neck	2	1	2018-07-31	412	99	0.426579	34	312	0.0460176	0.154859	13300	205	0.0911832	0.0265113	386	0	1			0	64	376	0	2019-06-08
2018-05-20	2	43	f	Y	Kien	Neck	2	2	2018-09-30	1873	141	0.570479	42	1461	0.0405816	0.173769	13300	205	0.0911832	0.0265113	386	0	1			0	61	376	0	2019-06-08
2018-05-20	2	43	f	Y	Kien	Neck	2	3	2018-12-25	4400	182	0.554122	41	2527	0.0207759	0.0695168	13300	205	0.0911832	0.0265113	386	0	1			0	86	376	0	2019-06-08
2018-05-20	2	43	f	Y	Kien	Neck	2	4	2019-03-07	7700	220	0.503162	38	3300	0.0184354	0.0544071	13300	205	0.0911832	0.0265113	386	0	1			0	72	376	0	2019-06-08
2018-05-20	2	43	f	Y	Kien	Neck	2	5	2019-06-08	13400	270	0.431108	50	5700	0.0154146	0.0417015	13300	205	0.0911832	0.0265113	386	0	1			0	93	376	0	2019-06-08
2018-05-20	2	44	m	N	0	-	2	0	2018-05-28	109	69	0.393558					3691	121	0.0661166	0.0188575	384	0	1					376	0	2019-06-08
2018-05-20	2	44	m	N	0	-	2	1	2018-07-31	179	80	0.387402	11	70	0.0161788	0.0542541	3691	121	0.0661166	0.0188575	384	0	1			0	64	376	0	2019-06-08
2018-05-20	2	44	m	N	0	-	2	2	2018-09-30	945	112	0.638466	32	766	0.0386116	0.190928	3691	121	0.0661166	0.0188575	384	0	1			0	61	376	0	2019-06-08
2018-05-20	2	44	m	N	0	-	2	3	2018-12-25	2000	147	0.527366	35	1055	0.0221341	0.0610235	3691	121	0.0661166	0.0188575	384	0	1			0	86	376	0	2019-06-08
2018-05-20	2	44	m	N	0	-	2	4	2019-03-07	2800	160	0.550685	13	800	0.0082387	0.0327126	3691	121	0.0661166	0.0188575	384	0	1			0	72	376	0	2019-06-08
2018-05-20	2	44	m	N	0	-	2	5	2019-06-08	3800	190	0.412379	30	1000	0.012935	0.0229857	3691	121	0.0661166	0.0188575	384	0	1			0	93	376	0	2019-06-08
2018-05-20	2	45	m	Y	Kien	Neck lateral	2	0	2018-05-28	92	63	0.455061					3908	127	0.0702283	0.0205511	384	0	1					376	0	2019-06-08
2018-05-20	2	45	m	Y	Kien	Neck lateral	2	1	2018-07-31	435	92	0.580475	29	343	0.0414153	0.16992	3908	127	0.0702283	0.0205511	384	0	1			0	64	376	0	2019-06-08
2018-05-20	2	45	m	Y	Kien	Neck lateral	2	2	2018-09-30	1420	136	0.490054	44	985	0.0448535	0.135762	3908	127	0.0702283	0.0205511	384	0	1			0	61	376	0	2019-06-08
2018-05-20	2	45	m	Y	Kien	Neck lateral	2	3	2018-12-25	2900	155	0.636576	19	1480	0.0106441	0.0581207	3908	127	0.0702283	0.0205511	384	0	1			0	86	376	0	2019-06-08
2018-05-20	2	45	m	Y	Kien	Neck lateral	2	4	2019-03-07	3600	185	0.428438	30	700	0.0172016	0.0210217	3908	127	0.0702283	0.0205511	384	0	1			0	72	376	0	2019-06-08
2018-05-20	2	45	m	Y	Kien	Neck lateral	2	5	2019-06-08	4000	190	0.434083	5	400	0.0020073	0.0079304	3908	127	0.0702283	0.0205511	384	0	1			0	93	376	0	2019-06-08
2018-05-20	2	46	m	N	0	-	2	0	2018-05-28	78	62	0.407774					5922	158	0.0808501	0.0235783	384	0	1					376	0	2019-06-08
2018-05-20	2	46	m	N	0	-	2	1	2018-07-31	337	82	0.669629	20	259	0.0305796	0.160056	5922	158	0.0808501	0.0235783	384	0	1			0	64	376	0	2019-06-08
2018-05-20	2	46	m	N	0	-	2	2	2018-09-30	1278	129	0.52953	47	941	0.0519943	0.152964	5922	158	0.0808501	0.0235783	384	0	1			0	61	376	0	2019-06-08
2018-05-20	2	46	m	N	0	-	2	3	2018-12-25	2800	158	0.575181	29	1522	0.0165056	0.0638402	5922	158	0.0808501	0.0235783	384	0	1			0	86	376	0	2019-06-08
2018-05-20	2	46	m	N	0	-	2	4	2019-03-07	4300	185	0.511746	27	1500	0.0153379	0.0417079	5922	158	0.0808501	0.0235783	384	0	1			0	72	376	0	2019-06-08
2018-05-20	2	46	m	N	0	-	2	5	2019-06-08	6000	220	0.392075	35	1700	0.013042	0.0250754	5922	158	0.0808501	0.0235783	384	0	1			0	93	376	0	2019-06-08
2018-05-20	2	47	m	Y	Kien	Neck lateral	2	0	2018-05-28	105	68	0.398757					6895	167	0.078186	0.0230866	384	0	1					376	0	2019-06-08
2018-05-20	2	47	m	Y	Kien	Neck lateral	2	1	2018-07-31	399	91	0.552955	23	294	0.0318666	0.146016	6895	167	0.078186	0.0230866	384	0	1			0	64	376	0	2019-06-08
2018-05-20	2	47	m	Y	Kien	Neck lateral	2	2	2018-09-30	1543	135	0.546275	44	1144	0.0452608	0.155207	6895	167	0.078186	0.0230866	384	0	1			0	61	376	0	2019-06-08
2018-05-20	2	47	m	Y	Kien	Neck lateral	2	3	2018-12-25	3900	180	0.510296	45	2357	0.023416	0.0754737	6895	167	0.078186	0.0230866	384	0	1			0	86	376	0	2019-06-08
2018-05-20	2	47	m	Y	Kien	Neck lateral	2	4	2019-03-07	5000	200	0.454366	20	1100	0.0102434	0.024156	6895	167	0.078186	0.0230866	384	0	1			0	72	376	0	2019-06-08
2018-05-20	2	47	m	Y	Kien	Neck lateral	2	5	2019-06-08	7000	235	0.364085	35	2000	0.0121385	0.0253259	6895	167	0.078186	0.0230866	384	0	1			0	93	376	0	2019-06-08
2018-05-20	2	48	f	N	0	-	2	0	2018-05-28	101	68	0.383566									91	1	0	2018-08-19				376	1	2018-08-19
2018-05-20	2	48	f	N	0	-	2	1	2018-07-31	92	68	0.349387	0	-9	0	-0.0102082					91	1	0	2018-08-19		0	64	376	1	2018-08-19
2018-05-20	2	48	f	N	0	-	2	2	2018-09-30												91	1	0	2018-08-19	2018-08-19	1	61	376	1	2018-08-19
2018-05-20	2	48	f	N	0	-	2	3	2018-12-25												91	1	0	2018-08-19		0	86	376	1	2018-08-19
2018-05-20	2	48	f	N	0	-	2	4	2019-03-07												91	1	0	2018-08-19		0	72	376	1	2018-08-19
2018-05-20	2	48	f	N	0	-	2	5	2019-06-08												91	1	0	2018-08-19		0	93	376	1	2018-08-19
2018-05-20	2	49	f	Y	Kien	Neck upper	2	0	2018-05-28	111	69	0.400779					5189	136	0.0719721	0.0202721	384	0	1					376	0	2019-06-08
2018-05-20	2	49	f	Y	Kien	Neck upper	2	1	2018-07-31	362	96	0.416917	27	251	0.0361202	0.129294	5189	136	0.0719721	0.0202721	384	0	1			0	64	376	0	2019-06-08
2018-05-20	2	49	f	Y	Kien	Neck upper	2	2	2018-09-30	1800	144	0.509728	48	1438	0.0465288	0.184054	5189	136	0.0719721	0.0202721	384	0	1			0	61	376	0	2019-06-08
2018-05-20	2	49	f	Y	Kien	Neck upper	2	3	2018-12-25	2900	171	0.453139	27	1100	0.0139878	0.0388194	5189	136	0.0719721	0.0202721	384	0	1			0	86	376	0	2019-06-08
2018-05-20	2	49	f	Y	Kien	Neck upper	2	4	2019-03-07	4000	185	0.476043	14	1100	0.0076506	0.0312651	5189	136	0.0719721	0.0202721	384	0	1			0	72	376	0	2019-06-08
2018-05-20	2	49	f	Y	Kien	Neck upper	2	5	2019-06-08	5300	205	0.442189	20	1300	0.0077267	0.0211816	5189	136	0.0719721	0.0202721	384	0	1			0	93	376	0	2019-06-08
2018-05-20	2	50	f	N	0	-	2	0	2018-05-28	114	70	0.391621					1286	90	0.046692	0.0153903	384	0	1					376	0	2019-06-08
2018-05-20	2	50	f	N	0	-	2	1	2018-07-31	568	103	0.51278	33	454	0.0422443	0.175648	1286	90	0.046692	0.0153903	384	0	1			0	64	376	0	2019-06-08
2018-05-20	2	50	f	N	0	-	2	2	2018-09-30	1766	140	0.5513	37	1198	0.0352196	0.130171	1286	90	0.046692	0.0153903	384	0	1			0	61	376	0	2019-06-08
2018-05-20	2	50	f	N	0	-	2	3	2018-12-25	2000	153	0.459195	13	234	0.0072275	0.010128	1286	90	0.046692	0.0153903	384	0	1			0	86	376	0	2019-06-08
2018-05-20	2	50	f	N	0	-	2	4	2019-03-07	1800	155	0.395116	2	-200	0.0012626	-0.0102434	1286	90	0.046692	0.0153903	384	0	1			0	72	376	0	2019-06-08
2018-05-20	2	50	f	N	0	-	2	5	2019-06-08	1400	160	0.275342	5	-400	0.0023897	-0.0189161	1286	90	0.046692	0.0153903	384	0	1			0	93	376	0	2019-06-08
2018-05-20	2	51	m	Y	Kien	Neck upper	3	0	2018-05-28	95	66	0.400038					8705	164	0.0843096	0.0232419	384	0	1					376	0	2019-06-08
2018-05-20	2	51	m	Y	Kien	Neck upper	3	1	2018-07-31	380	95	0.453795	29	285	0.0398368	0.151626	8705	164	0.0843096	0.0232419	384	0	1			0	64	376	0	2019-06-08
2018-05-20	2	51	m	Y	Kien	Neck upper	3	2	2018-09-30	1285	122	0.6458	27	905	0.0287051	0.13981	8705	164	0.0843096	0.0232419	384	0	1			0	61	376	0	2019-06-08
2018-05-20	2	51	m	Y	Kien	Neck upper	3	3	2018-12-25	4000	179	0.533566	57	2715	0.0312041	0.0924273	8705	164	0.0843096	0.0232419	384	0	1			0	86	376	0	2019-06-08
2018-05-20	2	51	m	Y	Kien	Neck upper	3	4	2019-03-07	6400	205	0.533964	26	2400	0.0131857	0.0456948	8705	164	0.0843096	0.0232419	384	0	1			0	72	376	0	2019-06-08
2018-05-20	2	51	m	Y	Kien	Neck upper	3	5	2019-06-08	8800	230	0.493065	25	2400	0.0086611	0.0239696	8705	164	0.0843096	0.0232419	384	0	1			0	93	376	0	2019-06-08
2018-05-20	2	52	f	N	0	-	3	0	2018-05-28	97	68	0.368376									330	1	0	2019-04-15				376	1	2019-04-15
2018-05-20	2	52	f	N	0	-	3	1	2018-07-31	364	93	0.467897	25	267	0.0342444	0.144642					330	1	0	2019-04-15		0	64	376	1	2019-04-15
2018-05-20	2	52	f	N	0	-	3	2	2018-09-30	1415	137	0.476106	44	1051	0.0444536	0.155805					330	1	0	2019-04-15		0	61	376	1	2019-04-15
2018-05-20	2	52	f	N	0	-	3	3	2018-12-25	3600	169	0.585888	32	2185	0.0170863	0.0760073					330	1	0	2019-04-15		0	86	376	1	2019-04-15
2018-05-20	2	52	f	N	0	-	3	4	2019-03-07	5200	190	0.564308	21	1600	0.0113872	0.035751					330	1	0	2019-04-15		0	72	376	1	2019-04-15
2018-05-20	2	52	f	N	0	-	3	5	2019-06-08												330	1	0	2019-04-15	2019-04-15	1	93	376	1	2019-04-15
2018-05-20	2	53	m	Y	Kien	Neck upper	3	0	2018-05-28	128	70	0.439715					2872	115	0.0587244	0.0180931	384	0	1					376	0	2019-06-08
2018-05-20	2	53	m	Y	Kien	Neck upper	3	1	2018-07-31	470	100	0.47	30	342	0.0390113	0.142264	2872	115	0.0587244	0.0180931	384	0	1			0	64	376	0	2019-06-08
2018-05-20	2	53	m	Y	Kien	Neck upper	3	2	2018-09-30	1460	133	0.544285	33	990	0.0327255	0.130069	2872	115	0.0587244	0.0180931	384	0	1			0	61	376	0	2019-06-08
2018-05-20	2	53	m	Y	Kien	Neck upper	3	3	2018-12-25	2900	170	0.462429	37	1440	0.0199784	0.0558595	2872	115	0.0587244	0.0180931	384	0	1			0	86	376	0	2019-06-08
2018-05-20	2	53	m	Y	Kien	Neck upper	3	4	2019-03-07	3000	175	0.432723	5	100	0.0028182	0.003296	2872	115	0.0587244	0.0180931	384	0	1			0	72	376	0	2019-06-08
2018-05-20	2	53	m	Y	Kien	Neck upper	3	5	2019-06-08	3000	185	0.357032	10	0	0.0041827	0	2872	115	0.0587244	0.0180931	384	0	1			0	93	376	0	2019-06-08
2018-05-20	2	54	f	N	0	-	3	0	2018-05-28	109	68	0.413948					6391	172	0.0761103	0.0234785	384	0	1					376	0	2019-06-08
2018-05-20	2	54	f	N	0	-	3	1	2018-07-31	374	99	0.387234	31	265	0.0410826	0.134849	6391	172	0.0761103	0.0234785	384	0	1			0	64	376	0	2019-06-08
2018-05-20	2	54	f	N	0	-	3	2	2018-09-30	1741	135	0.616374	36	1367	0.0355916	0.176487	6391	172	0.0761103	0.0234785	384	0	1			0	61	376	0	2019-06-08
2018-05-20	2	54	f	N	0	-	3	3	2018-12-25	4400	185	0.523647	50	2659	0.0256461	0.0754653	6391	172	0.0761103	0.0234785	384	0	1			0	86	376	0	2019-06-08
2018-05-20	2	54	f	N	0	-	3	4	2019-03-07	6000	210	0.460545	25	1600	0.0123231	0.030154	6391	172	0.0761103	0.0234785	384	0	1			0	72	376	0	2019-06-08
2018-05-20	2	54	f	N	0	-	3	5	2019-06-08	6500	240	0.314328	30	500	0.0100508	0.0060247	6391	172	0.0761103	0.0234785	384	0	1			0	93	376	0	2019-06-08
2018-05-20	2	55	f	Y	Kien	Neck lateral	3	0	2018-05-28	92	64	0.430928					4108	136	0.0711366	0.0212129	384	0	1					376	0	2019-06-08
2018-05-20	2	55	f	Y	Kien	Neck lateral	3	1	2018-07-31	375	98	0.402151	34	283	0.046603	0.153687	4108	136	0.0711366	0.0212129	384	0	1			0	64	376	0	2019-06-08
2018-05-20	2	55	f	Y	Kien	Neck lateral	3	2	2018-09-30	1430	128	0.608681	30	1055	0.0306465	0.153599	4108	136	0.0711366	0.0212129	384	0	1			0	61	376	0	2019-06-08
2018-05-20	2	55	f	Y	Kien	Neck lateral	3	3	2018-12-25	3600	172	0.551282	44	2170	0.0240494	0.075149	4108	136	0.0711366	0.0212129	384	0	1			0	86	376	0	2019-06-08
2018-05-20	2	55	f	Y	Kien	Neck lateral	3	4	2019-03-07	3900	190	0.423231	18	300	0.0096765	0.0077819	4108	136	0.0711366	0.0212129	384	0	1			0	72	376	0	2019-06-08
2018-05-20	2	55	f	Y	Kien	Neck lateral	3	5	2019-06-08	4200	200	0.381668	10	300	0.0038608	0.005578	4108	136	0.0711366	0.0212129	384	0	1			0	93	376	0	2019-06-08
2018-05-20	2	56	f	N	0	-	3	0	2018-05-28	95	64	0.44498					3705	126	0.068676	0.0202579	384	0	1					376	0	2019-06-08
2018-05-20	2	56	f	N	0	-	3	1	2018-07-31	424	94	0.525223	30	329	0.042045	0.163609	3705	126	0.068676	0.0202579	384	0	1			0	64	376	0	2019-06-08
2018-05-20	2	56	f	N	0	-	3	2	2018-09-30	1680	132	0.642871	38	1256	0.0389598	0.157995	3705	126	0.068676	0.0202579	384	0	1			0	61	376	0	2019-06-08
2018-05-20	2	56	f	N	0	-	3	3	2018-12-25	2300	147	0.606471	15	620	0.0087606	0.0255675	3705	126	0.068676	0.0202579	384	0	1			0	86	376	0	2019-06-08
2018-05-20	2	56	f	N	0	-	3	4	2019-03-07	3600	185	0.428438	38	1300	0.0223536	0.043558	3705	126	0.068676	0.0202579	384	0	1			0	72	376	0	2019-06-08
2018-05-20	2	56	f	N	0	-	3	5	2019-06-08	3800	190	0.412379	5	200	0.0020073	0.0040696	3705	126	0.068676	0.0202579	384	0	1			0	93	376	0	2019-06-08
2018-05-20	2	57	f	Y	Kien	Neck upper	3	0	2018-05-28	90	67	0.359769					7410	153	0.0823403	0.0221344	386	0	1					376	0	2019-06-08
2018-05-20	2	57	f	Y	Kien	Neck upper	3	1	2018-07-31	302	92	0.402996	25	212	0.0346824	0.132411	7410	153	0.0823403	0.0221344	386	0	1			0	64	376	0	2019-06-08
2018-05-20	2	57	f	Y	Kien	Neck upper	3	2	2018-09-30	1350	127	0.590436	35	1048	0.0369966	0.171837	7410	153	0.0823403	0.0221344	386	0	1			0	61	376	0	2019-06-08
2018-05-20	2	57	f	Y	Kien	Neck upper	3	3	2018-12-25	3900	177	0.54085	50	2550	0.0270202	0.08635	7410	153	0.0823403	0.0221344	386	0	1			0	86	376	0	2019-06-08
2018-05-20	2	57	f	Y	Kien	Neck upper	3	4	2019-03-07	6200	200	0.563414	23	2300	0.0118774	0.0450696	7410	153	0.0823403	0.0221344	386	0	1			0	72	376	0	2019-06-08
2018-05-20	2	57	f	Y	Kien	Neck upper	3	5	2019-06-08	7500	220	0.490093	20	1300	0.0071739	0.0143277	7410	153	0.0823403	0.0221344	386	0	1			0	93	376	0	2019-06-08
2018-05-20	3	58	m	N	0	-	3	0	2018-05-28	81	70	0.278257					9119	175	0.0881052	0.0233227	384	0	1					376	0	2019-06-08
2018-05-20	3	58	m	N	0	-	3	1	2018-07-31	402	95	0.480068	25	321	0.0334011	0.175219	9119	175	0.0881052	0.0233227	384	0	1			0	64	376	0	2019-06-08
2018-05-20	3	58	m	N	0	-	3	2	2018-09-30	1100	122	0.552825	27	698	0.0287051	0.115513	9119	175	0.0881052	0.0233227	384	0	1			0	61	376	0	2019-06-08
2018-05-20	3	58	m	N	0	-	3	3	2018-12-25	1800	137	0.605647	15	700	0.0094386	0.0400853	9119	175	0.0881052	0.0233227	384	0	1			0	86	376	0	2019-06-08
2018-05-20	3	58	m	N	0	-	3	4	2019-03-07	3900	185	0.464141	48	2100	0.0292031	0.0751712	9119	175	0.0881052	0.0233227	384	0	1			0	72	376	0	2019-06-08
2018-05-20	3	58	m	N	0	-	3	5	2019-06-08	9200	245	0.41426	60	5300	0.0211432	0.0645977	9119	175	0.0881052	0.0233227	384	0	1			0	93	376	0	2019-06-08
2018-05-20	3	59	f	Y	Kien	Neck upper	3	0	2018-05-28	141	69	0.509098									108	1	0	2018-09-05				376	1	2018-09-05
2018-05-20	3	59	f	Y	Kien	Neck upper	3	1	2018-07-31	109	69	0.393558	0	-32	0	-0.0281544					108	1	0	2018-09-05		0	64	376	1	2018-09-05
2018-05-20	3	59	f	Y	Kien	Neck upper	3	2	2018-09-30												108	1	0	2018-09-05	2018-09-05	1	61	376	1	2018-09-05
2018-05-20	3	59	f	Y	Kien	Neck upper	3	3	2018-12-25												108	1	0	2018-09-05		0	86	376	1	2018-09-05
2018-05-20	3	59	f	Y	Kien	Neck upper	3	4	2019-03-07												108	1	0	2018-09-05		0	72	376	1	2018-09-05
2018-05-20	3	59	f	Y	Kien	Neck upper	3	5	2019-06-08												108	1	0	2018-09-05		0	93	376	1	2018-09-05
2018-05-20	3	60	m	N	0	-	3	0	2018-05-28	105	67	0.419731					7095	163	0.0787105	0.022962	384	0	1					376	0	2019-06-08
2018-05-20	3	60	m	N	0	-	3	1	2018-07-31	409	93	0.525742	26	304	0.0358648	0.148723	7095	163	0.0787105	0.022962	384	0	1			0	64	376	0	2019-06-08
2018-05-20	3	60	m	N	0	-	3	2	2018-09-30	1316	130	0.530899	37	907	0.0384352	0.134106	7095	163	0.0787105	0.022962	384	0	1			0	61	376	0	2019-06-08
2018-05-20	3	60	m	N	0	-	3	3	2018-12-25	3200	167	0.542689	37	1884	0.0203862	0.0723242	7095	163	0.0787105	0.022962	384	0	1			0	86	376	0	2019-06-08
2018-05-20	3	60	m	N	0	-	3	4	2019-03-07	5200	200	0.472541	33	2000	0.0175315	0.0472021	7095	163	0.0787105	0.022962	384	0	1			0	72	376	0	2019-06-08
2018-05-20	3	60	m	N	0	-	3	5	2019-06-08	7200	230	0.403417	30	2000	0.0105197	0.0244942	7095	163	0.0787105	0.022962	384	0	1			0	93	376	0	2019-06-08
2018-05-20	3	61	m	Y	Kien	Neck upper	3	0	2018-05-28	111	69	0.400779									79	1	0	2018-08-07				376	1	2018-08-07
2018-05-20	3	61	m	Y	Kien	Neck upper	3	1	2018-07-31	191	75	0.516799	6	80	0.0091199	0.0593625					79	1	0	2018-08-07		0	64	376	1	2018-08-07
2018-05-20	3	61	m	Y	Kien	Neck upper	3	2	2018-09-30												79	1	0	2018-08-07	2018-08-07	1	61	376	1	2018-08-07
2018-05-20	3	61	m	Y	Kien	Neck upper	3	3	2018-12-25												79	1	0	2018-08-07		0	86	376	1	2018-08-07
2018-05-20	3	61	m	Y	Kien	Neck upper	3	4	2019-03-07												79	1	0	2018-08-07		0	72	376	1	2018-08-07
2018-05-20	3	61	m	Y	Kien	Neck upper	3	5	2019-06-08												79	1	0	2018-08-07		0	93	376	1	2018-08-07
2018-05-20	3	62	m	N	0	-	3	0	2018-05-28	117	70	0.401927					4883	140	0.0699073	0.0204529	386	0	1					376	0	2019-06-08
2018-05-20	3	62	m	N	0	-	3	1	2018-07-31	472	99	0.488702	29	355	0.0379121	0.152557	4883	140	0.0699073	0.0204529	386	0	1			0	64	376	0	2019-06-08
2018-05-20	3	62	m	N	0	-	3	2	2018-09-30	1269	130	0.511938	31	797	0.0312607	0.113492	4883	140	0.0699073	0.0204529	386	0	1			0	61	376	0	2019-06-08
2018-05-20	3	62	m	N	0	-	3	3	2018-12-25	3200	175	0.461571	45	1931	0.0241949	0.0752843	4883	140	0.0699073	0.0204529	386	0	1			0	86	376	0	2019-06-08
2018-05-20	3	62	m	N	0	-	3	4	2019-03-07	4500	200	0.40893	25	1300	0.0129822	0.0331456	4883	140	0.0699073	0.0204529	386	0	1			0	72	376	0	2019-06-08
2018-05-20	3	62	m	N	0	-	3	5	2019-06-08	5000	210	0.383788	10	500	0.0036724	0.0079304	4883	140	0.0699073	0.0204529	386	0	1			0	93	376	0	2019-06-08
2018-05-20	3	63	f	Y	Kien	Neck lateral	3	0	2018-05-28	130	72	0.40511									185	1	0	2018-11-21				376	1	2018-11-21
2018-05-20	3	63	f	Y	Kien	Neck lateral	3	1	2018-07-31	345	100	0.345	28	215	0.0359301	0.106751					185	1	0	2018-11-21		0	64	376	1	2018-11-21
2018-05-20	3	63	f	Y	Kien	Neck lateral	3	2	2018-09-30	1347	131	0.529187	31	1002	0.0309867	0.156305					185	1	0	2018-11-21		0	61	376	1	2018-11-21
2018-05-20	3	63	f	Y	Kien	Neck lateral	3	3	2018-12-25												185	1	0	2018-11-21	2018-11-21	1	86	376	1	2018-11-21
2018-05-20	3	63	f	Y	Kien	Neck lateral	3	4	2019-03-07												185	1	0	2018-11-21		0	72	376	1	2018-11-21
2018-05-20	3	63	f	Y	Kien	Neck lateral	3	5	2019-06-08												185	1	0	2018-11-21		0	93	376	1	2018-11-21
2018-05-20	3	64	m	N	0	-	3	0	2018-05-28	85	64	0.39814					8115	171	0.0850656	0.0242152	384	0	1					376	0	2019-06-08
2018-05-20	3	64	m	N	0	-	3	1	2018-07-31	438	90	0.63066	26	353	0.0372888	0.179328	8115	171	0.0850656	0.0242152	384	0	1			0	64	376	0	2019-06-08
2018-05-20	3	64	m	N	0	-	3	2	2018-09-30	1540	130	0.621265	40	1102	0.0421979	0.144283	8115	171	0.0850656	0.0242152	384	0	1			0	61	376	0	2019-06-08
2018-05-20	3	64	m	N	0	-	3	3	2018-12-25	3000	169	0.48824	39	1460	0.0213552	0.0542769	8115	171	0.0850656	0.0242152	384	0	1			0	86	376	0	2019-06-08
2018-05-20	3	64	m	N	0	-	3	4	2019-03-07	4200	190	0.455787	21	1200	0.0113872	0.0327126	8115	171	0.0850656	0.0242152	384	0	1			0	72	376	0	2019-06-08
2018-05-20	3	64	m	N	0	-	3	5	2019-06-08	8200	235	0.4265	45	4000	0.0159992	0.0503586	8115	171	0.0850656	0.0242152	384	0	1			0	93	376	0	2019-06-08
2018-05-20	3	65	f	Y	Kien	Neck upper	3	0	2018-05-28	117	70	0.401927					4383	135	0.0679458	0.0200043	384	0	1					376	0	2019-06-08
2018-05-20	3	65	f	Y	Kien	Neck upper	3	1	2018-07-31	360	95	0.429911	25	243	0.0334011	0.12293	4383	135	0.0679458	0.0200043	384	0	1			0	64	376	0	2019-06-08
2018-05-20	3	65	f	Y	Kien	Neck upper	3	2	2018-09-30	1760	136	0.607391	41	1400	0.0411712	0.182111	4383	135	0.0679458	0.0200043	384	0	1			0	61	376	0	2019-06-08
2018-05-20	3	65	f	Y	Kien	Neck upper	3	3	2018-12-25	2200	151	0.528643	15	440	0.008516	0.0181628	4383	135	0.0679458	0.0200043	384	0	1			0	86	376	0	2019-06-08
2018-05-20	3	65	f	Y	Kien	Neck upper	3	4	2019-03-07	3200	180	0.418704	29	1000	0.0170797	0.0364285	4383	135	0.0679458	0.0200043	384	0	1			0	72	376	0	2019-06-08
2018-05-20	3	65	f	Y	Kien	Neck upper	3	5	2019-06-08	4500	205	0.375443	25	1300	0.0097889	0.0256611	4383	135	0.0679458	0.0200043	384	0	1			0	93	376	0	2019-06-08
2018-05-20	3	66	m	N	0	-	3	0	2018-05-28	127	70	0.436279					4673	140	0.0676204	0.0204529	384	0	1					376	0	2019-06-08
2018-05-20	3	66	m	N	0	-	3	1	2018-07-31	395	100	0.395	30	268	0.0390113	0.124108	4673	140	0.0676204	0.0204529	384	0	1			0	64	376	0	2019-06-08
2018-05-20	3	66	m	N	0	-	3	2	2018-09-30	1850	135	0.654963	35	1455	0.0344382	0.177187	4673	140	0.0676204	0.0204529	384	0	1			0	61	376	0	2019-06-08
2018-05-20	3	66	m	N	0	-	3	3	2018-12-25	2300	158	0.47247	23	450	0.0128051	0.0177217	4673	140	0.0676204	0.0204529	384	0	1			0	86	376	0	2019-06-08
2018-05-20	3	66	m	N	0	-	3	4	2019-03-07	3900	180	0.510296	22	1600	0.0126741	0.0513399	4673	140	0.0676204	0.0204529	384	0	1			0	72	376	0	2019-06-08
2018-05-20	3	66	m	N	0	-	3	5	2019-06-08	4800	210	0.368436	30	900	0.0116027	0.0156288	4673	140	0.0676204	0.0204529	384	0	1			0	93	376	0	2019-06-08
2018-05-20	3	67	m	Y	Huu	Neck lateral	3	0	2018-05-28	97	64	0.454348					7903	166	0.0821473	0.0238148	385	0	1					376	0	2019-06-08
2018-05-20	3	67	m	Y	Huu	Neck lateral	3	1	2018-07-31	394	94	0.488061	30	297	0.042045	0.153304	7903	166	0.0821473	0.0238148	385	0	1			0	64	376	0	2019-06-08
2018-05-20	3	67	m	Y	Huu	Neck lateral	3	2	2018-09-30	1445	133	0.538693	39	1051	0.0398259	0.149124	7903	166	0.0821473	0.0238148	385	0	1			0	61	376	0	2019-06-08
2018-05-20	3	67	m	Y	Huu	Neck lateral	3	3	2018-12-25	3100	165	0.548109	32	1655	0.0175485	0.0621285	7903	166	0.0821473	0.0238148	385	0	1			0	86	376	0	2019-06-08
2018-05-20	3	67	m	Y	Huu	Neck lateral	3	4	2019-03-07	5000	200	0.454366	35	1900	0.0187028	0.0464757	7903	166	0.0821473	0.0238148	385	0	1			0	72	376	0	2019-06-08
2018-05-20	3	67	m	Y	Huu	Neck lateral	3	5	2019-06-08	8000	230	0.448241	30	3000	0.0105197	0.0353766	7903	166	0.0821473	0.0238148	385	0	1			0	93	376	0	2019-06-08
2018-05-20	3	68	m	N	0	-	3	0	2018-05-28	125	69	0.451328									314	1	0	2019-03-30				376	1	2019-03-30
2018-05-20	3	68	m	N	0	-	3	1	2018-07-31	400	94	0.495493	25	275	0.0338175	0.12722					314	1	0	2019-03-30		0	64	376	1	2019-03-30
2018-05-20	3	68	m	N	0	-	3	2	2018-09-30	1768	136	0.610151	42	1368	0.0423856	0.170541					314	1	0	2019-03-30		0	61	376	1	2019-03-30
2018-05-20	3	68	m	N	0	-	3	3	2018-12-25	1500	136	0.517662	0	-268	0	-0.0133801					314	1	0	2019-03-30		0	86	376	1	2019-03-30
2018-05-20	3	68	m	N	0	-	3	4	2019-03-07	1000	138	0.328109	2	-500	0.0014193	-0.0394202					314	1	0	2019-03-30		0	72	376	1	2019-03-30
2018-05-20	3	68	m	N	0	-	3	5	2019-06-08												314	1	0	2019-03-30	2019-03-30	1	93	376	1	2019-03-30
2018-05-20	3	69	f	Y	Huu	Neck lateral	3	0	2018-05-28	88	62	0.460052									320	1	0	2019-04-05				376	1	2019-04-05
2018-05-20	3	69	f	Y	Huu	Neck lateral	3	1	2018-07-31	396	91	0.548797	29	308	0.0419699	0.164509					320	1	0	2019-04-05		0	64	376	1	2019-04-05
2018-05-20	3	69	f	Y	Huu	Neck lateral	3	2	2018-09-30	1438	123	0.702566	32	1042	0.0345783	0.147986					320	1	0	2019-04-05		0	61	376	1	2019-04-05
2018-05-20	3	69	f	Y	Huu	Neck lateral	3	3	2018-12-25	2200	146	0.593966	23	762	0.013953	0.0346096					320	1	0	2019-04-05		0	86	376	1	2019-04-05
2018-05-20	3	69	f	Y	Huu	Neck lateral	3	4	2019-03-07	2400	155	0.526822	9	200	0.0058157	0.0084594					320	1	0	2019-04-05		0	72	376	1	2019-04-05
2018-05-20	3	69	f	Y	Huu	Neck lateral	3	5	2019-06-08												320	1	0	2019-04-05	2019-04-05	1	93	376	1	2019-04-05
2018-05-20	3	70	m	N	0	-	3	0	2018-05-28	105	66	0.442148					5595	154	0.0743612	0.0224144	384	0	1					376	0	2019-06-08
2018-05-20	3	70	m	N	0	-	3	1	2018-07-31	438	97	0.48668	31	333	0.0421155	0.156216	5595	154	0.0743612	0.0224144	384	0	1			0	64	376	0	2019-06-08
2018-05-20	3	70	m	N	0	-	3	2	2018-09-30	1108	116	0.663002	19	670	0.0205271	0.106502	5595	154	0.0743612	0.0224144	384	0	1			0	61	376	0	2019-06-08
2018-05-20	3	70	m	N	0	-	3	3	2018-12-25	3200	164	0.577817	48	2092	0.0281853	0.0863274	5595	154	0.0743612	0.0224144	384	0	1			0	86	376	0	2019-06-08
2018-05-20	3	70	m	N	0	-	3	4	2019-03-07	4000	195	0.396771	31	800	0.0168324	0.0216945	5595	154	0.0743612	0.0224144	384	0	1			0	72	376	0	2019-06-08
2018-05-20	3	70	m	N	0	-	3	5	2019-06-08	5700	220	0.372471	25	1700	0.0090795	0.0266581	5595	154	0.0743612	0.0224144	384	0	1			0	93	376	0	2019-06-08
2018-05-20	3	71	m	Y	Huu	Neck lateral	3	0	2018-05-28	111	67	0.443715					2389	113	0.057983	0.0183985	384	0	1					376	0	2019-06-08
2018-05-20	3	71	m	Y	Huu	Neck lateral	3	1	2018-07-31	233	82	0.462978	15	122	0.0220967	0.0811025	2389	113	0.057983	0.0183985	384	0	1			0	64	376	0	2019-06-08
2018-05-20	3	71	m	Y	Huu	Neck lateral	3	2	2018-09-30	1345	121	0.69548	39	1112	0.0446475	0.201177	2389	113	0.057983	0.0183985	384	0	1			0	61	376	0	2019-06-08
2018-05-20	3	71	m	Y	Huu	Neck lateral	3	3	2018-12-25	2800	163	0.516403	42	1455	0.0242525	0.0596811	2389	113	0.057983	0.0183985	384	0	1			0	86	376	0	2019-06-08
2018-05-20	3	71	m	Y	Huu	Neck lateral	3	4	2019-03-07	2600	165	0.459705	2	-200	0.0011857	-0.0072049	2389	113	0.057983	0.0183985	384	0	1			0	72	376	0	2019-06-08
2018-05-20	3	71	m	Y	Huu	Neck lateral	3	5	2019-06-08	2500	180	0.327112	15	-100	0.0065492	-0.0029521	2389	113	0.057983	0.0183985	384	0	1			0	93	376	0	2019-06-08
2018-05-20	3	72	f	N	0	-	3	0	2018-05-28	98	62	0.512331									41	1	0	2018-06-30				376	1	2018-06-30
2018-05-20	3	72	f	N	0	-	3	1	2018-07-31												41	1	0	2018-06-30	2018-06-30	1	64	376	1	2018-06-30
2018-05-20	3	72	f	N	0	-	3	2	2018-09-30												41	1	0	2018-06-30		0	61	376	1	2018-06-30
2018-05-20	3	72	f	N	0	-	3	3	2018-12-25												41	1	0	2018-06-30		0	86	376	1	2018-06-30
2018-05-20	3	72	f	N	0	-	3	4	2019-03-07												41	1	0	2018-06-30		0	72	376	1	2018-06-30
2018-05-20	3	72	f	N	0	-	3	5	2019-06-08												41	1	0	2018-06-30		0	93	376	1	2018-06-30
2018-05-20	3	73	m	Y	Huu	Neck upper	3	0	2018-05-28	111	66	0.467413					3389	124	0.0642471	0.0196851	384	0	1					376	0	2019-06-08
2018-05-20	3	73	m	Y	Huu	Neck upper	3	1	2018-07-31	520	100	0.52	34	409	0.045447	0.168908	3389	124	0.0642471	0.0196851	384	0	1			0	64	376	0	2019-06-08
2018-05-20	3	73	m	Y	Huu	Neck upper	3	2	2018-09-30	1250	124	0.593842	24	730	0.0246849	0.100647	3389	124	0.0642471	0.0196851	384	0	1			0	61	376	0	2019-06-08
2018-05-20	3	73	m	Y	Huu	Neck upper	3	3	2018-12-25	2800	171	0.437513	47	1550	0.026159	0.0656434	3389	124	0.0642471	0.0196851	384	0	1			0	86	376	0	2019-06-08
2018-05-20	3	73	m	Y	Huu	Neck upper	3	4	2019-03-07	3000	175	0.432723	4	200	0.002248	0.0067076	3389	124	0.0642471	0.0196851	384	0	1			0	72	376	0	2019-06-08
2018-05-20	3	73	m	Y	Huu	Neck upper	3	5	2019-06-08	3500	190	0.379822	15	500	0.00619	0.0116027	3389	124	0.0642471	0.0196851	384	0	1			0	93	376	0	2019-06-08
2018-05-20	3	74	f	N	0	-	3	0	2018-05-28	103	64	0.482453									213	1	0	2018-12-19				376	1	2018-12-19
2018-05-20	3	74	f	N	0	-	3	1	2018-07-31	291	88	0.45288	24	188	0.0348309	0.113596					213	1	0	2018-12-19		0	64	376	1	2018-12-19
2018-05-20	3	74	f	N	0	-	3	2	2018-09-30	1081	115	0.666517	27	790	0.0307077	0.150594					213	1	0	2018-12-19		0	61	376	1	2018-12-19
2018-05-20	3	74	f	N	0	-	3	3	2018-12-25												213	1	0	2018-12-19	2018-12-19	1	86	376	1	2018-12-19
2018-05-20	3	74	f	N	0	-	3	4	2019-03-07												213	1	0	2018-12-19		0	72	376	1	2018-12-19
2018-05-20	3	74	f	N	0	-	3	5	2019-06-08												213	1	0	2018-12-19		0	93	376	1	2018-12-19
2018-05-20	3	75	m	Y	Huu	Neck lateral	3	0	2018-05-28	124	66	0.522155					9076	179	0.0801775	0.0244181	385	0	1					376	0	2019-06-08
2018-05-20	3	75	m	Y	Huu	Neck lateral	3	1	2018-07-31	294	82	0.584186	16	170	0.0237414	0.0944232	9076	179	0.0801775	0.0244181	385	0	1			0	64	376	0	2019-06-08
2018-05-20	3	75	m	Y	Huu	Neck lateral	3	2	2018-09-30	980	118	0.552732	36	686	0.0417665	0.138161	9076	179	0.0801775	0.0244181	385	0	1			0	61	376	0	2019-06-08
2018-05-20	3	75	m	Y	Huu	Neck lateral	3	3	2018-12-25	3200	164	0.577817	46	2220	0.0267939	0.0963195	9076	179	0.0801775	0.0244181	385	0	1			0	86	376	0	2019-06-08
2018-05-20	3	75	m	Y	Huu	Neck lateral	3	4	2019-03-07	5100	200	0.463454	36	1900	0.0192938	0.0453143	9076	179	0.0801775	0.0244181	385	0	1			0	72	376	0	2019-06-08
2018-05-20	3	75	m	Y	Huu	Neck lateral	3	5	2019-06-08	9200	245	0.41426	45	4100	0.0152751	0.0444058	9076	179	0.0801775	0.0244181	385	0	1			0	93	376	0	2019-06-08
2018-05-20	3	76	f	N	0	-	4	0	2018-05-28	116	68	0.440532					4084	132	0.0668211	0.0200842	384	0	1					376	0	2019-06-08
2018-05-20	3	76	f	N	0	-	4	1	2018-07-31	305	85	0.535193	17	189	0.0244063	0.105735	4084	132	0.0668211	0.0200842	384	0	1			0	64	376	0	2019-06-08
2018-05-20	3	76	f	N	0	-	4	2	2018-09-30	1288	122	0.647308	37	983	0.0414687	0.165307	4084	132	0.0668211	0.0200842	384	0	1			0	61	376	0	2019-06-08
2018-05-20	3	76	f	N	0	-	4	3	2018-12-25	2600	151	0.62476	29	1312	0.0173583	0.0571738	4084	132	0.0668211	0.0200842	384	0	1			0	86	376	0	2019-06-08
2018-05-20	3	76	f	N	0	-	4	4	2019-03-07	2500	180	0.327112	29	-100	0.0170797	-0.0038131	4084	132	0.0668211	0.0200842	384	0	1			0	72	376	0	2019-06-08
2018-05-20	3	76	f	N	0	-	4	5	2019-06-08	4200	200	0.381668	20	1700	0.0079304	0.039049	4084	132	0.0668211	0.0200842	384	0	1			0	93	376	0	2019-06-08
2018-05-20	3	77	m	Y	Huu	Neck upper	4	0	2018-05-28	103	66	0.433726					7897	179	0.08103	0.0244181	386	0	1					376	0	2019-06-08
2018-05-20	3	77	m	Y	Huu	Neck upper	4	1	2018-07-31	293	90	0.42188	24	190	0.0339232	0.114345	7897	179	0.08103	0.0244181	386	0	1			0	64	376	0	2019-06-08
2018-05-20	3	77	m	Y	Huu	Neck upper	4	2	2018-09-30	1171	125	0.541064	35	878	0.0376972	0.158985	7897	179	0.08103	0.0244181	386	0	1			0	61	376	0	2019-06-08
2018-05-20	3	77	m	Y	Huu	Neck upper	4	3	2018-12-25	3900	175	0.562539	50	2729	0.0273873	0.0979282	7897	179	0.08103	0.0244181	386	0	1			0	86	376	0	2019-06-08
2018-05-20	3	77	m	Y	Huu	Neck upper	4	4	2019-03-07	6000	210	0.460545	35	2100	0.0177257	0.0418817	7897	179	0.08103	0.0244181	386	0	1			0	72	376	0	2019-06-08
2018-05-20	3	77	m	Y	Huu	Neck upper	4	5	2019-06-08	8000	245	0.360226	35	2000	0.0116027	0.0216535	7897	179	0.08103	0.0244181	386	0	1			0	93	376	0	2019-06-08
2018-05-20	3	78	m	N	0	-	4	0	2018-05-28	94	56	0.698871					3406	139	0.0673419	0.0232275	384	0	1					376	0	2019-06-08
2018-05-20	3	78	m	N	0	-	4	1	2018-07-31	347	92	0.463045	36	253	0.0542978	0.142847	3406	139	0.0673419	0.0232275	384	0	1			0	64	376	0	2019-06-08
2018-05-20	3	78	m	N	0	-	4	2	2018-09-30	1301	122	0.653841	30	954	0.0323873	0.151655	3406	139	0.0673419	0.0232275	384	0	1			0	61	376	0	2019-06-08
2018-05-20	3	78	m	N	0	-	4	3	2018-12-25	2600	150	0.63929	28	1299	0.0168174	0.0563564	3406	139	0.0673419	0.0232275	384	0	1			0	86	376	0	2019-06-08
2018-05-20	3	78	m	N	0	-	4	4	2019-03-07	2900	180	0.379451	30	300	0.0177257	0.0106166	3406	139	0.0673419	0.0232275	384	0	1			0	72	376	0	2019-06-08
2018-05-20	3	78	m	N	0	-	4	5	2019-06-08	3500	195	0.347175	15	600	0.0060247	0.0141545	3406	139	0.0673419	0.0232275	384	0	1			0	93	376	0	2019-06-08
2018-05-18	4	79	m	Y	Huu	Neck upper	4	0	2018-05-28	108	63	0.534202									375	1	0	2019-05-28				376	1	2019-05-28
2018-05-18	4	79	m	Y	Huu	Neck upper	4	1	2018-07-31	416	95	0.496786	32	308	0.0449249	0.147498					375	1	0	2019-05-28		0	64	376	1	2019-05-28
2018-05-18	4	79	m	Y	Huu	Neck upper	4	2	2018-09-30	1628	132	0.622972	37	1212	0.0377455	0.156573					375	1	0	2019-05-28		0	61	376	1	2019-05-28
2018-05-18	4	79	m	Y	Huu	Neck upper	4	3	2018-12-25	1400	151	0.336409	19	-228	0.0109459	-0.0122809					375	1	0	2019-05-28		0	86	376	1	2019-05-28
2018-05-18	4	79	m	Y	Huu	Neck upper	4	4	2019-03-07	1200	160	0.236008	9	-200	0.0056286	-0.0149869					375	1	0	2019-05-28		0	72	376	1	2019-05-28
2018-05-18	4	79	m	Y	Huu	Neck upper	4	5	2019-06-08												375	1	0	2019-05-28	2019-05-28	1	93	376	1	2019-05-28
2018-05-18	4	80	f	N	0	-	4	0	2018-05-28	100	66	0.421093					13700	204	0.0917308	0.026227	385	0	1					376	0	2019-06-08
2018-05-18	4	80	f	N	0	-	4	1	2018-07-31	327	87	0.529433	21	227	0.0302152	0.129586	13700	204	0.0917308	0.026227	385	0	1			0	64	376	0	2019-06-08
2018-05-18	4	80	f	N	0	-	4	2	2018-09-30	1380	132	0.528072	45	1053	0.0478403	0.165232	13700	204	0.0917308	0.026227	385	0	1			0	61	376	0	2019-06-08
2018-05-18	4	80	f	N	0	-	4	3	2018-12-25	4800	178	0.652812	46	3420	0.0243357	0.101462	13700	204	0.0917308	0.026227	385	0	1			0	86	376	0	2019-06-08
2018-05-18	4	80	f	N	0	-	4	4	2019-03-07	8200	220	0.535835	42	3400	0.0205959	0.0520643	13700	204	0.0917308	0.026227	385	0	1			0	72	376	0	2019-06-08
2018-05-18	4	80	f	N	0	-	4	5	2019-06-08	13800	270	0.443977	50	5600	0.0154146	0.03918	13700	204	0.0917308	0.026227	385	0	1			0	93	376	0	2019-06-08
2018-05-18	4	81	f	Y	Huu	Neck lateral	4	0	2018-05-28	82	64	0.384088									286	1	0	2019-02-28				376	1	2019-02-28
2018-05-18	4	81	f	Y	Huu	Neck lateral	4	1	2018-07-31	332	83	0.632598	19	250	0.0284329	0.152952					286	1	0	2019-02-28		0	64	376	1	2019-02-28
2018-05-18	4	81	f	Y	Huu	Neck lateral	4	2	2018-09-30	1110	115	0.684398	32	778	0.0374203	0.138506					286	1	0	2019-02-28		0	61	376	1	2019-02-28
2018-05-18	4	81	f	Y	Huu	Neck lateral	4	3	2018-12-25	1100	152	0.258353	37	-10	0.0227051	-0.0007366					286	1	0	2019-02-28		0	86	376	1	2019-02-28
2018-05-18	4	81	f	Y	Huu	Neck lateral	4	4	2019-03-07												286	1	0	2019-02-28	2019-02-28	1	72	376	1	2019-02-28
2018-05-18	4	81	f	Y	Huu	Neck lateral	4	5	2019-06-08												286	1	0	2019-02-28		0	93	376	1	2019-02-28
2018-05-18	4	82	f	N	0	-	4	0	2018-05-28	129	72	0.401994					5071	153	0.0688197	0.0212129	385	0	1					376	0	2019-06-08
2018-05-18	4	82	f	N	0	-	4	1	2018-07-31	500	100	0.5	28	371	0.0359301	0.148181	5071	153	0.0688197	0.0212129	385	0	1			0	64	376	0	2019-06-08
2018-05-18	4	82	f	N	0	-	4	2	2018-09-30	1910	141	0.581748	41	1410	0.0394283	0.153799	5071	153	0.0688197	0.0212129	385	0	1			0	61	376	0	2019-06-08
2018-05-18	4	82	f	N	0	-	4	3	2018-12-25	4800	164	0.866725	23	2890	0.0122994	0.0750068	5071	153	0.0688197	0.0212129	385	0	1			0	86	376	0	2019-06-08
2018-05-18	4	82	f	N	0	-	4	4	2019-03-07	4800	205	0.400473	41	0	0.0216945	0	5071	153	0.0688197	0.0212129	385	0	1			0	72	376	0	2019-06-08
2018-05-18	4	82	f	N	0	-	4	5	2019-06-08	5200	225	0.314378	20	400	0.0070068	0.0060247	5071	153	0.0688197	0.0212129	385	0	1			0	93	376	0	2019-06-08
2018-05-18	4	83	m	Y	Huu	Neck lateral	4	0	2018-05-28	93	63	0.460007					5607	152	0.0766206	0.0228525	386	0	1					376	0	2019-06-08
2018-05-18	4	83	m	Y	Huu	Neck lateral	4	1	2018-07-31	256	84	0.467987	21	163	0.0314652	0.110751	5607	152	0.0766206	0.0228525	386	0	1			0	64	376	0	2019-06-08
2018-05-18	4	83	m	Y	Huu	Neck lateral	4	2	2018-09-30	1208	112	0.816155	28	952	0.0330127	0.178046	5607	152	0.0766206	0.0228525	386	0	1			0	61	376	0	2019-06-08
2018-05-18	4	83	m	Y	Huu	Neck lateral	4	3	2018-12-25	3100	188	0.34896	76	1892	0.0421582	0.0767099	5607	152	0.0766206	0.0228525	386	0	1			0	86	376	0	2019-06-08
2018-05-18	4	83	m	Y	Huu	Neck lateral	4	4	2019-03-07	4200	190	0.455787	2	1100	0.0010288	0.0295247	5607	152	0.0766206	0.0228525	386	0	1			0	72	376	0	2019-06-08
2018-05-18	4	83	m	Y	Huu	Neck lateral	4	5	2019-06-08	5700	215	0.403309	25	1500	0.0093043	0.0229857	5607	152	0.0766206	0.0228525	386	0	1			0	93	376	0	2019-06-08
2018-05-18	4	84	m	N	0	-	4	0	2018-05-28	95	63	0.4699					4505	147	0.0722328	0.0224144	386	0	1					376	0	2019-06-08
2018-05-18	4	84	m	N	0	-	4	1	2018-07-31	282	86	0.475209	23	187	0.0340389	0.119003	4505	147	0.0722328	0.0224144	386	0	1			0	64	376	0	2019-06-08
2018-05-18	4	84	m	N	0	-	4	2	2018-09-30	960	120	0.510863	34	678	0.0382297	0.140577	4505	147	0.0722328	0.0224144	386	0	1			0	61	376	0	2019-06-08
2018-05-18	4	84	m	N	0	-	4	3	2018-12-25	3100	121	1.60297	1	2140	0.0006755	0.0954136	4505	147	0.0722328	0.0224144	386	0	1			0	86	376	0	2019-06-08
2018-05-18	4	84	m	N	0	-	4	4	2019-03-07	3600	180	0.471042	59	500	0.0386134	0.0145378	4505	147	0.0722328	0.0224144	386	0	1			0	72	376	0	2019-06-08
2018-05-18	4	84	m	N	0	-	4	5	2019-06-08	4600	210	0.353085	30	1000	0.0116027	0.0184501	4505	147	0.0722328	0.0224144	386	0	1			0	93	376	0	2019-06-08
2018-05-18	4	85	f	Y	Huu	Neck upper	4	0	2018-05-28	95	64	0.44498					11605	201	0.0896124	0.0264519	385	0	1					376	0	2019-06-08
2018-05-18	4	85	f	Y	Huu	Neck upper	4	1	2018-07-31	335	90	0.482354	26	240	0.0372888	0.13784	11605	201	0.0896124	0.0264519	385	0	1			0	64	376	0	2019-06-08
2018-05-18	4	85	f	Y	Huu	Neck upper	4	2	2018-09-30	1879	135	0.66523	45	1544	0.0465288	0.197878	11605	201	0.0896124	0.0264519	385	0	1			0	61	376	0	2019-06-08
2018-05-18	4	85	f	Y	Huu	Neck upper	4	3	2018-12-25	4400	187	0.504523	52	2521	0.0265214	0.0692564	11605	201	0.0896124	0.0264519	385	0	1			0	86	376	0	2019-06-08
2018-05-18	4	85	f	Y	Huu	Neck upper	4	4	2019-03-07	7500	215	0.53067	28	3100	0.0135654	0.0518485	11605	201	0.0896124	0.0264519	385	0	1			0	72	376	0	2019-06-08
2018-05-18	4	85	f	Y	Huu	Neck upper	4	5	2019-06-08	11700	265	0.401564	50	4200	0.0157381	0.033471	11605	201	0.0896124	0.0264519	385	0	1			0	93	376	0	2019-06-08
2018-05-18	4	86	f	N	0	-	4	0	2018-05-28	97	66	0.40846					2903	114	0.0638872	0.0186785	386	0	1					376	0	2019-06-08
2018-05-18	4	86	f	N	0	-	4	1	2018-07-31	298	85	0.52291	19	201	0.0276715	0.122761	2903	114	0.0638872	0.0186785	386	0	1			0	64	376	0	2019-06-08
2018-05-18	4	86	f	N	0	-	4	2	2018-09-30	1266	120	0.6737	35	968	0.0395719	0.165995	2903	114	0.0638872	0.0186785	386	0	1			0	61	376	0	2019-06-08
2018-05-18	4	86	f	N	0	-	4	3	2018-12-25	3200	159	0.643155	39	1934	0.0229057	0.075477	2903	114	0.0638872	0.0186785	386	0	1			0	86	376	0	2019-06-08
2018-05-18	4	86	f	N	0	-	4	4	2019-03-07	2800	170	0.446483	11	-400	0.0065036	-0.0129822	2903	114	0.0638872	0.0186785	386	0	1			0	72	376	0	2019-06-08
2018-05-18	4	86	f	N	0	-	4	5	2019-06-08	3000	180	0.392535	10	200	0.0043022	0.005193	2903	114	0.0638872	0.0186785	386	0	1			0	93	376	0	2019-06-08
2018-05-18	4	87	m	Y	Huu	Neck lateral	4	0	2018-05-28	95	65	0.421739					9905	185	0.0866895	0.0250785	386	0	1					376	0	2019-06-08
2018-05-18	4	87	m	Y	Huu	Neck lateral	4	1	2018-07-31	300	90	0.431959	25	205	0.0355931	0.125771	9905	185	0.0866895	0.0250785	386	0	1			0	64	376	0	2019-06-08
2018-05-18	4	87	m	Y	Huu	Neck lateral	4	2	2018-09-30	1509	136	0.520768	46	1209	0.0473757	0.185376	9905	185	0.0866895	0.0250785	386	0	1			0	61	376	0	2019-06-08
2018-05-18	4	87	m	Y	Huu	Neck lateral	4	3	2018-12-25	3000	168	0.498369	32	1491	0.0171996	0.055932	9905	185	0.0866895	0.0250785	386	0	1			0	86	376	0	2019-06-08
2018-05-18	4	87	m	Y	Huu	Neck lateral	4	4	2019-03-07	5000	195	0.495964	27	2000	0.0144896	0.0496636	9905	185	0.0866895	0.0250785	386	0	1			0	72	376	0	2019-06-08
2018-05-18	4	87	m	Y	Huu	Neck lateral	4	5	2019-06-08	10000	250	0.419882	55	5000	0.0187014	0.0521724	9905	185	0.0866895	0.0250785	386	0	1			0	93	376	0	2019-06-08
2018-05-18	4	88	f	N	0	-	4	0	2018-05-28	133	73	0.395143					10167	177	0.0809757	0.0229176	385	0	1					376	0	2019-06-08
2018-05-18	4	88	f	N	0	-	4	1	2018-07-31	365	98	0.391427	25	232	0.0322118	0.110419	10167	177	0.0809757	0.0229176	385	0	1			0	64	376	0	2019-06-08
2018-05-18	4	88	f	N	0	-	4	2	2018-09-30	1656	140	0.51696	42	1291	0.0409299	0.173538	10167	177	0.0809757	0.0229176	385	0	1			0	61	376	0	2019-06-08
2018-05-18	4	88	f	N	0	-	4	3	2018-12-25	4400	185	0.523647	45	2744	0.022686	0.0795395	10167	177	0.0809757	0.0229176	385	0	1			0	86	376	0	2019-06-08
2018-05-18	4	88	f	N	0	-	4	4	2019-03-07	6900	220	0.450886	35	2500	0.0168459	0.0437419	10167	177	0.0809757	0.0229176	385	0	1			0	72	376	0	2019-06-08
2018-05-18	4	88	f	N	0	-	4	5	2019-06-08	10300	250	0.432479	30	3400	0.0096219	0.0301544	10167	177	0.0809757	0.0229176	385	0	1			0	93	376	0	2019-06-08
2018-05-18	4	89	m	Y	Huu	Neck upper	4	0	2018-05-28	98	63	0.484739					5902	152	0.0766006	0.0228525	386	0	1					376	0	2019-06-08
2018-05-18	4	89	m	Y	Huu	Neck upper	4	1	2018-07-31	314	88	0.488674	25	216	0.0365534	0.127359	5902	152	0.0766006	0.0228525	386	0	1			0	64	376	0	2019-06-08
2018-05-18	4	89	m	Y	Huu	Neck upper	4	2	2018-09-30	1052	114	0.668536	26	738	0.0297054	0.138744	5902	152	0.0766006	0.0228525	386	0	1			0	61	376	0	2019-06-08
2018-05-18	4	89	m	Y	Huu	Neck upper	4	3	2018-12-25	1600	135	0.566455	21	548	0.013762	0.0341299	5902	152	0.0766006	0.0228525	386	0	1			0	86	376	0	2019-06-08
2018-05-18	4	89	m	Y	Huu	Neck upper	4	4	2019-03-07	3000	165	0.530428	30	1400	0.0195097	0.0611147	5902	152	0.0766006	0.0228525	386	0	1			0	72	376	0	2019-06-08
2018-05-18	4	89	m	Y	Huu	Neck upper	4	5	2019-06-08	6000	215	0.424536	50	3000	0.0199231	0.0521724	5902	152	0.0766006	0.0228525	386	0	1			0	93	376	0	2019-06-08
2018-05-18	4	90	m	N	0	-	4	0	2018-05-28	124	71	0.405572					10876	194	0.0835042	0.0245195	386	0	1					376	0	2019-06-08
2018-05-18	4	90	m	N	0	-	4	1	2018-07-31	400	98	0.428961	27	276	0.0352502	0.128098	10876	194	0.0835042	0.0245195	386	0	1			0	64	376	0	2019-06-08
2018-05-18	4	90	m	N	0	-	4	2	2018-09-30	1858	133	0.692658	35	1458	0.0350438	0.176238	10876	194	0.0835042	0.0245195	386	0	1			0	61	376	0	2019-06-08
2018-05-18	4	90	m	N	0	-	4	3	2018-12-25	4200	185	0.499845	52	2342	0.026861	0.0663847	10876	194	0.0835042	0.0245195	386	0	1			0	86	376	0	2019-06-08
2018-05-18	4	90	m	N	0	-	4	4	2019-03-07	6300	215	0.445763	30	2100	0.0146108	0.0394202	10876	194	0.0835042	0.0245195	386	0	1			0	72	376	0	2019-06-08
2018-05-18	4	90	m	N	0	-	4	5	2019-06-08	11000	265	0.377539	50	4700	0.0157381	0.0419507	10876	194	0.0835042	0.0245195	386	0	1			0	93	376	0	2019-06-08
2018-05-18	4	91	f	Y	Huu	Neck upper	4	0	2018-05-28	95	63	0.4699					5905	152	0.0771794	0.0228525	384	0	1					376	0	2019-06-08
2018-05-18	4	91	f	Y	Huu	Neck upper	4	1	2018-07-31	467	93	0.600297	30	372	0.0425977	0.174175	5905	152	0.0771794	0.0228525	384	0	1			0	64	376	0	2019-06-08
2018-05-18	4	91	f	Y	Huu	Neck upper	4	2	2018-09-30	1656	131	0.650581	38	1189	0.0393145	0.145259	5905	152	0.0771794	0.0228525	384	0	1			0	61	376	0	2019-06-08
2018-05-18	4	91	f	Y	Huu	Neck upper	4	3	2018-12-25	4400	177	0.61019	46	2744	0.0244961	0.0795395	5905	152	0.0771794	0.0228525	384	0	1			0	86	376	0	2019-06-08
2018-05-18	4	91	f	Y	Huu	Neck upper	4	4	2019-03-07	6000	200	0.54524	23	1600	0.0118774	0.030154	5905	152	0.0771794	0.0228525	384	0	1			0	72	376	0	2019-06-08
2018-05-18	4	91	f	Y	Huu	Neck upper	4	5	2019-06-08	6000	215	0.424536	15	0	0.0054435	0	5905	152	0.0771794	0.0228525	384	0	1			0	93	376	0	2019-06-08
2018-05-18	4	92	m	N	0	-	4	0	2018-05-28	88	66	0.370562					4412	134	0.0732486	0.02064	386	0	1					376	0	2019-06-08
2018-05-18	4	92	m	N	0	-	4	1	2018-07-31	325	88	0.505794	22	237	0.0314652	0.142897	4412	134	0.0732486	0.02064	386	0	1			0	64	376	0	2019-06-08
2018-05-18	4	92	m	N	0	-	4	2	2018-09-30	1280	128	0.544833	40	955	0.0429976	0.157304	4412	134	0.0732486	0.02064	386	0	1			0	61	376	0	2019-06-08
2018-05-18	4	92	m	N	0	-	4	3	2018-12-25	4800	179	0.64028	51	3520	0.0272964	0.107585	4412	134	0.0732486	0.02064	386	0	1			0	86	376	0	2019-06-08
2018-05-18	4	92	m	N	0	-	4	4	2019-03-07	3800	190	0.412379	11	-1000	0.0057982	-0.0227126	4412	134	0.0732486	0.02064	386	0	1			0	72	376	0	2019-06-08
2018-05-18	4	92	m	N	0	-	4	5	2019-06-08	4500	200	0.40893	10	700	0.0038608	0.0127262	4412	134	0.0732486	0.02064	386	0	1			0	93	376	0	2019-06-08
2018-05-18	4	93	f	Y	Huu	Neck upper	4	0	2018-05-28	102	66	0.429515					6898	169	0.0787257	0.0236423	386	0	1					376	0	2019-06-08
2018-05-18	4	93	f	Y	Huu	Neck upper	4	1	2018-07-31	337	92	0.449701	26	235	0.0363271	0.130715	6898	169	0.0787257	0.0236423	386	0	1			0	64	376	0	2019-06-08
2018-05-18	4	93	f	Y	Huu	Neck upper	4	2	2018-09-30	1365	127	0.596997	35	1028	0.0369966	0.160521	6898	169	0.0787257	0.0236423	386	0	1			0	61	376	0	2019-06-08
2018-05-18	4	93	f	Y	Huu	Neck upper	4	3	2018-12-25	3000	165	0.530428	38	1635	0.0213059	0.0640954	6898	169	0.0787257	0.0236423	386	0	1			0	86	376	0	2019-06-08
2018-05-18	4	93	f	Y	Huu	Neck upper	4	4	2019-03-07	5600	190	0.607716	25	2600	0.013716	0.0606817	6898	169	0.0787257	0.0236423	386	0	1			0	72	376	0	2019-06-08
2018-05-18	4	93	f	Y	Huu	Neck upper	4	5	2019-06-08	7000	235	0.364085	45	1400	0.0159992	0.0167958	6898	169	0.0787257	0.0236423	386	0	1			0	93	376	0	2019-06-08
2018-05-18	4	94	m	N	0	-	4	0	2018-05-28	94	63	0.464954					5906	147	0.0773764	0.0224144	386	0	1					376	0	2019-06-08
2018-05-18	4	94	m	N	0	-	4	1	2018-07-31	301	85	0.528174	22	207	0.0327596	0.127292	5906	147	0.0773764	0.0224144	386	0	1			0	64	376	0	2019-06-08
2018-05-18	4	94	m	N	0	-	4	2	2018-09-30	1255	123	0.613158	38	954	0.0424054	0.163844	5906	147	0.0773764	0.0224144	386	0	1			0	61	376	0	2019-06-08
2018-05-18	4	94	m	N	0	-	4	3	2018-12-25	2600	162	0.489837	39	1345	0.0224173	0.0592864	5906	147	0.0773764	0.0224144	386	0	1			0	86	376	0	2019-06-08
2018-05-18	4	94	m	N	0	-	4	4	2019-03-07	2700	175	0.38945	13	100	0.0075045	0.0036692	5906	147	0.0773764	0.0224144	386	0	1			0	72	376	0	2019-06-08
2018-05-18	4	94	m	N	0	-	4	5	2019-06-08	6000	210	0.460545	35	3300	0.0137231	0.0601027	5906	147	0.0773764	0.0224144	386	0	1			0	93	376	0	2019-06-08
2018-05-18	4	95	f	Y	Huu	Neck lateral	4	0	2018-05-28	126	69	0.454939					3374	136	0.0618874	0.0202721	384	0	1					376	0	2019-06-08
2018-05-18	4	95	f	Y	Huu	Neck lateral	4	1	2018-07-31	474	100	0.474	31	348	0.0405851	0.144914	3374	136	0.0618874	0.0202721	384	0	1			0	64	376	0	2019-06-08
2018-05-18	4	95	f	Y	Huu	Neck lateral	4	2	2018-09-30	1908	142	0.567101	42	1434	0.0402393	0.159807	3374	136	0.0618874	0.0202721	384	0	1			0	61	376	0	2019-06-08
2018-05-18	4	95	f	Y	Huu	Neck lateral	4	3	2018-12-25	4900	193	0.503695	51	2992	0.0249772	0.0767704	3374	136	0.0618874	0.0202721	384	0	1			0	86	376	0	2019-06-08
2018-05-18	4	95	f	Y	Huu	Neck lateral	4	4	2019-03-07	3800	200	0.345318	7	-1100	0.0034638	-0.0247172	3374	136	0.0618874	0.0202721	384	0	1			0	72	376	0	2019-06-08
2018-05-18	4	95	f	Y	Huu	Neck lateral	4	5	2019-06-08	3500	205	0.292011	5	-300	0.0018586	-0.00619	3374	136	0.0618874	0.0202721	384	0	1			0	93	376	0	2019-06-08
2018-05-18	4	96	f	N	0	-	4	0	2018-05-28	84	75	0.227283					3516	125	0.0699604	0.0182601	386	0	1					376	0	2019-06-08
2018-05-18	4	96	f	N	0	-	4	1	2018-07-31	251	80	0.543228	5	167	0.0070589	0.119726	3516	125	0.0699604	0.0182601	386	0	1			0	64	376	0	2019-06-08
2018-05-18	4	96	f	N	0	-	4	2	2018-09-30	991	115	0.611025	35	740	0.0416449	0.157587	3516	125	0.0699604	0.0182601	386	0	1			0	61	376	0	2019-06-08
2018-05-18	4	96	f	N	0	-	4	3	2018-12-25	2200	163	0.405745	48	1209	0.0283922	0.0649126	3516	125	0.0699604	0.0182601	386	0	1			0	86	376	0	2019-06-08
2018-05-18	4	96	f	N	0	-	4	4	2019-03-07	3300	180	0.431789	17	1100	0.0096451	0.0394202	3516	125	0.0699604	0.0182601	386	0	1			0	72	376	0	2019-06-08
2018-05-18	4	96	f	N	0	-	4	5	2019-06-08	3600	200	0.327144	20	300	0.0079304	0.0065492	3516	125	0.0699604	0.0182601	386	0	1			0	93	376	0	2019-06-08
2018-05-18	4	97	m	Y	Huu	Neck lateral	4	0	2018-05-28	84	67	0.335784					9916	178	0.0889805	0.0241382	385	0	1					376	0	2019-06-08
2018-05-18	4	97	m	Y	Huu	Neck lateral	4	1	2018-07-31	264	84	0.482611	17	180	0.0247323	0.125249	9916	178	0.0889805	0.0241382	385	0	1			0	64	376	0	2019-06-08
2018-05-18	4	97	m	Y	Huu	Neck lateral	4	2	2018-09-30	1316	120	0.700307	36	1052	0.0409299	0.184341	9916	178	0.0889805	0.0241382	385	0	1			0	61	376	0	2019-06-08
2018-05-18	4	97	m	Y	Huu	Neck lateral	4	3	2018-12-25	4000	179	0.533566	59	2684	0.0325495	0.090487	9916	178	0.0889805	0.0241382	385	0	1			0	86	376	0	2019-06-08
2018-05-18	4	97	m	Y	Huu	Neck lateral	4	4	2019-03-07	4800	205	0.400473	26	800	0.0131857	0.0177257	9916	178	0.0889805	0.0241382	385	0	1			0	72	376	0	2019-06-08
2018-05-18	4	97	m	Y	Huu	Neck lateral	4	5	2019-06-08	10000	245	0.450283	40	5200	0.0134165	0.055245	9916	178	0.0889805	0.0241382	385	0	1			0	93	376	0	2019-06-08
2018-05-18	4	98	f	N	0	-	4	0	2018-05-28	94	65	0.417299					10906	190	0.0886609	0.0254472	385	0	1					376	0	2019-06-08
2018-05-18	4	98	f	N	0	-	4	1	2018-07-31	434	92	0.57914	27	340	0.037997	0.167316	10906	190	0.0886609	0.0254472	385	0	1			0	64	376	0	2019-06-08
2018-05-18	4	98	f	N	0	-	4	2	2018-09-30	1676	135	0.593361	43	1242	0.0440066	0.155047	10906	190	0.0886609	0.0254472	385	0	1			0	61	376	0	2019-06-08
2018-05-18	4	98	f	N	0	-	4	3	2018-12-25	5300	194	0.535158	59	3624	0.0295126	0.0937102	10906	190	0.0886609	0.0254472	385	0	1			0	86	376	0	2019-06-08
2018-05-18	4	98	f	N	0	-	4	4	2019-03-07	7800	220	0.509697	26	2500	0.0122276	0.0375683	10906	190	0.0886609	0.0254472	385	0	1			0	72	376	0	2019-06-08
2018-05-18	4	98	f	N	0	-	4	5	2019-06-08	11000	255	0.431284	35	3200	0.0111124	0.0258753	10906	190	0.0886609	0.0254472	385	0	1			0	93	376	0	2019-06-08
2018-05-18	4	99	m	Y	Huu	Neck lateral	4	0	2018-05-28	77	64	0.360668					6423	166	0.0825805	0.0238148	385	0	1					376	0	2019-06-08
2018-05-18	4	99	m	Y	Huu	Neck lateral	4	1	2018-07-31	222	81	0.460251	17	145	0.025765	0.115814	6423	166	0.0825805	0.0238148	385	0	1			0	64	376	0	2019-06-08
2018-05-18	4	99	m	Y	Huu	Neck lateral	4	2	2018-09-30	1058	117	0.614558	36	836	0.0421979	0.179184	6423	166	0.0825805	0.0238148	385	0	1			0	61	376	0	2019-06-08
2018-05-18	4	99	m	Y	Huu	Neck lateral	4	3	2018-12-25	3800	178	0.516809	61	2742	0.0341543	0.104074	6423	166	0.0825805	0.0238148	385	0	1			0	86	376	0	2019-06-08
2018-05-18	4	99	m	Y	Huu	Neck lateral	4	4	2019-03-07	5000	200	0.454366	22	1200	0.0113297	0.0266814	6423	166	0.0825805	0.0238148	385	0	1			0	72	376	0	2019-06-08
2018-05-18	4	99	m	Y	Huu	Neck lateral	4	5	2019-06-08	6500	230	0.364196	30	1500	0.0105197	0.0197478	6423	166	0.0825805	0.0238148	385	0	1			0	93	376	0	2019-06-08
2018-05-18	4	100	m	N	0	-	4	0	2018-05-28	97	67	0.387751					7603	163	0.0814358	0.022962	386	0	1					376	0	2019-06-08
2018-05-18	4	100	m	N	0	-	4	1	2018-07-31	323	87	0.522957	20	226	0.0285704	0.131572	7603	163	0.0814358	0.022962	386	0	1			0	64	376	0	2019-06-08
2018-05-18	4	100	m	N	0	-	4	2	2018-09-30	1250	122	0.62821	35	927	0.0387998	0.155291	7603	163	0.0814358	0.022962	386	0	1			0	61	376	0	2019-06-08
2018-05-18	4	100	m	N	0	-	4	3	2018-12-25	3000	169	0.48824	47	1750	0.0265249	0.0712591	7603	163	0.0814358	0.022962	386	0	1			0	86	376	0	2019-06-08
2018-05-18	4	100	m	N	0	-	4	4	2019-03-07	3600	185	0.428438	16	600	0.0087944	0.0177257	7603	163	0.0814358	0.022962	386	0	1			0	72	376	0	2019-06-08
2018-05-18	4	100	m	N	0	-	4	5	2019-06-08	7700	230	0.431432	45	4100	0.0163878	0.0572259	7603	163	0.0814358	0.022962	386	0	1			0	93	376	0	2019-06-08
2018-05-18	4	101	m	Y	Huu	Neck upper	5	0	2018-05-28	104	67	0.415733					9396	178	0.0840494	0.0241382	386	0	1					376	0	2019-06-08
2018-05-18	4	101	m	Y	Huu	Neck upper	5	1	2018-07-31	298	86	0.502171	19	194	0.027306	0.115139	9396	178	0.0840494	0.0241382	386	0	1			0	64	376	0	2019-06-08
2018-05-18	4	101	m	Y	Huu	Neck upper	5	2	2018-09-30	1654	129	0.685323	43	1356	0.0465288	0.196672	9396	178	0.0840494	0.0241382	386	0	1			0	61	376	0	2019-06-08
2018-05-18	4	101	m	Y	Huu	Neck upper	5	3	2018-12-25	5000	180	0.654225	51	3346	0.0271164	0.0900429	9396	178	0.0840494	0.0241382	386	0	1			0	86	376	0	2019-06-08
2018-05-18	4	101	m	Y	Huu	Neck upper	5	4	2019-03-07	7000	210	0.537303	30	2000	0.0149869	0.0327126	9396	178	0.0840494	0.0241382	386	0	1			0	72	376	0	2019-06-08
2018-05-18	4	101	m	Y	Huu	Neck upper	5	5	2019-06-08	9500	245	0.427769	35	2500	0.0116027	0.0229857	9396	178	0.0840494	0.0241382	386	0	1			0	93	376	0	2019-06-08
2018-05-18	4	102	f	N	0	-	5	0	2018-05-28	80	65	0.355148					4920	150	0.0769845	0.0222706	384	0	1					376	0	2019-06-08
2018-05-18	4	102	f	N	0	-	5	1	2018-07-31	294	84	0.537454	19	214	0.028047	0.142357	4920	150	0.0769845	0.0222706	384	0	1			0	64	376	0	2019-06-08
2018-05-18	4	102	f	N	0	-	5	2	2018-09-30	1020	112	0.689137	28	726	0.0330127	0.142752	4920	150	0.0769845	0.0222706	384	0	1			0	61	376	0	2019-06-08
2018-05-18	4	102	f	N	0	-	5	3	2018-12-25	3000	173	0.450279	61	1980	0.0353901	0.0878101	4920	150	0.0769845	0.0222706	384	0	1			0	86	376	0	2019-06-08
2018-05-18	4	102	f	N	0	-	5	4	2019-03-07	5000	200	0.454366	27	2000	0.0140997	0.0496636	4920	150	0.0769845	0.0222706	384	0	1			0	72	376	0	2019-06-08
2018-05-18	4	102	f	N	0	-	5	5	2019-06-08	5000	215	0.35378	15	0	0.0054435	0	4920	150	0.0769845	0.0222706	384	0	1			0	93	376	0	2019-06-08
2018-05-18	4	103	m	Y	Huu	Neck upper	5	0	2018-05-28	81	64	0.379404					5119	161	0.0774834	0.0234056	386	0	1					376	0	2019-06-08
2018-05-18	4	103	m	Y	Huu	Neck upper	5	1	2018-07-31	283	82	0.562329	18	202	0.0271071	0.136828	5119	161	0.0774834	0.0234056	386	0	1			0	64	376	0	2019-06-08
2018-05-18	4	103	m	Y	Huu	Neck upper	5	2	2018-09-30	1120	116	0.670183	34	837	0.0398049	0.15786	5119	161	0.0774834	0.0234056	386	0	1			0	61	376	0	2019-06-08
2018-05-18	4	103	m	Y	Huu	Neck upper	5	3	2018-12-25	2800	160	0.550685	44	1680	0.0261754	0.0745818	5119	161	0.0774834	0.0234056	386	0	1			0	86	376	0	2019-06-08
2018-05-18	4	103	m	Y	Huu	Neck upper	5	4	2019-03-07	4500	195	0.446368	35	1700	0.0192331	0.0461279	5119	161	0.0774834	0.0234056	386	0	1			0	72	376	0	2019-06-08
2018-05-18	4	103	m	Y	Huu	Neck upper	5	5	2019-06-08	5200	225	0.314378	30	700	0.010771	0.0108825	5119	161	0.0774834	0.0234056	386	0	1			0	93	376	0	2019-06-08
2018-05-18	4	104	m	N	0	-	5	0	2018-05-28	127	73	0.377317					7873	167	0.0771305	0.0221576	385	0	1					376	0	2019-06-08
2018-05-18	4	104	m	N	0	-	5	1	2018-07-31	568	102	0.530386	29	441	0.0365874	0.163837	7873	167	0.0771305	0.0221576	385	0	1			0	64	376	0	2019-06-08
2018-05-18	4	104	m	N	0	-	5	2	2018-09-30	1957	148	0.504063	46	1389	0.042716	0.141956	7873	167	0.0771305	0.0221576	385	0	1			0	61	376	0	2019-06-08
2018-05-18	4	104	m	N	0	-	5	3	2018-12-25	5200	195	0.515803	47	3243	0.0224478	0.0795433	7873	167	0.0771305	0.0221576	385	0	1			0	86	376	0	2019-06-08
2018-05-18	4	104	m	N	0	-	5	4	2019-03-07	8400	230	0.470653	35	3200	0.0160494	0.0466252	7873	167	0.0771305	0.0221576	385	0	1			0	72	376	0	2019-06-08
2018-05-18	4	104	m	N	0	-	5	5	2019-06-08	8000	240	0.386865	10	-400	0.0032034	-0.0036724	7873	167	0.0771305	0.0221576	385	0	1			0	93	376	0	2019-06-08
2018-05-18	4	105	f	Y	Huu	Neck upper	5	0	2018-05-28	89	67	0.355772					7111	168	0.0817883	0.0233624	384	0	1					376	0	2019-06-08
2018-05-18	4	105	f	Y	Huu	Neck upper	5	1	2018-07-31	242	76	0.625461	9	153	0.0137857	0.109408	7111	168	0.0817883	0.0233624	384	0	1			0	64	376	0	2019-06-08
2018-05-18	4	105	f	Y	Huu	Neck upper	5	2	2018-09-30	1009	104	0.880959	28	767	0.0359935	0.163843	7111	168	0.0817883	0.0233624	384	0	1			0	61	376	0	2019-06-08
2018-05-18	4	105	f	Y	Huu	Neck upper	5	3	2018-12-25	3400	167	0.576607	63	2391	0.0385491	0.0988804	7111	168	0.0817883	0.0233624	384	0	1			0	86	376	0	2019-06-08
2018-05-18	4	105	f	Y	Huu	Neck upper	5	4	2019-03-07	5000	200	0.454366	33	1600	0.0175315	0.037495	7111	168	0.0817883	0.0233624	384	0	1			0	72	376	0	2019-06-08
2018-05-18	4	105	f	Y	Huu	Neck upper	5	5	2019-06-08	7200	235	0.374488	35	2200	0.0121385	0.0274463	7111	168	0.0817883	0.0233624	384	0	1			0	93	376	0	2019-06-08
2018-05-19	5	106	m	N	0	-	5	0	2018-05-28	103	63	0.50947					2397	132	0.0593756	0.0210347	385	0	1					376	0	2019-06-08
2018-05-19	5	106	m	N	0	-	5	1	2018-07-31	473	90	0.681055	27	370	0.0390113	0.166728	2397	132	0.0593756	0.0210347	385	0	1			0	64	376	0	2019-06-08
2018-05-19	5	106	m	N	0	-	5	2	2018-09-30	1770	128	0.753402	38	1297	0.0404188	0.151434	2397	132	0.0593756	0.0210347	385	0	1			0	61	376	0	2019-06-08
2018-05-19	5	106	m	N	0	-	5	3	2018-12-25	4100	188	0.461528	60	2330	0.0312893	0.0683727	2397	132	0.0593756	0.0210347	385	0	1			0	86	376	0	2019-06-08
2018-05-19	5	106	m	N	0	-	5	4	2019-03-07	3200	190	0.347266	2	-900	0.0010288	-0.0240952	2397	132	0.0593756	0.0210347	385	0	1			0	72	376	0	2019-06-08
2018-05-19	5	106	m	N	0	-	5	5	2019-06-08	2500	195	0.247982	5	-700	0.0019551	-0.0185809	2397	132	0.0593756	0.0210347	385	0	1			0	93	376	0	2019-06-08
2018-05-19	5	107	f	Y	Huu	Neck upper	5	0	2018-05-28	93	63	0.460007									78	1	0	2018-08-05				376	1	2018-08-05
2018-05-19	5	107	f	Y	Huu	Neck upper	5	1	2018-07-31	79	63	0.390759	0	-14	0	-0.0178447					78	1	0	2018-08-05		0	64	376	1	2018-08-05
2018-05-19	5	107	f	Y	Huu	Neck upper	5	2	2018-09-30												78	1	0	2018-08-05	2018-08-05	1	61	376	1	2018-08-05
2018-05-19	5	107	f	Y	Huu	Neck upper	5	3	2018-12-25												78	1	0	2018-08-05		0	86	376	1	2018-08-05
2018-05-19	5	107	f	Y	Huu	Neck upper	5	4	2019-03-07												78	1	0	2018-08-05		0	72	376	1	2018-08-05
2018-05-19	5	107	f	Y	Huu	Neck upper	5	5	2019-06-08												78	1	0	2018-08-05		0	93	376	1	2018-08-05
2018-05-19	5	108	f	N	0	-	5	0	2018-05-28	113	71	0.369594					7087	164	0.0773435	0.0222828	386	0	1					376	0	2019-06-08
2018-05-19	5	108	f	N	0	-	5	1	2018-07-31	387	95	0.462155	24	274	0.0318497	0.134645	7087	164	0.0773435	0.0222828	386	0	1			0	64	376	0	2019-06-08
2018-05-19	5	108	f	N	0	-	5	2	2018-09-30	1205	120	0.641239	25	818	0.0268083	0.130339	7087	164	0.0773435	0.0222828	386	0	1			0	61	376	0	2019-06-08
2018-05-19	5	108	f	N	0	-	5	3	2018-12-25	4000	177	0.554718	57	2795	0.031635	0.0976593	7087	164	0.0773435	0.0222828	386	0	1			0	86	376	0	2019-06-08
2018-05-19	5	108	f	N	0	-	5	4	2019-03-07	7200	220	0.47049	43	3200	0.0211437	0.0571459	7087	164	0.0773435	0.0222828	386	0	1			0	72	376	0	2019-06-08
2018-05-19	5	108	f	N	0	-	5	5	2019-06-08	7200	235	0.374488	15	0	0.0049646	0	7087	164	0.0773435	0.0222828	386	0	1			0	93	376	0	2019-06-08
2018-05-19	5	109	f	Y	Huu	Neck upper	5	0	2018-05-28	93	68	0.353185					8707	172	0.0847057	0.0234785	384	0	1					376	0	2019-06-08
2018-05-19	5	109	f	Y	Huu	Neck upper	5	1	2018-07-31	188	73	0.558548	5	95	0.0077603	0.0769828	8707	172	0.0847057	0.0234785	384	0	1			0	64	376	0	2019-06-08
2018-05-19	5	109	f	Y	Huu	Neck upper	5	2	2018-09-30	943	109	0.699868	36	755	0.0460036	0.185055	8707	172	0.0847057	0.0234785	384	0	1			0	61	376	0	2019-06-08
2018-05-19	5	109	f	Y	Huu	Neck upper	5	3	2018-12-25	3700	172	0.566596	63	2757	0.0371282	0.111269	8707	172	0.0847057	0.0234785	384	0	1			0	86	376	0	2019-06-08
2018-05-19	5	109	f	Y	Huu	Neck upper	5	4	2019-03-07	6000	200	0.54524	28	2300	0.0146633	0.0469998	8707	172	0.0847057	0.0234785	384	0	1			0	72	376	0	2019-06-08
2018-05-19	5	109	f	Y	Huu	Neck upper	5	5	2019-06-08	8800	240	0.425551	40	2800	0.0137231	0.0288274	8707	172	0.0847057	0.0234785	384	0	1			0	93	376	0	2019-06-08
2018-05-19	5	110	f	N	0	-	5	0	2018-05-28	100	64	0.4684					10300	186	0.0864647	0.0253671	386	0	1					376	0	2019-06-08
2018-05-19	5	110	f	N	0	-	5	1	2018-07-31	158	73	0.469418	9	58	0.0143912	0.0500308	10300	186	0.0864647	0.0253671	386	0	1			0	64	376	0	2019-06-08
2018-05-19	5	110	f	N	0	-	5	2	2018-09-30	1864	136	0.643282	63	1706	0.0713995	0.2832	10300	186	0.0864647	0.0253671	386	0	1			0	61	376	0	2019-06-08
2018-05-19	5	110	f	N	0	-	5	3	2018-12-25	4300	173	0.6454	37	2436	0.0195867	0.0680376	10300	186	0.0864647	0.0253671	386	0	1			0	86	376	0	2019-06-08
2018-05-19	5	110	f	N	0	-	5	4	2019-03-07	5800	200	0.527065	27	1500	0.0140997	0.0290931	10300	186	0.0864647	0.0253671	386	0	1			0	72	376	0	2019-06-08
2018-05-19	5	110	f	N	0	-	5	5	2019-06-08	10400	250	0.436678	50	4600	0.0167958	0.0439531	10300	186	0.0864647	0.0253671	386	0	1			0	93	376	0	2019-06-08
2018-05-19	5	111	m	Y	Huu	Neck lateral	5	0	2018-05-28	114	70	0.391621					6186	165	0.0746935	0.0225469	385	0	1					376	0	2019-06-08
2018-05-19	5	111	m	Y	Huu	Neck lateral	5	1	2018-07-31	308	83	0.586868	13	194	0.0186315	0.108708	6186	165	0.0746935	0.0225469	385	0	1			0	64	376	0	2019-06-08
2018-05-19	5	111	m	Y	Huu	Neck lateral	5	2	2018-09-30	1180	122	0.593031	39	872	0.044201	0.154134	6186	165	0.0746935	0.0225469	385	0	1			0	61	376	0	2019-06-08
2018-05-19	5	111	m	Y	Huu	Neck lateral	5	3	2018-12-25	3000	165	0.530428	43	1820	0.0245752	0.0759498	6186	165	0.0746935	0.0225469	385	0	1			0	86	376	0	2019-06-08
2018-05-19	5	111	m	Y	Huu	Neck lateral	5	4	2019-03-07	4500	195	0.446368	30	1500	0.0162414	0.0394202	6186	165	0.0746935	0.0225469	385	0	1			0	72	376	0	2019-06-08
2018-05-19	5	111	m	Y	Huu	Neck lateral	5	5	2019-06-08	6300	235	0.327677	40	1800	0.0140441	0.0253259	6186	165	0.0746935	0.0225469	385	0	1			0	93	376	0	2019-06-08
2018-05-19	5	112	f	N	0	-	5	0	2018-05-28	74	63	0.366027					7426	167	0.0859844	0.024108	384	0	1					376	0	2019-06-08
2018-05-19	5	112	f	N	0	-	5	1	2018-07-31	198	73	0.588258	10	124	0.0161136	0.107647	7426	167	0.0859844	0.024108	384	0	1			0	64	376	0	2019-06-08
2018-05-19	5	112	f	N	0	-	5	2	2018-09-30	1180	107	0.933715	34	982	0.0438785	0.204836	7426	167	0.0859844	0.024108	384	0	1			0	61	376	0	2019-06-08
2018-05-19	5	112	f	N	0	-	5	3	2018-12-25	3800	175	0.548115	68	2620	0.040043	0.0951908	7426	167	0.0859844	0.024108	384	0	1			0	86	376	0	2019-06-08
2018-05-19	5	112	f	N	0	-	5	4	2019-03-07	5500	200	0.499803	25	1700	0.0129822	0.0359476	7426	167	0.0859844	0.024108	384	0	1			0	72	376	0	2019-06-08
2018-05-19	5	112	f	N	0	-	5	5	2019-06-08	7500	230	0.420226	30	2000	0.0105197	0.023345	7426	167	0.0859844	0.024108	384	0	1			0	93	376	0	2019-06-08
2018-05-19	5	113	f	Y	Huu	Neck upper	5	0	2018-05-28	115	71	0.376135					1685	109	0.0512082	0.017319	385	0	1					376	0	2019-06-08
2018-05-19	5	113	f	Y	Huu	Neck upper	5	1	2018-07-31	356	100	0.356	29	241	0.0374599	0.123594	1685	109	0.0512082	0.017319	385	0	1			0	64	376	0	2019-06-08
2018-05-19	5	113	f	Y	Huu	Neck upper	5	2	2018-09-30	1920	137	0.646023	37	1564	0.0361258	0.193378	1685	109	0.0512082	0.017319	385	0	1			0	61	376	0	2019-06-08
2018-05-19	5	113	f	Y	Huu	Neck upper	5	3	2018-12-25	3000	165	0.530428	28	1080	0.0151366	0.0363257	1685	109	0.0512082	0.017319	385	0	1			0	86	376	0	2019-06-08
2018-05-19	5	113	f	Y	Huu	Neck upper	5	4	2019-03-07	2400	175	0.346178	10	-600	0.0057206	-0.0216945	1685	109	0.0512082	0.017319	385	0	1			0	72	376	0	2019-06-08
2018-05-19	5	113	f	Y	Huu	Neck upper	5	5	2019-06-08	1800	180	0.235521	5	-600	0.0021204	-0.0216535	1685	109	0.0512082	0.017319	385	0	1			0	93	376	0	2019-06-08
2018-05-19	5	114	f	N	0	-	5	0	2018-05-28	122	74	0.345795					6078	161	0.0731329	0.0215123	384	0	1					376	0	2019-06-08
2018-05-19	5	114	f	N	0	-	5	1	2018-07-31	210	81	0.435373	7	88	0.0098858	0.0594001	6078	161	0.0731329	0.0215123	384	0	1			0	64	376	0	2019-06-08
2018-05-19	5	114	f	N	0	-	5	2	2018-09-30	1030	110	0.740659	29	820	0.0351183	0.182483	6078	161	0.0731329	0.0215123	384	0	1			0	61	376	0	2019-06-08
2018-05-19	5	114	f	N	0	-	5	3	2018-12-25	3300	163	0.608618	53	2270	0.0320103	0.0947738	6078	161	0.0731329	0.0215123	384	0	1			0	86	376	0	2019-06-08
2018-05-19	5	114	f	N	0	-	5	4	2019-03-07	5300	210	0.406815	47	2000	0.024632	0.0460624	6078	161	0.0731329	0.0215123	384	0	1			0	72	376	0	2019-06-08
2018-05-19	5	114	f	N	0	-	5	5	2019-06-08	6200	235	0.322476	25	900	0.0084661	0.0118053	6078	161	0.0731329	0.0215123	384	0	1			0	93	376	0	2019-06-08
2018-05-19	5	115	f	Y	Huu	Neck upper	5	0	2018-05-28	114	73	0.338694					6386	152	0.0752753	0.0209561	385	0	1					376	0	2019-06-08
2018-05-19	5	115	f	Y	Huu	Neck upper	5	1	2018-07-31	332	86	0.559466	13	218	0.0179252	0.116915	6386	152	0.0752753	0.0209561	385	0	1			0	64	376	0	2019-06-08
2018-05-19	5	115	f	Y	Huu	Neck upper	5	2	2018-09-30	1013	100	1.013	14	681	0.0173075	0.128012	6386	152	0.0752753	0.0209561	385	0	1			0	61	376	0	2019-06-08
2018-05-19	5	115	f	Y	Huu	Neck upper	5	3	2018-12-25	2000	158	0.410844	58	987	0.0372323	0.0553676	6386	152	0.0752753	0.0209561	385	0	1			0	86	376	0	2019-06-08
2018-05-19	5	115	f	Y	Huu	Neck upper	5	4	2019-03-07	3700	175	0.533691	17	1700	0.0099352	0.0598097	6386	152	0.0752753	0.0209561	385	0	1			0	72	376	0	2019-06-08
2018-05-19	5	115	f	Y	Huu	Neck upper	5	5	2019-06-08	6500	225	0.392972	50	2800	0.0189161	0.0424117	6386	152	0.0752753	0.0209561	385	0	1			0	93	376	0	2019-06-08
2018-05-19	5	116	f	N	0	-	5	0	2018-05-28	96	65	0.426178					3704	135	0.068481	0.0209242	385	0	1					376	0	2019-06-08
2018-05-19	5	116	f	N	0	-	5	1	2018-07-31	166	72	0.517294	7	70	0.0111867	0.0598981	3704	135	0.068481	0.0209242	385	0	1			0	64	376	0	2019-06-08
2018-05-19	5	116	f	N	0	-	5	2	2018-09-30	1587	128	0.675508	56	1421	0.0660254	0.25907	3704	135	0.068481	0.0209242	385	0	1			0	61	376	0	2019-06-08
2018-05-19	5	116	f	N	0	-	5	3	2018-12-25	3000	162	0.565196	34	1413	0.019174	0.0518299	3704	135	0.068481	0.0209242	385	0	1			0	86	376	0	2019-06-08
2018-05-19	5	116	f	N	0	-	5	4	2019-03-07	4300	180	0.562634	18	1300	0.0102434	0.0350003	3704	135	0.068481	0.0209242	385	0	1			0	72	376	0	2019-06-08
2018-05-19	5	116	f	N	0	-	5	5	2019-06-08	3800	200	0.345318	20	-500	0.0079304	-0.0093043	3704	135	0.068481	0.0209242	385	0	1			0	93	376	0	2019-06-08
2018-05-19	5	117	f	Y	Huu	Neck lateral	5	0	2018-05-28	108	69	0.389947					9092	176	0.0827494	0.0235906	384	0	1					376	0	2019-06-08
2018-05-19	5	117	f	Y	Huu	Neck lateral	5	1	2018-07-31	194	74	0.54987	5	86	0.0076517	0.0640639	9092	176	0.0827494	0.0235906	384	0	1			0	64	376	0	2019-06-08
2018-05-19	5	117	f	Y	Huu	Neck lateral	5	2	2018-09-30	1233	122	0.619667	48	1039	0.057372	0.21222	9092	176	0.0827494	0.0235906	384	0	1			0	61	376	0	2019-06-08
2018-05-19	5	117	f	Y	Huu	Neck lateral	5	3	2018-12-25	3900	170	0.621887	48	2667	0.0270051	0.0937289	9092	176	0.0827494	0.0235906	384	0	1			0	86	376	0	2019-06-08
2018-05-19	5	117	f	Y	Huu	Neck lateral	5	4	2019-03-07	6400	195	0.634834	25	2500	0.013339	0.0481563	9092	176	0.0827494	0.0235906	384	0	1			0	72	376	0	2019-06-08
2018-05-19	5	117	f	Y	Huu	Neck lateral	5	5	2019-06-08	9200	245	0.41426	50	2800	0.0171808	0.0273155	9092	176	0.0827494	0.0235906	384	0	1			0	93	376	0	2019-06-08
2018-05-19	5	118	m	N	0	-	5	0	2018-05-28	126	70	0.432844					7274	165	0.0758263	0.0225469	385	0	1					376	0	2019-06-08
2018-05-19	5	118	m	N	0	-	5	1	2018-07-31	305	90	0.439158	20	179	0.0274875	0.0966908	7274	165	0.0758263	0.0225469	385	0	1			0	64	376	0	2019-06-08
2018-05-19	5	118	m	N	0	-	5	2	2018-09-30	1650	123	0.806143	33	1345	0.0358463	0.19373	7274	165	0.0758263	0.0225469	385	0	1			0	61	376	0	2019-06-08
2018-05-19	5	118	m	N	0	-	5	3	2018-12-25	3200	162	0.602876	39	1550	0.0224173	0.0539143	7274	165	0.0758263	0.0225469	385	0	1			0	86	376	0	2019-06-08
2018-05-19	5	118	m	N	0	-	5	4	2019-03-07	4500	195	0.446368	33	1300	0.0180253	0.0331456	7274	165	0.0758263	0.0225469	385	0	1			0	72	376	0	2019-06-08
2018-05-19	5	118	m	N	0	-	5	5	2019-06-08	7400	235	0.38489	40	2900	0.0140441	0.0374389	7274	165	0.0758263	0.0225469	385	0	1			0	93	376	0	2019-06-08
2018-05-19	5	119	m	Y	Huu	Neck upper	5	0	2018-05-28	114	68	0.432936					6386	157	0.0752753	0.022277	385	0	1					376	0	2019-06-08
2018-05-19	5	119	m	Y	Huu	Neck upper	5	1	2018-07-31	249	80	0.5389	12	135	0.0177755	0.0854497	6386	157	0.0752753	0.022277	385	0	1			0	64	376	0	2019-06-08
2018-05-19	5	119	m	Y	Huu	Neck upper	5	2	2018-09-30	926	100	0.926	20	677	0.0256066	0.150721	6386	157	0.0752753	0.022277	385	0	1			0	61	376	0	2019-06-08
2018-05-19	5	119	m	Y	Huu	Neck upper	5	3	2018-12-25	2800	161	0.53894	61	1874	0.0387632	0.090064	6386	157	0.0752753	0.022277	385	0	1			0	86	376	0	2019-06-08
2018-05-19	5	119	m	Y	Huu	Neck upper	5	4	2019-03-07	2800	175	0.403875	14	0	0.0081065	0	6386	157	0.0752753	0.022277	385	0	1			0	72	376	0	2019-06-08
2018-05-19	5	119	m	Y	Huu	Neck upper	5	5	2019-06-08	6500	225	0.392972	50	3700	0.0189161	0.0633901	6386	157	0.0752753	0.022277	385	0	1			0	93	376	0	2019-06-08
2018-05-19	5	120	m	N	0	-	5	0	2018-05-28	85	65	0.377345					9715	190	0.0883841	0.0254472	385	0	1					376	0	2019-06-08
2018-05-19	5	120	m	N	0	-	5	1	2018-07-31	414	95	0.494398	30	329	0.0415067	0.173164	9715	190	0.0883841	0.0254472	385	0	1			0	64	376	0	2019-06-08
2018-05-19	5	120	m	N	0	-	5	2	2018-09-30	1500	123	0.732858	28	1086	0.0296418	0.147729	9715	190	0.0883841	0.0254472	385	0	1			0	61	376	0	2019-06-08
2018-05-19	5	120	m	N	0	-	5	3	2018-12-25	4100	178	0.55761	55	2600	0.0300837	0.0818448	9715	190	0.0883841	0.0254472	385	0	1			0	86	376	0	2019-06-08
2018-05-19	5	120	m	N	0	-	5	4	2019-03-07	6700	210	0.514276	32	2600	0.0160732	0.0477478	9715	190	0.0883841	0.0254472	385	0	1			0	72	376	0	2019-06-08
2018-05-19	5	120	m	N	0	-	5	5	2019-06-08	9800	255	0.384235	45	3100	0.0146139	0.0286228	9715	190	0.0883841	0.0254472	385	0	1			0	93	376	0	2019-06-08
2018-05-19	5	121	f	Y	Huu	Neck lateral	5	0	2018-05-28	100	69	0.361062					8400	171	0.0827089	0.0232067	385	0	1					376	0	2019-06-08
2018-05-19	5	121	f	Y	Huu	Neck lateral	5	1	2018-07-31	140	70	0.480938	1	40	0.0015738	0.0368017	8400	171	0.0827089	0.0232067	385	0	1			0	64	376	0	2019-06-08
2018-05-19	5	121	f	Y	Huu	Neck lateral	5	2	2018-09-30	735	99	0.761009	29	595	0.0397766	0.190288	8400	171	0.0827089	0.0232067	385	0	1			0	61	376	0	2019-06-08
2018-05-19	5	121	f	Y	Huu	Neck lateral	5	3	2018-12-25	3000	161	0.577436	62	2265	0.0395813	0.114482	8400	171	0.0827089	0.0232067	385	0	1			0	86	376	0	2019-06-08
2018-05-19	5	121	f	Y	Huu	Neck lateral	5	4	2019-03-07	5600	195	0.55548	34	2600	0.0186273	0.0606817	8400	171	0.0827089	0.0232067	385	0	1			0	72	376	0	2019-06-08
2018-05-19	5	121	f	Y	Huu	Neck lateral	5	5	2019-06-08	8500	240	0.411044	45	2900	0.0156288	0.0314096	8400	171	0.0827089	0.0232067	385	0	1			0	93	376	0	2019-06-08
2018-05-19	5	122	m	N	0	-	5	0	2018-05-28	123	72	0.383296					7177	168	0.0760216	0.0224144	385	0	1					376	0	2019-06-08
2018-05-19	5	122	m	N	0	-	5	1	2018-07-31	306	83	0.583057	11	183	0.0155503	0.0996845	7177	168	0.0760216	0.0224144	385	0	1			0	64	376	0	2019-06-08
2018-05-19	5	122	m	N	0	-	5	2	2018-09-30	1180	117	0.685423	34	874	0.0393989	0.154882	7177	168	0.0760216	0.0224144	385	0	1			0	61	376	0	2019-06-08
2018-05-19	5	122	m	N	0	-	5	3	2018-12-25	4000	175	0.576963	58	2820	0.0327707	0.0993658	7177	168	0.0760216	0.0224144	385	0	1			0	86	376	0	2019-06-08
2018-05-19	5	122	m	N	0	-	5	4	2019-03-07	7500	210	0.575682	35	3500	0.0177257	0.0611147	7177	168	0.0760216	0.0224144	385	0	1			0	72	376	0	2019-06-08
2018-05-19	5	122	m	N	0	-	5	5	2019-06-08	7300	240	0.353014	30	-200	0.0100508	-0.0020344	7177	168	0.0760216	0.0224144	385	0	1			0	93	376	0	2019-06-08
2018-05-19	5	123	f	Y	Huu	Neck upper	5	0	2018-05-28	111	75	0.300339					12289	200	0.0877964	0.0241888	385	0	1					376	0	2019-06-08
2018-05-19	5	123	f	Y	Huu	Neck upper	5	1	2018-07-31	477	100	0.477	25	366	0.0314652	0.159467	12289	200	0.0877964	0.0241888	385	0	1			0	64	376	0	2019-06-08
2018-05-19	5	123	f	Y	Huu	Neck upper	5	2	2018-09-30	1978	135	0.70028	35	1501	0.0344382	0.163218	12289	200	0.0877964	0.0241888	385	0	1			0	61	376	0	2019-06-08
2018-05-19	5	123	f	Y	Huu	Neck upper	5	3	2018-12-25	4200	188	0.472784	53	2222	0.0269555	0.0612906	12289	200	0.0877964	0.0241888	385	0	1			0	86	376	0	2019-06-08
2018-05-19	5	123	f	Y	Huu	Neck upper	5	4	2019-03-07	8000	230	0.448241	42	3800	0.0196036	0.0626458	12289	200	0.0877964	0.0241888	385	0	1			0	72	376	0	2019-06-08
2018-05-19	5	123	f	Y	Huu	Neck upper	5	5	2019-06-08	12400	275	0.374395	45	4400	0.0134499	0.0329869	12289	200	0.0877964	0.0241888	385	0	1			0	93	376	0	2019-06-08
2018-05-19	5	124	m	N	0	-	5	0	2018-05-28	109	74	0.308947									95	1	0	2018-08-22				376	1	2018-08-22
2018-05-19	5	124	m	N	0	-	5	1	2018-07-31	110	74	0.311782	0	1	0	0.0009989					95	1	0	2018-08-22		0	64	376	1	2018-08-22
2018-05-19	5	124	m	N	0	-	5	2	2018-09-30												95	1	0	2018-08-22	2018-08-22	1	61	376	1	2018-08-22
2018-05-19	5	124	m	N	0	-	5	3	2018-12-25												95	1	0	2018-08-22		0	86	376	1	2018-08-22
2018-05-19	5	124	m	N	0	-	5	4	2019-03-07												95	1	0	2018-08-22		0	72	376	1	2018-08-22
2018-05-19	5	124	m	N	0	-	5	5	2019-06-08												95	1	0	2018-08-22		0	93	376	1	2018-08-22
2018-05-19	5	125	f	Y	Huu	Neck lateral	5	0	2018-05-28	115	72	0.358366					1885	108	0.0531697	0.0170586	385	0	1					376	0	2019-06-08
2018-05-19	5	125	f	Y	Huu	Neck lateral	5	1	2018-07-31	383	99	0.396553	27	268	0.0348309	0.131589	1885	108	0.0531697	0.0170586	385	0	1			0	64	376	0	2019-06-08
2018-05-19	5	125	f	Y	Huu	Neck lateral	5	2	2018-09-30	2018	137	0.678997	38	1635	0.0372791	0.190701	1885	108	0.0531697	0.0170586	385	0	1			0	61	376	0	2019-06-08
2018-05-19	5	125	f	Y	Huu	Neck lateral	5	3	2018-12-25	3000	171	0.468764	34	982	0.0180439	0.0322737	1885	108	0.0531697	0.0170586	385	0	1			0	86	376	0	2019-06-08
2018-05-19	5	125	f	Y	Huu	Neck lateral	5	4	2019-03-07	2600	180	0.340197	9	-400	0.0049868	-0.0139126	1885	108	0.0531697	0.0170586	385	0	1			0	72	376	0	2019-06-08
2018-05-19	5	125	f	Y	Huu	Neck lateral	5	5	2019-06-08	2000	180	0.26169	0	-600	0	-0.0197478	1885	108	0.0531697	0.0170586	385	0	1			0	93	376	0	2019-06-08
2018-05-19	5	126	m	N	0	-	6	0	2018-05-28	96	62	0.501876									260	1	0	2019-02-03				376	1	2019-02-03
2018-05-19	5	126	m	N	0	-	6	1	2018-07-31	335	82	0.665655	20	239	0.0305796	0.136695					260	1	0	2019-02-03		0	64	376	1	2019-02-03
2018-05-19	5	126	m	N	0	-	6	2	2018-09-30	1633	130	0.658783	48	1298	0.0528804	0.181776					260	1	0	2019-02-03		0	61	376	1	2019-02-03
2018-05-19	5	126	m	N	0	-	6	3	2018-12-25	3000	160	0.590019	30	1367	0.0169009	0.0495041					260	1	0	2019-02-03		0	86	376	1	2019-02-03
2018-05-19	5	126	m	N	0	-	6	4	2019-03-07												260	1	0	2019-02-03	2019-02-03	1	72	376	1	2019-02-03
2018-05-19	5	126	m	N	0	-	6	5	2019-06-08												260	1	0	2019-02-03		0	93	376	1	2019-02-03
2018-05-19	5	127	f	Y	Huu	Neck upper	6	0	2018-05-28	124	75	0.335513					5876	145	0.0722198	0.0200345	384	0	1					376	0	2019-06-08
2018-05-19	5	127	f	Y	Huu	Neck upper	6	1	2018-07-31	420	95	0.501563	20	296	0.025855	0.133435	5876	145	0.0722198	0.0200345	384	0	1			0	64	376	0	2019-06-08
2018-05-19	5	127	f	Y	Huu	Neck upper	6	2	2018-09-30	1780	132	0.681137	37	1360	0.0377455	0.165718	5876	145	0.0722198	0.0200345	384	0	1			0	61	376	0	2019-06-08
2018-05-19	5	127	f	Y	Huu	Neck upper	6	3	2018-12-25	5600	190	0.607716	58	3820	0.029646	0.0932915	5876	145	0.0722198	0.0200345	384	0	1			0	86	376	0	2019-06-08
2018-05-19	5	127	f	Y	Huu	Neck upper	6	4	2019-03-07	6200	210	0.475897	20	600	0.0097303	0.0098955	5876	145	0.0722198	0.0200345	384	0	1			0	72	376	0	2019-06-08
2018-05-19	5	127	f	Y	Huu	Neck upper	6	5	2019-06-08	6000	220	0.392075	10	-200	0.0035015	-0.0024681	5876	145	0.0722198	0.0200345	384	0	1			0	93	376	0	2019-06-08
2018-05-19	5	128	m	N	0	-	6	0	2018-05-28	115	72	0.358366					8285	188	0.0798867	0.0239045	385	0	1					376	0	2019-06-08
2018-05-19	5	128	m	N	0	-	6	1	2018-07-31	486	94	0.602024	22	371	0.0291625	0.15764	8285	188	0.0798867	0.0239045	385	0	1			0	64	376	0	2019-06-08
2018-05-19	5	128	m	N	0	-	6	2	2018-09-30	1438	126	0.646363	32	952	0.0336215	0.124485	8285	188	0.0798867	0.0239045	385	0	1			0	61	376	0	2019-06-08
2018-05-19	5	128	m	N	0	-	6	3	2018-12-25	3800	182	0.47856	56	2362	0.0299311	0.0790958	8285	188	0.0798867	0.0239045	385	0	1			0	86	376	0	2019-06-08
2018-05-19	5	128	m	N	0	-	6	4	2019-03-07	5500	220	0.359402	38	1700	0.0184354	0.0359476	8285	188	0.0798867	0.0239045	385	0	1			0	72	376	0	2019-06-08
2018-05-19	5	128	m	N	0	-	6	5	2019-06-08	8400	260	0.307944	40	2900	0.012574	0.0318751	8285	188	0.0798867	0.0239045	385	0	1			0	93	376	0	2019-06-08
2018-05-19	5	129	f	Y	Huu	Neck upper	6	0	2018-05-28	103	66	0.433726					8397	164	0.0821586	0.0232419	386	0	1					376	0	2019-06-08
2018-05-19	5	129	f	Y	Huu	Neck upper	6	1	2018-07-31	425	94	0.526461	28	322	0.0386794	0.155024	8397	164	0.0821586	0.0232419	386	0	1			0	64	376	0	2019-06-08
2018-05-19	5	129	f	Y	Huu	Neck upper	6	2	2018-09-30	1580	131	0.620724	37	1155	0.0380872	0.150683	8397	164	0.0821586	0.0232419	386	0	1			0	61	376	0	2019-06-08
2018-05-19	5	129	f	Y	Huu	Neck upper	6	3	2018-12-25	5500	185	0.654559	54	3920	0.0280943	0.101526	8397	164	0.0821586	0.0232419	386	0	1			0	86	376	0	2019-06-08
2018-05-19	5	129	f	Y	Huu	Neck upper	6	4	2019-03-07	8300	220	0.54237	35	2800	0.0168459	0.0400077	8397	164	0.0821586	0.0232419	386	0	1			0	72	376	0	2019-06-08
2018-05-19	5	129	f	Y	Huu	Neck upper	6	5	2019-06-08	8500	230	0.476256	10	200	0.0033458	0.0017922	8397	164	0.0821586	0.0232419	386	0	1			0	93	376	0	2019-06-08
2018-05-19	5	130	f	N	0	-	6	0	2018-05-28	90	62	0.470508					7410	163	0.0823403	0.0239967	385	0	1					376	0	2019-06-08
2018-05-19	5	130	f	N	0	-	6	1	2018-07-31	450	88	0.70033	26	360	0.0383034	0.176032	7410	163	0.0823403	0.0239967	385	0	1			0	64	376	0	2019-06-08
2018-05-19	5	130	f	N	0	-	6	2	2018-09-30	1672	138	0.548598	50	1222	0.0516298	0.150618	7410	163	0.0823403	0.0239967	385	0	1			0	61	376	0	2019-06-08
2018-05-19	5	130	f	N	0	-	6	3	2018-12-25	3800	177	0.526982	39	2128	0.020259	0.066824	7410	163	0.0823403	0.0239967	385	0	1			0	86	376	0	2019-06-08
2018-05-19	5	130	f	N	0	-	6	4	2019-03-07	5100	195	0.505883	18	1300	0.009416	0.0286066	7410	163	0.0823403	0.0239967	385	0	1			0	72	376	0	2019-06-08
2018-05-19	5	130	f	N	0	-	6	5	2019-06-08	7500	225	0.453429	30	2400	0.010771	0.0290284	7410	163	0.0823403	0.0239967	385	0	1			0	93	376	0	2019-06-08
2018-05-19	5	131	f	Y	Huu	Neck upper	6	0	2018-05-28	88	62	0.460052					13112	208	0.0932831	0.027391	384	0	1					376	0	2019-06-08
2018-05-19	5	131	f	Y	Huu	Neck upper	6	1	2018-07-31	311	85	0.545721	23	223	0.0345097	0.138081	13112	208	0.0932831	0.027391	384	0	1			0	64	376	0	2019-06-08
2018-05-19	5	131	f	Y	Huu	Neck upper	6	2	2018-09-30	1300	120	0.691793	35	989	0.0395719	0.164136	13112	208	0.0932831	0.027391	384	0	1			0	61	376	0	2019-06-08
2018-05-19	5	131	f	Y	Huu	Neck upper	6	3	2018-12-25	4900	180	0.641141	60	3600	0.033003	0.108001	13112	208	0.0932831	0.027391	384	0	1			0	86	376	0	2019-06-08
2018-05-19	5	131	f	Y	Huu	Neck upper	6	4	2019-03-07	7600	220	0.496628	40	2700	0.0195097	0.0426721	13112	208	0.0932831	0.027391	384	0	1			0	72	376	0	2019-06-08
2018-05-19	5	131	f	Y	Huu	Neck upper	6	5	2019-06-08	13200	270	0.424674	50	5600	0.0154146	0.0415535	13112	208	0.0932831	0.027391	384	0	1			0	93	376	0	2019-06-08
2018-05-19	6	132	m	N	0	-	6	0	2018-05-28	113	74	0.320285					8287	171	0.0802133	0.0222882	385	0	1					376	0	2019-06-08
2018-05-19	6	132	m	N	0	-	6	1	2018-07-31	367	90	0.528429	16	254	0.0214096	0.128841	8287	171	0.0802133	0.0222882	385	0	1			0	64	376	0	2019-06-08
2018-05-19	6	132	m	N	0	-	6	2	2018-09-30	1854	135	0.656379	45	1487	0.0465288	0.185872	8287	171	0.0802133	0.0222882	385	0	1			0	61	376	0	2019-06-08
2018-05-19	6	132	m	N	0	-	6	3	2018-12-25	4400	181	0.564787	46	2546	0.0238669	0.0703467	8287	171	0.0802133	0.0222882	385	0	1			0	86	376	0	2019-06-08
2018-05-19	6	132	m	N	0	-	6	4	2019-03-07	5200	210	0.399139	29	800	0.0144482	0.0162414	8287	171	0.0802133	0.0222882	385	0	1			0	72	376	0	2019-06-08
2018-05-19	6	132	m	N	0	-	6	5	2019-06-08	8400	245	0.378238	35	3200	0.0116027	0.0360969	8287	171	0.0802133	0.0222882	385	0	1			0	93	376	0	2019-06-08
2018-05-19	6	133	f	Y	Huu	Neck lateral	6	0	2018-05-28	115	71	0.376135					3385	114	0.063588	0.0178291	385	0	1					376	0	2019-06-08
2018-05-19	6	133	f	Y	Huu	Neck lateral	6	1	2018-07-31	384	100	0.384	29	269	0.0374599	0.131875	3385	114	0.063588	0.0178291	385	0	1			0	64	376	0	2019-06-08
2018-05-19	6	133	f	Y	Huu	Neck lateral	6	2	2018-09-30	1600	130	0.64547	30	1216	0.0301074	0.163768	3385	114	0.063588	0.0178291	385	0	1			0	61	376	0	2019-06-08
2018-05-19	6	133	f	Y	Huu	Neck lateral	6	3	2018-12-25	4200	178	0.57121	48	2600	0.0255784	0.0785531	3385	114	0.063588	0.0178291	385	0	1			0	86	376	0	2019-06-08
2018-05-19	6	133	f	Y	Huu	Neck lateral	6	4	2019-03-07	3500	180	0.457958	2	-700	0.0010863	-0.0177257	3385	114	0.063588	0.0178291	385	0	1			0	72	376	0	2019-06-08
2018-05-19	6	133	f	Y	Huu	Neck lateral	6	5	2019-06-08	3500	185	0.416537	5	0	0.0020623	0	3385	114	0.063588	0.0178291	385	0	1			0	93	376	0	2019-06-08
2018-05-19	6	134	m	N	0	-	6	0	2018-05-28	94	67	0.375759					3206	118	0.0662465	0.0189086	385	0	1					376	0	2019-06-08
2018-05-19	6	134	m	N	0	-	6	1	2018-07-31	373	90	0.537069	23	279	0.0322784	0.15075	3206	118	0.0662465	0.0189086	385	0	1			0	64	376	0	2019-06-08
2018-05-19	6	134	m	N	0	-	6	2	2018-09-30	1295	123	0.6327	33	922	0.0358463	0.142833	3206	118	0.0662465	0.0189086	385	0	1			0	61	376	0	2019-06-08
2018-05-19	6	134	m	N	0	-	6	3	2018-12-25	1800	149	0.452948	26	505	0.0156085	0.0268015	3206	118	0.0662465	0.0189086	385	0	1			0	86	376	0	2019-06-08
2018-05-19	6	134	m	N	0	-	6	4	2019-03-07	1600	150	0.393409	1	-200	0.0006503	-0.0114511	3206	118	0.0662465	0.0189086	385	0	1			0	72	376	0	2019-06-08
2018-05-19	6	134	m	N	0	-	6	5	2019-06-08	3300	185	0.392735	35	1700	0.0157854	0.0544885	3206	118	0.0662465	0.0189086	385	0	1			0	93	376	0	2019-06-08
2018-05-19	6	135	f	Y	Huu	Neck lateral	6	0	2018-05-28	89	66	0.374773					5511	144	0.0771096	0.0215483	384	0	1					376	0	2019-06-08
2018-05-19	6	135	f	Y	Huu	Neck lateral	6	1	2018-07-31	312	93	0.401055	27	223	0.0375096	0.137196	5511	144	0.0771096	0.0215483	384	0	1			0	64	376	0	2019-06-08
2018-05-19	6	135	f	Y	Huu	Neck lateral	6	2	2018-09-30	1298	125	0.599744	32	986	0.0339344	0.163591	5511	144	0.0771096	0.0215483	384	0	1			0	61	376	0	2019-06-08
2018-05-19	6	135	f	Y	Huu	Neck lateral	6	3	2018-12-25	4400	175	0.63466	50	3102	0.0273873	0.0993658	5511	144	0.0771096	0.0215483	384	0	1			0	86	376	0	2019-06-08
2018-05-19	6	135	f	Y	Huu	Neck lateral	6	4	2019-03-07	5000	200	0.454366	25	600	0.0129822	0.0124282	5511	144	0.0771096	0.0215483	384	0	1			0	72	376	0	2019-06-08
2018-05-19	6	135	f	Y	Huu	Neck lateral	6	5	2019-06-08	5600	210	0.429842	10	600	0.0036724	0.0085301	5511	144	0.0771096	0.0215483	384	0	1			0	93	376	0	2019-06-08
2018-05-19	6	136	m	N	0	-	6	0	2018-05-28	91	66	0.383195					5309	149	0.0760188	0.0219864	385	0	1					376	0	2019-06-08
2018-05-19	6	136	m	N	0	-	6	1	2018-07-31	413	87	0.668672	21	322	0.0302152	0.165439	5309	149	0.0760188	0.0219864	385	0	1			0	64	376	0	2019-06-08
2018-05-19	6	136	m	N	0	-	6	2	2018-09-30	1360	125	0.628391	38	947	0.0415875	0.136763	5309	149	0.0760188	0.0219864	385	0	1			0	61	376	0	2019-06-08
2018-05-19	6	136	m	N	0	-	6	3	2018-12-25	2200	148	0.566653	23	840	0.0137476	0.0391489	5309	149	0.0760188	0.0219864	385	0	1			0	86	376	0	2019-06-08
2018-05-19	6	136	m	N	0	-	6	4	2019-03-07	1800	165	0.318257	17	-400	0.0105713	-0.0195097	5309	149	0.0760188	0.0219864	385	0	1			0	72	376	0	2019-06-08
2018-05-19	6	136	m	N	0	-	6	5	2019-06-08	5400	215	0.382082	50	3600	0.0199231	0.0826912	5309	149	0.0760188	0.0219864	385	0	1			0	93	376	0	2019-06-08
2018-05-19	6	137	f	Y	Nhut	Neck upper	6	0	2018-05-28	78	64	0.365352									344	1	0	2019-04-28				376	1	2019-04-28
2018-05-19	6	137	f	Y	Nhut	Neck upper	6	1	2018-07-31	337	90	0.485233	26	259	0.0372888	0.160056					344	1	0	2019-04-28		0	64	376	1	2019-04-28
2018-05-19	6	137	f	Y	Nhut	Neck upper	6	2	2018-09-30	1257	123	0.614135	33	920	0.0358463	0.151062					344	1	0	2019-04-28		0	61	376	1	2019-04-28
2018-05-19	6	137	f	Y	Nhut	Neck upper	6	3	2018-12-25	2000	140	0.624348	17	743	0.0105373	0.0378016					344	1	0	2019-04-28		0	86	376	1	2019-04-28
2018-05-19	6	137	f	Y	Nhut	Neck upper	6	4	2019-03-07	2000	140	0.624348	0	0	0	0					344	1	0	2019-04-28		0	72	376	1	2019-04-28
2018-05-19	6	137	f	Y	Nhut	Neck upper	6	5	2019-06-08												344	1	0	2019-04-28	2019-04-28	1	93	376	1	2019-04-28
2018-05-19	6	138	f	N	0	-	6	0	2018-05-28	97	68	0.368376					15903	212	0.0950517	0.0263483	385	0	1					376	0	2019-06-08
2018-05-19	6	138	f	N	0	-	6	1	2018-07-31	318	90	0.457876	22	221	0.030658	0.129865	15903	212	0.0950517	0.0263483	385	0	1			0	64	376	0	2019-06-08
2018-05-19	6	138	f	N	0	-	6	2	2018-09-30	1657	130	0.668465	40	1339	0.0421979	0.189426	15903	212	0.0950517	0.0263483	385	0	1			0	61	376	0	2019-06-08
2018-05-19	6	138	f	N	0	-	6	3	2018-12-25	5600	194	0.56545	64	3943	0.0325845	0.0991198	15903	212	0.0950517	0.0263483	385	0	1			0	86	376	0	2019-06-08
2018-05-19	6	138	f	N	0	-	6	4	2019-03-07	9000	230	0.504271	36	3400	0.0165493	0.0461279	15903	212	0.0950517	0.0263483	385	0	1			0	72	376	0	2019-06-08
2018-05-19	6	138	f	N	0	-	6	5	2019-06-08	16000	280	0.453893	50	7000	0.0148062	0.043307	15903	212	0.0950517	0.0263483	385	0	1			0	93	376	0	2019-06-08
2018-05-19	6	139	m	Y	Nhut	Neck lateral	6	0	2018-05-28	92	62	0.480964									238	1	0	2019-01-12				376	1	2019-01-12
2018-05-19	6	139	m	Y	Nhut	Neck lateral	6	1	2018-07-31	341	93	0.438332	31	249	0.0443477	0.143291					238	1	0	2019-01-12		0	64	376	1	2019-01-12
2018-05-19	6	139	m	Y	Nhut	Neck lateral	6	2	2018-09-30	1362	122	0.684498	29	1021	0.0311467	0.158915					238	1	0	2019-01-12		0	61	376	1	2019-01-12
2018-05-19	6	139	m	Y	Nhut	Neck lateral	6	3	2018-12-25	3000	165	0.530428	43	1638	0.0245752	0.0642745					238	1	0	2019-01-12		0	86	376	1	2019-01-12
2018-05-19	6	139	m	Y	Nhut	Neck lateral	6	4	2019-03-07												238	1	0	2019-01-12	2019-01-12	1	72	376	1	2019-01-12
2018-05-19	6	139	m	Y	Nhut	Neck lateral	6	5	2019-06-08												238	1	0	2019-01-12		0	93	376	1	2019-01-12
2018-05-19	6	140	f	N	0	-	6	0	2018-05-28	92	65	0.408421									310	1	0	2019-03-25				376	1	2019-03-25
2018-05-19	6	140	f	N	0	-	6	1	2018-07-31	425	86	0.716183	21	333	0.0306206	0.167377					310	1	0	2019-03-25		0	64	376	1	2019-03-25
2018-05-19	6	140	f	N	0	-	6	2	2018-09-30	1284	128	0.546536	42	859	0.0456357	0.126877					310	1	0	2019-03-25		0	61	376	1	2019-03-25
2018-05-19	6	140	f	N	0	-	6	3	2018-12-25	1700	145	0.470019	17	416	0.0101503	0.0228434					310	1	0	2019-03-25		0	86	376	1	2019-03-25
2018-05-19	6	140	f	N	0	-	6	4	2019-03-07	1800	150	0.442585	5	100	0.003296	0.0055571					310	1	0	2019-03-25		0	72	376	1	2019-03-25
2018-05-19	6	140	f	N	0	-	6	5	2019-06-08												310	1	0	2019-03-25	2019-03-25	1	93	376	1	2019-03-25
2018-05-19	6	141	m	Y	Nhut	Neck lateral	6	0	2018-05-28	97	66	0.40846					3903	134	0.069243	0.02064	385	0	1					376	0	2019-06-08
2018-05-19	6	141	m	Y	Nhut	Neck lateral	6	1	2018-07-31	379	90	0.545708	24	282	0.0339232	0.149059	3903	134	0.069243	0.02064	385	0	1			0	64	376	0	2019-06-08
2018-05-19	6	141	m	Y	Nhut	Neck lateral	6	2	2018-09-30	1386	120	0.737558	30	1007	0.0330127	0.148795	3903	134	0.069243	0.02064	385	0	1			0	61	376	0	2019-06-08
2018-05-19	6	141	m	Y	Nhut	Neck lateral	6	3	2018-12-25	2400	155	0.526822	35	1014	0.0208318	0.0446899	3903	134	0.069243	0.02064	385	0	1			0	86	376	0	2019-06-08
2018-05-19	6	141	m	Y	Nhut	Neck lateral	6	4	2019-03-07	2600	165	0.459705	10	200	0.0060784	0.0077819	3903	134	0.069243	0.02064	385	0	1			0	72	376	0	2019-06-08
2018-05-19	6	141	m	Y	Nhut	Neck lateral	6	5	2019-06-08	4000	200	0.363493	35	1400	0.0144796	0.0324245	3903	134	0.069243	0.02064	385	0	1			0	93	376	0	2019-06-08
2018-05-19	6	142	m	N	0	-	6	0	2018-05-28	85	65	0.377345					6915	160	0.0821199	0.023117	385	0	1					376	0	2019-06-08
2018-05-19	6	142	m	N	0	-	6	1	2018-07-31	369	86	0.621816	21	284	0.0306206	0.160578	6915	160	0.0821199	0.023117	385	0	1			0	64	376	0	2019-06-08
2018-05-19	6	142	m	N	0	-	6	2	2018-09-30	1419	128	0.603998	42	1050	0.0456357	0.154564	6915	160	0.0821199	0.023117	385	0	1			0	61	376	0	2019-06-08
2018-05-19	6	142	m	N	0	-	6	3	2018-12-25	2800	166	0.484824	38	1381	0.0211593	0.0553217	6915	160	0.0821199	0.023117	385	0	1			0	86	376	0	2019-06-08
2018-05-19	6	142	m	N	0	-	6	4	2019-03-07	4500	190	0.488343	24	1700	0.0131285	0.0461279	6915	160	0.0821199	0.023117	385	0	1			0	72	376	0	2019-06-08
2018-05-19	6	142	m	N	0	-	6	5	2019-06-08	7000	225	0.423201	35	2500	0.0127262	0.0332562	6915	160	0.0821199	0.023117	385	0	1			0	93	376	0	2019-06-08
2018-05-19	6	143	m	Y	Nhut	Neck upper	6	0	2018-05-28	90	68	0.341792									152	1	0	2018-10-18				376	1	2018-10-18
2018-05-19	6	143	m	Y	Nhut	Neck upper	6	1	2018-07-31	461	97	0.512237	29	371	0.0388504	0.178674					152	1	0	2018-10-18		0	64	376	1	2018-10-18
2018-05-19	6	143	m	Y	Nhut	Neck upper	6	2	2018-09-30	1533	133	0.571499	36	1072	0.0362208	0.137887					152	1	0	2018-10-18		0	61	376	1	2018-10-18
2018-05-19	6	143	m	Y	Nhut	Neck upper	6	3	2018-12-25												152	1	0	2018-10-18	2018-10-18	1	86	376	1	2018-10-18
2018-05-19	6	143	m	Y	Nhut	Neck upper	6	4	2019-03-07												152	1	0	2018-10-18		0	72	376	1	2018-10-18
2018-05-19	6	143	m	Y	Nhut	Neck upper	6	5	2019-06-08												152	1	0	2018-10-18		0	93	376	1	2018-10-18
2018-05-19	6	144	m	N	0	-	6	0	2018-05-28	89	66	0.374773									238	1	0	2019-01-12				376	1	2019-01-12
2018-05-19	6	144	m	N	0	-	6	1	2018-07-31	130	72	0.40511	6	41	0.0095169	0.041442					238	1	0	2019-01-12		0	64	376	1	2019-01-12
2018-05-19	6	144	m	N	0	-	6	2	2018-09-30	1212	126	0.544779	54	1082	0.0642182	0.256188					238	1	0	2019-01-12		0	61	376	1	2019-01-12
2018-05-19	6	144	m	N	0	-	6	3	2018-12-25	3100	166	0.536769	40	1888	0.0224412	0.0764408					238	1	0	2019-01-12		0	86	376	1	2019-01-12
2018-05-19	6	144	m	N	0	-	6	4	2019-03-07												238	1	0	2019-01-12	2019-01-12	1	72	376	1	2019-01-12
2018-05-19	6	144	m	N	0	-	6	5	2019-06-08												238	1	0	2019-01-12		0	93	376	1	2019-01-12
2018-05-19	6	145	f	Y	Nhut	Neck lateral	6	0	2018-05-28	115	70	0.395056					7885	170	0.0789783	0.0229388	384	0	1					376	0	2019-06-08
2018-05-19	6	145	f	Y	Nhut	Neck lateral	6	1	2018-07-31	431	95	0.514699	25	316	0.0334011	0.144504	7885	170	0.0789783	0.0229388	384	0	1			0	64	376	0	2019-06-08
2018-05-19	6	145	f	Y	Nhut	Neck lateral	6	2	2018-09-30	1738	140	0.542559	45	1307	0.0444977	0.160011	7885	170	0.0789783	0.0229388	384	0	1			0	61	376	0	2019-06-08
2018-05-19	6	145	f	Y	Nhut	Neck lateral	6	3	2018-12-25	4400	175	0.63466	35	2662	0.0181628	0.0756057	7885	170	0.0789783	0.0229388	384	0	1			0	86	376	0	2019-06-08
2018-05-19	6	145	f	Y	Nhut	Neck lateral	6	4	2019-03-07	5800	210	0.445194	35	1400	0.0177257	0.026858	7885	170	0.0789783	0.0229388	384	0	1			0	72	376	0	2019-06-08
2018-05-19	6	145	f	Y	Nhut	Neck lateral	6	5	2019-06-08	8000	240	0.386865	30	2200	0.0100508	0.0242052	7885	170	0.0789783	0.0229388	384	0	1			0	93	376	0	2019-06-08
2018-05-19	6	146	m	N	0	-	6	0	2018-05-28	99	66	0.416882					6101	149	0.0770221	0.0219864	385	0	1					376	0	2019-06-08
2018-05-19	6	146	m	N	0	-	6	1	2018-07-31	346	84	0.632513	18	247	0.0263771	0.136863	6101	149	0.0770221	0.0219864	385	0	1			0	64	376	0	2019-06-08
2018-05-19	6	146	m	N	0	-	6	2	2018-09-30	1580	125	0.730043	41	1234	0.0456144	0.174282	6101	149	0.0770221	0.0219864	385	0	1			0	61	376	0	2019-06-08
2018-05-19	6	146	m	N	0	-	6	3	2018-12-25	2700	160	0.531017	35	1120	0.0200933	0.0436138	6101	149	0.0770221	0.0219864	385	0	1			0	86	376	0	2019-06-08
2018-05-19	6	146	m	N	0	-	6	4	2019-03-07	3000	170	0.478374	10	300	0.0058941	0.0102434	6101	149	0.0770221	0.0219864	385	0	1			0	72	376	0	2019-06-08
2018-05-19	6	146	m	N	0	-	6	5	2019-06-08	6200	215	0.438687	45	3200	0.0176761	0.0546404	6101	149	0.0770221	0.0219864	385	0	1			0	93	376	0	2019-06-08
2018-05-19	6	147	f	Y	Nhut	Neck lateral	6	0	2018-05-28	97	70	0.333221					7903	170	0.0821473	0.0229388	385	0	1					376	0	2019-06-08
2018-05-19	6	147	f	Y	Nhut	Neck lateral	6	1	2018-07-31	447	96	0.514813	26	350	0.0345464	0.167108	7903	170	0.0821473	0.0229388	385	0	1			0	64	376	0	2019-06-08
2018-05-19	6	147	f	Y	Nhut	Neck lateral	6	2	2018-09-30	1425	130	0.574872	34	978	0.0347919	0.133042	7903	170	0.0821473	0.0229388	385	0	1			0	61	376	0	2019-06-08
2018-05-19	6	147	f	Y	Nhut	Neck lateral	6	3	2018-12-25	3200	165	0.56579	35	1775	0.0194055	0.0658471	7903	170	0.0821473	0.0229388	385	0	1			0	86	376	0	2019-06-08
2018-05-19	6	147	f	Y	Nhut	Neck lateral	6	4	2019-03-07	4800	195	0.476125	30	1600	0.0162414	0.0394202	7903	170	0.0821473	0.0229388	385	0	1			0	72	376	0	2019-06-08
2018-05-19	6	147	f	Y	Nhut	Neck lateral	6	5	2019-06-08	8000	240	0.386865	45	3200	0.0156288	0.0384492	7903	170	0.0821473	0.0229388	385	0	1			0	93	376	0	2019-06-08
2018-05-19	6	148	m	N	0	-	6	0	2018-05-28	100	62	0.522787					2400	118	0.0599259	0.0198424	385	0	1					376	0	2019-06-08
2018-05-19	6	148	m	N	0	-	6	1	2018-07-31	387	85	0.679081	23	287	0.0345097	0.148012	2400	118	0.0599259	0.0198424	385	0	1			0	64	376	0	2019-06-08
2018-05-19	6	148	m	N	0	-	6	2	2018-09-30	1265	118	0.713475	33	878	0.0376432	0.135915	2400	118	0.0599259	0.0198424	385	0	1			0	61	376	0	2019-06-08
2018-05-19	6	148	m	N	0	-	6	3	2018-12-25	1800	140	0.561913	22	535	0.0139152	0.0287093	2400	118	0.0599259	0.0198424	385	0	1			0	86	376	0	2019-06-08
2018-05-19	6	148	m	N	0	-	6	4	2019-03-07	2100	160	0.413013	20	300	0.0129822	0.0149869	2400	118	0.0599259	0.0198424	385	0	1			0	72	376	0	2019-06-08
2018-05-19	6	148	m	N	0	-	6	5	2019-06-08	2500	180	0.327112	20	400	0.0088654	0.0131234	2400	118	0.0599259	0.0198424	385	0	1			0	93	376	0	2019-06-08
2018-05-19	6	149	m	Y	Nhut	Neck lateral	6	0	2018-05-28	94	62	0.49142					2906	128	0.0644721	0.020849	385	0	1					376	0	2019-06-08
2018-05-19	6	149	m	Y	Nhut	Neck lateral	6	1	2018-07-31	354	87	0.573148	25	260	0.0370534	0.145032	2906	128	0.0644721	0.020849	385	0	1			0	64	376	0	2019-06-08
2018-05-19	6	149	m	Y	Nhut	Neck lateral	6	2	2018-09-30	1426	126	0.64097	39	1072	0.0425019	0.15989	2906	128	0.0644721	0.020849	385	0	1			0	61	376	0	2019-06-08
2018-05-19	6	149	m	Y	Nhut	Neck lateral	6	3	2018-12-25	4000	176	0.5657	50	2574	0.0272025	0.0839529	2906	128	0.0644721	0.020849	385	0	1			0	86	376	0	2019-06-08
2018-05-19	6	149	m	Y	Nhut	Neck lateral	6	4	2019-03-07	3500	180	0.457958	4	-500	0.0021849	-0.0129822	2906	128	0.0644721	0.020849	385	0	1			0	72	376	0	2019-06-08
2018-05-19	6	149	m	Y	Nhut	Neck lateral	6	5	2019-06-08	3000	190	0.325562	10	-500	0.0040696	-0.0116027	2906	128	0.0644721	0.020849	385	0	1			0	93	376	0	2019-06-08
2018-05-19	6	150	m	N	0	-	6	0	2018-05-28	83	60	0.486043					9317	185	0.0880515	0.0261925	385	0	1					376	0	2019-06-08
2018-05-19	6	150	m	N	0	-	6	1	2018-07-31	291	80	0.629799	20	208	0.0314652	0.137209	9317	185	0.0880515	0.0261925	385	0	1			0	64	376	0	2019-06-08
2018-05-19	6	150	m	N	0	-	6	2	2018-09-30	1383	125	0.639019	45	1092	0.0512133	0.178866	9317	185	0.0880515	0.0261925	385	0	1			0	61	376	0	2019-06-08
2018-05-19	6	150	m	N	0	-	6	3	2018-12-25	3800	175	0.548115	50	2417	0.0273873	0.08227	9317	185	0.0880515	0.0261925	385	0	1			0	86	376	0	2019-06-08
2018-05-19	6	150	m	N	0	-	6	4	2019-03-07	5800	200	0.527065	25	2000	0.0129822	0.0411111	9317	185	0.0880515	0.0261925	385	0	1			0	72	376	0	2019-06-08
2018-05-19	6	150	m	N	0	-	6	5	2019-06-08	9400	245	0.423266	45	3600	0.0152751	0.0363437	9317	185	0.0880515	0.0261925	385	0	1			0	93	376	0	2019-06-08
2018-05-19	6	151	m	Y	Nhut	Neck lateral	7	0	2018-05-28	84	60	0.491899					8716	180	0.0866006	0.0258087	385	0	1					376	0	2019-06-08
2018-05-19	6	151	m	Y	Nhut	Neck lateral	7	1	2018-07-31	327	83	0.623071	23	243	0.0354918	0.148656	8716	180	0.0866006	0.0258087	385	0	1			0	64	376	0	2019-06-08
2018-05-19	6	151	m	Y	Nhut	Neck lateral	7	2	2018-09-30	1270	120	0.675829	37	943	0.0423042	0.1557	8716	180	0.0866006	0.0258087	385	0	1			0	61	376	0	2019-06-08
2018-05-19	6	151	m	Y	Nhut	Neck lateral	7	3	2018-12-25	3300	173	0.495307	53	2030	0.0297744	0.0777249	8716	180	0.0866006	0.0258087	385	0	1			0	86	376	0	2019-06-08
2018-05-19	6	151	m	Y	Nhut	Neck lateral	7	4	2019-03-07	4800	190	0.520899	17	1500	0.0091129	0.0364285	8716	180	0.0866006	0.0258087	385	0	1			0	72	376	0	2019-06-08
2018-05-19	6	151	m	Y	Nhut	Neck lateral	7	5	2019-06-08	8800	240	0.425551	50	4000	0.0175839	0.0456231	8716	180	0.0866006	0.0258087	385	0	1			0	93	376	0	2019-06-08
2018-05-19	6	152	f	N	0	-	7	0	2018-05-28	97	68	0.368376									263	1	0	2019-02-06				376	1	2019-02-06
2018-05-19	6	152	f	N	0	-	7	1	2018-07-31	199	80	0.430687	12	102	0.0177755	0.0785962					263	1	0	2019-02-06		0	64	376	1	2019-02-06
2018-05-19	6	152	f	N	0	-	7	2	2018-09-30	992	118	0.5595	38	793	0.0446001	0.184343					263	1	0	2019-02-06		0	61	376	1	2019-02-06
2018-05-19	6	152	f	N	0	-	7	3	2018-12-25	1900	152	0.446246	34	908	0.020609	0.0528977					263	1	0	2019-02-06		0	86	376	1	2019-02-06
2018-05-19	6	152	f	N	0	-	7	4	2019-03-07												263	1	0	2019-02-06	2019-02-06	1	72	376	1	2019-02-06
2018-05-19	6	152	f	N	0	-	7	5	2019-06-08												263	1	0	2019-02-06		0	93	376	1	2019-02-06
2018-05-19	6	153	m	Y	Nhut	Neck upper	7	0	2018-05-28	105	70	0.360703					5895	150	0.0753162	0.021319	385	0	1					376	0	2019-06-08
2018-05-19	6	153	m	Y	Nhut	Neck upper	7	1	2018-07-31	277	84	0.506376	14	172	0.0199414	0.1061	5895	150	0.0753162	0.021319	385	0	1			0	64	376	0	2019-06-08
2018-05-19	6	153	m	Y	Nhut	Neck upper	7	2	2018-09-30	1128	114	0.716834	30	851	0.0350438	0.161136	5895	150	0.0753162	0.021319	385	0	1			0	61	376	0	2019-06-08
2018-05-19	6	153	m	Y	Nhut	Neck upper	7	3	2018-12-25	2200	152	0.516706	38	1072	0.023416	0.054373	5895	150	0.0753162	0.021319	385	0	1			0	86	376	0	2019-06-08
2018-05-19	6	153	m	Y	Nhut	Neck upper	7	4	2019-03-07	3200	180	0.418704	28	1000	0.016438	0.0364285	5895	150	0.0753162	0.021319	385	0	1			0	72	376	0	2019-06-08
2018-05-19	6	153	m	Y	Nhut	Neck upper	7	5	2019-06-08	6000	220	0.392075	40	2800	0.0151042	0.0473146	5895	150	0.0753162	0.021319	385	0	1			0	93	376	0	2019-06-08
2018-05-19	6	154	f	N	0	-	7	0	2018-05-28	78	65	0.34627					2922	95	0.0679458	0.01677	385	0	1					376	0	2019-06-08
2018-05-19	6	154	f	N	0	-	7	1	2018-07-31	291	80	0.629799	15	213	0.0227106	0.144005	2922	95	0.0679458	0.01677	385	0	1			0	64	376	0	2019-06-08
2018-05-19	6	154	f	N	0	-	7	2	2018-09-30	780	98	0.836474	18	489	0.0232883	0.113144	2922	95	0.0679458	0.01677	385	0	1			0	61	376	0	2019-06-08
2018-05-19	6	154	f	N	0	-	7	3	2018-12-25	1700	145	0.470019	47	920	0.031888	0.0634143	2922	95	0.0679458	0.01677	385	0	1			0	86	376	0	2019-06-08
2018-05-19	6	154	f	N	0	-	7	4	2019-03-07	1600	145	0.442371	0	-100	0	-0.0058941	2922	95	0.0679458	0.01677	385	0	1			0	72	376	0	2019-06-08
2018-05-19	6	154	f	N	0	-	7	5	2019-06-08	3000	160	0.590019	15	1400	0.0074095	0.0473146	2922	95	0.0679458	0.01677	385	0	1			0	93	376	0	2019-06-08
2018-05-19	6	155	f	Y	Nhut	Neck lateral	7	0	2018-05-28	90	66	0.378984					4910	124	0.0747917	0.0196851	385	0	1					376	0	2019-06-08
2018-05-19	6	155	f	Y	Nhut	Neck lateral	7	1	2018-07-31	348	88	0.541588	22	258	0.0314652	0.147918	4910	124	0.0747917	0.0196851	385	0	1			0	64	376	0	2019-06-08
2018-05-19	6	155	f	Y	Nhut	Neck lateral	7	2	2018-09-30	1233	120	0.656139	32	885	0.0355916	0.145164	4910	124	0.0747917	0.0196851	385	0	1			0	61	376	0	2019-06-08
2018-05-19	6	155	f	Y	Nhut	Neck lateral	7	3	2018-12-25	1500	142	0.445834	22	267	0.0137017	0.0159547	4910	124	0.0747917	0.0196851	385	0	1			0	86	376	0	2019-06-08
2018-05-19	6	155	f	Y	Nhut	Neck lateral	7	4	2019-03-07	1800	150	0.442585	8	300	0.0053286	0.0177257	4910	124	0.0747917	0.0196851	385	0	1			0	72	376	0	2019-06-08
2018-05-19	6	155	f	Y	Nhut	Neck lateral	7	5	2019-06-08	5000	190	0.542603	40	3200	0.0177927	0.0768985	4910	124	0.0747917	0.0196851	385	0	1			0	93	376	0	2019-06-08
2018-05-19	6	156	f	N	0	-	7	0	2018-05-28	92	68	0.349387					9508	167	0.0865269	0.0230866	385	0	1					376	0	2019-06-08
2018-05-19	6	156	f	N	0	-	7	1	2018-07-31	291	87	0.471147	19	199	0.02695	0.125949	9508	167	0.0865269	0.0230866	385	0	1			0	64	376	0	2019-06-08
2018-05-19	6	156	f	N	0	-	7	2	2018-09-30	982	125	0.453736	38	691	0.0415875	0.139572	9508	167	0.0865269	0.0230866	385	0	1			0	61	376	0	2019-06-08
2018-05-19	6	156	f	N	0	-	7	3	2018-12-25	2200	145	0.60826	20	1218	0.0120807	0.0656552	9508	167	0.0865269	0.0230866	385	0	1			0	86	376	0	2019-06-08
2018-05-19	6	156	f	N	0	-	7	4	2019-03-07	4000	185	0.476043	40	1800	0.0236855	0.058123	9508	167	0.0865269	0.0230866	385	0	1			0	72	376	0	2019-06-08
2018-05-19	6	156	f	N	0	-	7	5	2019-06-08	9600	235	0.499317	50	5600	0.0180065	0.0658955	9508	167	0.0865269	0.0230866	385	0	1			0	93	376	0	2019-06-08
2018-05-19	6	157	m	Y	Nhut	Neck upper	7	0	2018-05-28	97	65	0.430617					10903	190	0.088076	0.0254472	385	0	1					376	0	2019-06-08
2018-05-19	6	157	m	Y	Nhut	Neck upper	7	1	2018-07-31	495	93	0.636289	28	398	0.0391795	0.178264	10903	190	0.088076	0.0254472	385	0	1			0	64	376	0	2019-06-08
2018-05-19	6	157	m	Y	Nhut	Neck upper	7	2	2018-09-30	1570	130	0.633367	37	1075	0.0384352	0.132458	10903	190	0.088076	0.0254472	385	0	1			0	61	376	0	2019-06-08
2018-05-19	6	157	m	Y	Nhut	Neck upper	7	3	2018-12-25	4400	185	0.523647	55	2830	0.028718	0.0838803	10903	190	0.088076	0.0254472	385	0	1			0	86	376	0	2019-06-08
2018-05-19	6	157	m	Y	Nhut	Neck upper	7	4	2019-03-07	8200	220	0.535835	35	3800	0.0168459	0.0605237	10903	190	0.088076	0.0254472	385	0	1			0	72	376	0	2019-06-08
2018-05-19	6	157	m	Y	Nhut	Neck upper	7	5	2019-06-08	11000	255	0.431284	35	2800	0.0111124	0.0221111	10903	190	0.088076	0.0254472	385	0	1			0	93	376	0	2019-06-08
2018-05-19	6	158	f	N	0	-	7	0	2018-05-28	78	63	0.385813									335	1	0	2019-04-19				376	1	2019-04-19
2018-05-19	6	158	f	N	0	-	7	1	2018-07-31	303	86	0.510597	23	225	0.0340389	0.148424					335	1	0	2019-04-19		0	64	376	1	2019-04-19
2018-05-19	6	158	f	N	0	-	7	2	2018-09-30	1000	113	0.655162	27	697	0.0313325	0.137019					335	1	0	2019-04-19		0	61	376	1	2019-04-19
2018-05-19	6	158	f	N	0	-	7	3	2018-12-25	2600	160	0.51135	47	1600	0.0283082	0.0777742					335	1	0	2019-04-19		0	86	376	1	2019-04-19
2018-05-19	6	158	f	N	0	-	7	4	2019-03-07	2000	165	0.353619	5	-600	0.0029917	-0.0255076					335	1	0	2019-04-19		0	72	376	1	2019-04-19
2018-05-19	6	158	f	N	0	-	7	5	2019-06-08												335	1	0	2019-04-19	2019-04-19	1	93	376	1	2019-04-19
2018-05-19	6	159	f	Y	Nhut	Neck upper	7	0	2018-05-28	93	65	0.41286					4907	145	0.0741813	0.0218326	384	0	1					376	0	2019-06-08
2018-05-19	6	159	f	Y	Nhut	Neck upper	7	1	2018-07-31	312	82	0.619953	17	219	0.0254113	0.132388	4907	145	0.0741813	0.0218326	384	0	1			0	64	376	0	2019-06-08
2018-05-19	6	159	f	Y	Nhut	Neck upper	7	2	2018-09-30	1612	128	0.686149	46	1300	0.0511013	0.188452	4907	145	0.0741813	0.0218326	384	0	1			0	61	376	0	2019-06-08
2018-05-19	6	159	f	Y	Nhut	Neck upper	7	3	2018-12-25	3900	174	0.573805	46	2288	0.0249904	0.0719129	4907	145	0.0741813	0.0218326	384	0	1			0	86	376	0	2019-06-08
2018-05-19	6	159	f	Y	Nhut	Neck upper	7	4	2019-03-07	5400	200	0.490716	26	1500	0.0135394	0.0316383	4907	145	0.0741813	0.0218326	384	0	1			0	72	376	0	2019-06-08
2018-05-19	6	159	f	Y	Nhut	Neck upper	7	5	2019-06-08	5000	210	0.383788	10	-400	0.0036724	-0.0057928	4907	145	0.0741813	0.0218326	384	0	1			0	93	376	0	2019-06-08
2018-05-19	7	160	m	N	0	-	7	0	2018-05-28	89	65	0.395103					6211	165	0.0793023	0.0235262	385	0	1					376	0	2019-06-08
2018-05-19	7	160	m	N	0	-	7	1	2018-07-31	329	87	0.532671	22	240	0.0318851	0.142999	6211	165	0.0793023	0.0235262	385	0	1			0	64	376	0	2019-06-08
2018-05-19	7	160	m	N	0	-	7	2	2018-09-30	1440	130	0.580923	43	1111	0.0460883	0.169416	6211	165	0.0793023	0.0235262	385	0	1			0	61	376	0	2019-06-08
2018-05-19	7	160	m	N	0	-	7	3	2018-12-25	3000	168	0.498369	38	1560	0.0208722	0.0597417	6211	165	0.0793023	0.0235262	385	0	1			0	86	376	0	2019-06-08
2018-05-19	7	160	m	N	0	-	7	4	2019-03-07	5000	200	0.454366	32	2000	0.016951	0.0496636	6211	165	0.0793023	0.0235262	385	0	1			0	72	376	0	2019-06-08
2018-05-19	7	160	m	N	0	-	7	5	2019-06-08	6300	230	0.35299	30	1300	0.0105197	0.0173955	6211	165	0.0793023	0.0235262	385	0	1			0	93	376	0	2019-06-08
2018-05-19	7	161	m	Y	Nhut	Neck lateral	7	0	2018-05-28	98	65	0.435057					10902	190	0.0878851	0.0254472	385	0	1					376	0	2019-06-08
2018-05-19	7	161	m	Y	Nhut	Neck lateral	7	1	2018-07-31	436	90	0.62778	25	338	0.0355931	0.163261	10902	190	0.0878851	0.0254472	385	0	1			0	64	376	0	2019-06-08
2018-05-19	7	161	m	Y	Nhut	Neck lateral	7	2	2018-09-30	1722	137	0.579402	47	1286	0.0482164	0.157626	10902	190	0.0878851	0.0254472	385	0	1			0	61	376	0	2019-06-08
2018-05-19	7	161	m	Y	Nhut	Neck lateral	7	3	2018-12-25	4600	180	0.601887	43	2878	0.022219	0.0799766	10902	190	0.0878851	0.0254472	385	0	1			0	86	376	0	2019-06-08
2018-05-19	7	161	m	Y	Nhut	Neck lateral	7	4	2019-03-07	7400	220	0.483559	40	2800	0.0195097	0.0462217	10902	190	0.0878851	0.0254472	385	0	1			0	72	376	0	2019-06-08
2018-05-19	7	161	m	Y	Nhut	Neck lateral	7	5	2019-06-08	11000	255	0.431284	35	3600	0.0111124	0.0298377	10902	190	0.0878851	0.0254472	385	0	1			0	93	376	0	2019-06-08
2018-05-19	7	162	f	N	0	-	7	0	2018-05-28	100	64	0.4684					11600	186	0.0886575	0.0253671	386	0	1					376	0	2019-06-08
2018-05-19	7	162	f	N	0	-	7	1	2018-07-31	442	90	0.636419	26	342	0.0372888	0.162547	11600	186	0.0886575	0.0253671	386	0	1			0	64	376	0	2019-06-08
2018-05-19	7	162	f	N	0	-	7	2	2018-09-30	1600	133	0.596476	43	1158	0.044816	0.147625	11600	186	0.0886575	0.0253671	386	0	1			0	61	376	0	2019-06-08
2018-05-19	7	162	f	N	0	-	7	3	2018-12-25	5500	186	0.642463	53	3900	0.0272998	0.100502	11600	186	0.0886575	0.0253671	386	0	1			0	86	376	0	2019-06-08
2018-05-19	7	162	f	N	0	-	7	4	2019-03-07	8400	225	0.507841	39	2900	0.0185066	0.041172	11600	186	0.0886575	0.0253671	386	0	1			0	72	376	0	2019-06-08
2018-05-19	7	162	f	N	0	-	7	5	2019-06-08	11700	250	0.491262	25	3300	0.0079304	0.0249409	11600	186	0.0886575	0.0253671	386	0	1			0	93	376	0	2019-06-08
2018-05-19	7	163	m	Y	Nhut	Neck lateral	7	0	2018-05-28	131	75	0.354453					8369	185	0.0776818	0.0231446	386	0	1					376	0	2019-06-08
2018-05-19	7	163	m	Y	Nhut	Neck lateral	7	1	2018-07-31	526	100	0.526	25	395	0.0314652	0.152043	8369	185	0.0776818	0.0231446	386	0	1			0	64	376	0	2019-06-08
2018-05-19	7	163	m	Y	Nhut	Neck lateral	7	2	2018-09-30	1652	136	0.570119	36	1126	0.0352851	0.131329	8369	185	0.0776818	0.0231446	386	0	1			0	61	376	0	2019-06-08
2018-05-19	7	163	m	Y	Nhut	Neck lateral	7	3	2018-12-25	5000	190	0.542603	54	3348	0.0272161	0.0901414	8369	185	0.0776818	0.0231446	386	0	1			0	86	376	0	2019-06-08
2018-05-19	7	163	m	Y	Nhut	Neck lateral	7	4	2019-03-07	7000	220	0.45742	30	2000	0.0142531	0.0327126	8369	185	0.0776818	0.0231446	386	0	1			0	72	376	0	2019-06-08
2018-05-19	7	163	m	Y	Nhut	Neck lateral	7	5	2019-06-08	8500	260	0.31161	40	1500	0.012574	0.0146139	8369	185	0.0776818	0.0231446	386	0	1			0	93	376	0	2019-06-08
2018-05-19	7	164	m	N	0	-	7	0	2018-05-28	97	65	0.430617					3903	130	0.069243	0.0204529	385	0	1					376	0	2019-06-08
2018-05-19	7	164	m	N	0	-	7	1	2018-07-31	375	86	0.631927	21	278	0.0306206	0.147898	3903	130	0.069243	0.0204529	385	0	1			0	64	376	0	2019-06-08
2018-05-19	7	164	m	N	0	-	7	2	2018-09-30	1524	135	0.539548	49	1149	0.0517458	0.160905	3903	130	0.069243	0.0204529	385	0	1			0	61	376	0	2019-06-08
2018-05-19	7	164	m	N	0	-	7	3	2018-12-25	3900	177	0.54085	42	2376	0.022048	0.0764822	3903	130	0.069243	0.0204529	385	0	1			0	86	376	0	2019-06-08
2018-05-19	7	164	m	N	0	-	7	4	2019-03-07	4000	190	0.434083	13	100	0.0068906	0.0024615	3903	130	0.069243	0.0204529	385	0	1			0	72	376	0	2019-06-08
2018-05-19	7	164	m	N	0	-	7	5	2019-06-08	4000	195	0.396771	5	0	0.0019551	0	3903	130	0.069243	0.0204529	385	0	1			0	93	376	0	2019-06-08
2018-05-19	7	165	m	Y	Nhut	Neck lateral	7	0	2018-05-28	123	67	0.491684					7077	178	0.0757648	0.0241382	385	0	1					376	0	2019-06-08
2018-05-19	7	165	m	Y	Nhut	Neck lateral	7	1	2018-07-31	415	90	0.597543	23	292	0.0322784	0.13301	7077	178	0.0757648	0.0241382	385	0	1			0	64	376	0	2019-06-08
2018-05-19	7	165	m	Y	Nhut	Neck lateral	7	2	2018-09-30	1548	131	0.608152	41	1133	0.0430773	0.151067	7077	178	0.0757648	0.0241382	385	0	1			0	61	376	0	2019-06-08
2018-05-19	7	165	m	Y	Nhut	Neck lateral	7	3	2018-12-25	3200	174	0.470814	43	1652	0.0231047	0.0591082	7077	178	0.0757648	0.0241382	385	0	1			0	86	376	0	2019-06-08
2018-05-19	7	165	m	Y	Nhut	Neck lateral	7	4	2019-03-07	3400	190	0.36897	16	200	0.0085525	0.0058941	7077	178	0.0757648	0.0241382	385	0	1			0	72	376	0	2019-06-08
2018-05-19	7	165	m	Y	Nhut	Neck lateral	7	5	2019-06-08	7200	245	0.324204	55	3800	0.0191359	0.0564746	7077	178	0.0757648	0.0241382	385	0	1			0	93	376	0	2019-06-08
2018-05-19	7	166	f	N	0	-	7	0	2018-05-28	92	67	0.367764					8208	153	0.083818	0.0221344	385	0	1					376	0	2019-06-08
2018-05-19	7	166	f	N	0	-	7	1	2018-07-31	265	80	0.573528	13	173	0.0193959	0.115712	8208	153	0.083818	0.0221344	385	0	1			0	64	376	0	2019-06-08
2018-05-19	7	166	f	N	0	-	7	2	2018-09-30	1235	120	0.657204	40	970	0.0465288	0.176618	8208	153	0.083818	0.0221344	385	0	1			0	61	376	0	2019-06-08
2018-05-19	7	166	f	N	0	-	7	3	2018-12-25	3400	160	0.668688	40	2165	0.023416	0.0824294	8208	153	0.083818	0.0221344	385	0	1			0	86	376	0	2019-06-08
2018-05-19	7	166	f	N	0	-	7	4	2019-03-07	4200	180	0.549549	20	800	0.0114511	0.0205439	8208	153	0.083818	0.0221344	385	0	1			0	72	376	0	2019-06-08
2018-05-19	7	166	f	N	0	-	7	5	2019-06-08	8300	220	0.54237	40	4100	0.0151042	0.0512709	8208	153	0.083818	0.0221344	385	0	1			0	93	376	0	2019-06-08
2018-05-19	7	167	f	Y	Nhut	Neck lateral	7	0	2018-05-28	136	66	0.572686									380	1	0	2019-06-03				376	1	2019-06-03
2018-05-19	7	167	f	Y	Nhut	Neck lateral	7	1	2018-07-31	491	92	0.655203	26	355	0.0363271	0.140414					380	1	0	2019-06-03		0	64	376	1	2019-06-03
2018-05-19	7	167	f	Y	Nhut	Neck lateral	7	2	2018-09-30	1611	134	0.585212	42	1120	0.0431534	0.136347					380	1	0	2019-06-03		0	61	376	1	2019-06-03
2018-05-19	7	167	f	Y	Nhut	Neck lateral	7	3	2018-12-25	3500	170	0.558104	36	1889	0.0193687	0.0631553					380	1	0	2019-06-03		0	86	376	1	2019-06-03
2018-05-19	7	167	f	Y	Nhut	Neck lateral	7	4	2019-03-07	4500	195	0.446368	25	1000	0.013339	0.0244333					380	1	0	2019-06-03		0	72	376	1	2019-06-03
2018-05-19	7	167	f	Y	Nhut	Neck lateral	7	5	2019-06-08												380	1	0	2019-06-03	2019-06-03	1	93	376	1	2019-06-03
2018-05-19	7	168	f	N	0	-	7	0	2018-05-28	121	69	0.436885					10879	181	0.0839602	0.0239667	386	0	1					376	0	2019-06-08
2018-05-19	7	168	f	N	0	-	7	1	2018-07-31	415	95	0.495592	26	294	0.0349749	0.134803	10879	181	0.0839602	0.0239667	386	0	1			0	64	376	0	2019-06-08
2018-05-19	7	168	f	N	0	-	7	2	2018-09-30	1402	127	0.613179	32	987	0.0333143	0.139699	10879	181	0.0839602	0.0239667	386	0	1			0	61	376	0	2019-06-08
2018-05-19	7	168	f	N	0	-	7	3	2018-12-25	4400	177	0.61019	50	2998	0.0270202	0.0930922	10879	181	0.0839602	0.0239667	386	0	1			0	86	376	0	2019-06-08
2018-05-19	7	168	f	N	0	-	7	4	2019-03-07	6500	205	0.542307	28	2100	0.0142781	0.0379359	10879	181	0.0839602	0.0239667	386	0	1			0	72	376	0	2019-06-08
2018-05-19	7	168	f	N	0	-	7	5	2019-06-08	11000	250	0.461871	45	4500	0.0149372	0.0395984	10879	181	0.0839602	0.0239667	386	0	1			0	93	376	0	2019-06-08
2018-05-19	7	169	f	Y	Nhut	Neck upper	7	0	2018-05-28	127	73	0.377317					5373	147	0.0701548	0.0205377	385	0	1					376	0	2019-06-08
2018-05-19	7	169	f	Y	Nhut	Neck upper	7	1	2018-07-31	416	94	0.515313	21	289	0.0276539	0.129773	5373	147	0.0701548	0.0205377	385	0	1			0	64	376	0	2019-06-08
2018-05-19	7	169	f	Y	Nhut	Neck upper	7	2	2018-09-30	1922	140	0.599999	46	1506	0.045712	0.175624	5373	147	0.0701548	0.0205377	385	0	1			0	61	376	0	2019-06-08
2018-05-19	7	169	f	Y	Nhut	Neck upper	7	3	2018-12-25	3300	170	0.526212	30	1378	0.0158034	0.0439988	5373	147	0.0701548	0.0205377	385	0	1			0	86	376	0	2019-06-08
2018-05-19	7	169	f	Y	Nhut	Neck upper	7	4	2019-03-07	4800	195	0.476125	25	1500	0.013339	0.0364285	5373	147	0.0701548	0.0205377	385	0	1			0	72	376	0	2019-06-08
2018-05-19	7	169	f	Y	Nhut	Neck upper	7	5	2019-06-08	5500	220	0.359402	25	700	0.0090795	0.0102465	5373	147	0.0701548	0.0205377	385	0	1			0	93	376	0	2019-06-08
2018-05-19	7	170	f	N	0	-	7	0	2018-05-28	137	75	0.370688					11063	175	0.0819836	0.0224144	384	0	1					376	0	2019-06-08
2018-05-19	7	170	f	N	0	-	7	1	2018-07-31	463	93	0.595155	18	326	0.0235278	0.133191	11063	175	0.0819836	0.0224144	384	0	1			0	64	376	0	2019-06-08
2018-05-19	7	170	f	N	0	-	7	2	2018-09-30	1872	141	0.570174	48	1409	0.0477561	0.160316	11063	175	0.0819836	0.0224144	384	0	1			0	61	376	0	2019-06-08
2018-05-19	7	170	f	N	0	-	7	3	2018-12-25	4800	185	0.571251	44	2928	0.0221066	0.0766426	11063	175	0.0819836	0.0224144	384	0	1			0	86	376	0	2019-06-08
2018-05-19	7	170	f	N	0	-	7	4	2019-03-07	8000	225	0.483658	40	3200	0.0190307	0.0496636	11063	175	0.0819836	0.0224144	384	0	1			0	72	376	0	2019-06-08
2018-05-19	7	170	f	N	0	-	7	5	2019-06-08	11200	250	0.470268	25	3200	0.0079304	0.0253259	11063	175	0.0819836	0.0224144	384	0	1			0	93	376	0	2019-06-08
2018-05-19	7	171	m	Y	Nhut	Neck upper	7	0	2018-05-28	137	71	0.448091					2363	99	0.054065	0.0162549	385	0	1					376	0	2019-06-08
2018-05-19	7	171	m	Y	Nhut	Neck upper	7	1	2018-07-31	420	98	0.450409	27	283	0.0352502	0.12253	2363	99	0.054065	0.0162549	385	0	1			0	64	376	0	2019-06-08
2018-05-19	7	171	m	Y	Nhut	Neck upper	7	2	2018-09-30	1402	135	0.496356	37	982	0.0367566	0.138325	2363	99	0.054065	0.0162549	385	0	1			0	61	376	0	2019-06-08
2018-05-19	7	171	m	Y	Nhut	Neck upper	7	3	2018-12-25	2800	165	0.495067	30	1398	0.0163337	0.0563028	2363	99	0.054065	0.0162549	385	0	1			0	86	376	0	2019-06-08
2018-05-19	7	171	m	Y	Nhut	Neck upper	7	4	2019-03-07	2200	165	0.388981	0	-600	0	-0.0234463	2363	99	0.054065	0.0162549	385	0	1			0	72	376	0	2019-06-08
2018-05-19	7	171	m	Y	Nhut	Neck upper	7	5	2019-06-08	2500	170	0.398645	5	300	0.002247	0.0096219	2363	99	0.054065	0.0162549	385	0	1			0	93	376	0	2019-06-08
2018-05-19	7	172	m	N	0	-	7	0	2018-05-28	95	65	0.421739					6705	155	0.0795096	0.0226986	385	0	1					376	0	2019-06-08
2018-05-19	7	172	m	N	0	-	7	1	2018-07-31	370	86	0.623501	21	275	0.0306206	0.148709	6705	155	0.0795096	0.0226986	385	0	1			0	64	376	0	2019-06-08
2018-05-19	7	172	m	N	0	-	7	2	2018-09-30	1528	128	0.650394	42	1158	0.0456357	0.162746	6705	155	0.0795096	0.0226986	385	0	1			0	61	376	0	2019-06-08
2018-05-19	7	172	m	N	0	-	7	3	2018-12-25	3700	167	0.627484	39	2172	0.0216482	0.0719839	6705	155	0.0795096	0.0226986	385	0	1			0	86	376	0	2019-06-08
2018-05-19	7	172	m	N	0	-	7	4	2019-03-07	4400	195	0.436448	28	700	0.01507	0.0168459	6705	155	0.0795096	0.0226986	385	0	1			0	72	376	0	2019-06-08
2018-05-19	7	172	m	N	0	-	7	5	2019-06-08	6800	220	0.444351	25	2400	0.0090795	0.0327659	6705	155	0.0795096	0.0226986	385	0	1			0	93	376	0	2019-06-08
2018-05-19	7	173	f	Y	Nhut	Neck lateral	7	0	2018-05-28	105	69	0.379115									350	1	0	2019-05-04				376	1	2019-05-04
2018-05-19	7	173	f	Y	Nhut	Neck lateral	7	1	2018-07-31	270	87	0.437147	18	165	0.0253533	0.103301					350	1	0	2019-05-04		0	64	376	1	2019-05-04
2018-05-19	7	173	f	Y	Nhut	Neck lateral	7	2	2018-09-30	1202	121	0.621537	34	932	0.0378554	0.171365					350	1	0	2019-05-04		0	61	376	1	2019-05-04
2018-05-19	7	173	f	Y	Nhut	Neck lateral	7	3	2018-12-25	2600	159	0.522564	38	1398	0.0222302	0.0627985					350	1	0	2019-05-04		0	86	376	1	2019-05-04
2018-05-19	7	173	f	Y	Nhut	Neck lateral	7	4	2019-03-07	2500	165	0.442024	6	-100	0.0036012	-0.0038131					350	1	0	2019-05-04		0	72	376	1	2019-05-04
2018-05-19	7	173	f	Y	Nhut	Neck lateral	7	5	2019-06-08												350	1	0	2019-05-04	2019-05-04	1	93	376	1	2019-05-04
2018-05-19	7	174	m	N	0	-	7	0	2018-05-28	85	62	0.444369					7215	158	0.0829012	0.0235783	385	0	1					376	0	2019-06-08
2018-05-19	7	174	m	N	0	-	7	1	2018-07-31	362	86	0.61002	24	277	0.0357889	0.158484	7215	158	0.0829012	0.0235783	385	0	1			0	64	376	0	2019-06-08
2018-05-19	7	174	m	N	0	-	7	2	2018-09-30	1222	120	0.650285	34	860	0.0382297	0.13961	7215	158	0.0829012	0.0235783	385	0	1			0	61	376	0	2019-06-08
2018-05-19	7	174	m	N	0	-	7	3	2018-12-25	3800	171	0.593768	51	2578	0.0288279	0.092344	7215	158	0.0829012	0.0235783	385	0	1			0	86	376	0	2019-06-08
2018-05-19	7	174	m	N	0	-	7	4	2019-03-07	4500	190	0.488343	19	700	0.0102434	0.016438	7215	158	0.0829012	0.0235783	385	0	1			0	72	376	0	2019-06-08
2018-05-19	7	174	m	N	0	-	7	5	2019-06-08	7300	220	0.477024	30	2800	0.0110347	0.0364148	7215	158	0.0829012	0.0235783	385	0	1			0	93	376	0	2019-06-08
2018-05-19	7	175	f	Y	Nhut	Neck lateral	7	0	2018-05-28	106	67	0.423728					4894	143	0.0717454	0.0212684	385	0	1					376	0	2019-06-08
2018-05-19	7	175	f	Y	Nhut	Neck lateral	7	1	2018-07-31	354	89	0.529802	22	248	0.0310563	0.131891	4894	143	0.0717454	0.0212684	385	0	1			0	64	376	0	2019-06-08
2018-05-19	7	175	f	Y	Nhut	Neck lateral	7	2	2018-09-30	1652	122	0.830243	33	1298	0.0361917	0.176772	4894	143	0.0717454	0.0212684	385	0	1			0	61	376	0	2019-06-08
2018-05-19	7	175	f	Y	Nhut	Neck lateral	7	3	2018-12-25	4000	176	0.5657	54	2348	0.0298284	0.0719785	4894	143	0.0717454	0.0212684	385	0	1			0	86	376	0	2019-06-08
2018-05-19	7	175	f	Y	Nhut	Neck lateral	7	4	2019-03-07	4500	195	0.446368	19	500	0.0099668	0.0114511	4894	143	0.0717454	0.0212684	385	0	1			0	72	376	0	2019-06-08
2018-05-19	7	175	f	Y	Nhut	Neck lateral	7	5	2019-06-08	5000	210	0.383788	15	500	0.005578	0.0079304	4894	143	0.0717454	0.0212684	385	0	1			0	93	376	0	2019-06-08
2018-05-19	7	176	f	N	0	-	8	0	2018-05-28	120	72	0.373948									337	1	0	2019-04-21				376	1	2019-04-21
2018-05-19	7	176	f	N	0	-	8	1	2018-07-31	524	98	0.561939	26	404	0.0337205	0.161219					337	1	0	2019-04-21		0	64	376	1	2019-04-21
2018-05-19	7	176	f	N	0	-	8	2	2018-09-30	2000	142	0.594446	44	1476	0.0425577	0.153703					337	1	0	2019-04-21		0	61	376	1	2019-04-21
2018-05-19	7	176	f	N	0	-	8	3	2018-12-25	3800	177	0.526982	35	1800	0.0179332	0.0522439					337	1	0	2019-04-21		0	86	376	1	2019-04-21
2018-05-19	7	176	f	N	0	-	8	4	2019-03-07	4400	195	0.436448	18	600	0.009416	0.0142531					337	1	0	2019-04-21		0	72	376	1	2019-04-21
2018-05-19	7	176	f	N	0	-	8	5	2019-06-08												337	1	0	2019-04-21	2019-04-21	1	93	376	1	2019-04-21
2018-05-19	7	177	m	Y	Nhut	Neck lateral	8	0	2018-05-28	98	65	0.435057					13902	200	0.0923748	0.0261633	386	0	1					376	0	2019-06-08
2018-05-19	7	177	m	Y	Nhut	Neck lateral	8	1	2018-07-31	418	93	0.53731	28	320	0.0391795	0.15865	13902	200	0.0923748	0.0261633	386	0	1			0	64	376	0	2019-06-08
2018-05-19	7	177	m	Y	Nhut	Neck lateral	8	2	2018-09-30	1872	140	0.58439	47	1454	0.0469394	0.172049	13902	200	0.0923748	0.0261633	386	0	1			0	61	376	0	2019-06-08
2018-05-19	7	177	m	Y	Nhut	Neck lateral	8	3	2018-12-25	5500	183	0.679645	43	3628	0.0218012	0.0877231	13902	200	0.0923748	0.0261633	386	0	1			0	86	376	0	2019-06-08
2018-05-19	7	177	m	Y	Nhut	Neck lateral	8	4	2019-03-07	8300	225	0.501795	42	2800	0.0200875	0.0400077	13902	200	0.0923748	0.0261633	386	0	1			0	72	376	0	2019-06-08
2018-05-19	7	177	m	Y	Nhut	Neck lateral	8	5	2019-06-08	14000	265	0.480504	40	5700	0.0123162	0.0393507	13902	200	0.0923748	0.0261633	386	0	1			0	93	376	0	2019-06-08
2018-05-19	7	178	f	N	0	-	8	0	2018-05-28	105	68	0.398757									30	1	0	2018-06-18				376	1	2018-06-18
2018-05-19	7	178	f	N	0	-	8	1	2018-07-31												30	1	0	2018-06-18	2018-06-18	1	64	376	1	2018-06-18
2018-05-19	7	178	f	N	0	-	8	2	2018-09-30												30	1	0	2018-06-18		0	61	376	1	2018-06-18
2018-05-19	7	178	f	N	0	-	8	3	2018-12-25												30	1	0	2018-06-18		0	86	376	1	2018-06-18
2018-05-19	7	178	f	N	0	-	8	4	2019-03-07												30	1	0	2018-06-18		0	72	376	1	2018-06-18
2018-05-19	7	178	f	N	0	-	8	5	2019-06-08												30	1	0	2018-06-18		0	93	376	1	2018-06-18
2018-05-19	7	179	m	Y	Nhut	Neck upper	8	0	2018-05-28	84	64	0.393456					5916	151	0.0794704	0.0225593	385	0	1					376	0	2019-06-08
2018-05-19	7	179	m	Y	Nhut	Neck upper	8	1	2018-07-31	278	80	0.601663	16	194	0.0244063	0.130901	5916	151	0.0794704	0.0225593	385	0	1			0	64	376	0	2019-06-08
2018-05-19	7	179	m	Y	Nhut	Neck upper	8	2	2018-09-30	1222	113	0.800608	33	944	0.0396316	0.169908	5916	151	0.0794704	0.0225593	385	0	1			0	61	376	0	2019-06-08
2018-05-19	7	179	m	Y	Nhut	Neck upper	8	3	2018-12-25	3400	169	0.553338	56	2178	0.0327625	0.0832908	5916	151	0.0794704	0.0225593	385	0	1			0	86	376	0	2019-06-08
2018-05-19	7	179	m	Y	Nhut	Neck upper	8	4	2019-03-07	5100	195	0.505883	26	1700	0.0139126	0.0394202	5916	151	0.0794704	0.0225593	385	0	1			0	72	376	0	2019-06-08
2018-05-19	7	179	m	Y	Nhut	Neck upper	8	5	2019-06-08	6000	215	0.424536	20	900	0.0073491	0.0122326	5916	151	0.0794704	0.0225593	385	0	1			0	93	376	0	2019-06-08
2018-05-18	8	180	m	N	0	-	8	0	2018-05-28	122	72	0.38018					13378	198	0.0876196	0.0246072	385	0	1					376	0	2019-06-08
2018-05-18	8	180	m	N	0	-	8	1	2018-07-31	378	93	0.485893	21	256	0.0279927	0.123689	13378	198	0.0876196	0.0246072	385	0	1			0	64	376	0	2019-06-08
2018-05-18	8	180	m	N	0	-	8	2	2018-09-30	1880	137	0.632564	44	1502	0.0444536	0.184081	13378	198	0.0876196	0.0246072	385	0	1			0	61	376	0	2019-06-08
2018-05-18	8	180	m	N	0	-	8	3	2018-12-25	5000	186	0.584057	49	3120	0.0248879	0.0796182	13378	198	0.0876196	0.0246072	385	0	1			0	86	376	0	2019-06-08
2018-05-18	8	180	m	N	0	-	8	4	2019-03-07	7800	230	0.437035	44	2800	0.0206435	0.0432333	13378	198	0.0876196	0.0246072	385	0	1			0	72	376	0	2019-06-08
2018-05-18	8	180	m	N	0	-	8	5	2019-06-08	13500	270	0.434325	40	5700	0.0120688	0.0412899	13378	198	0.0876196	0.0246072	385	0	1			0	93	376	0	2019-06-08
2018-05-18	8	181	f	Y	Nhut	Neck upper	8	0	2018-05-28	116	72	0.361483					5384	143	0.0718415	0.0203665	384	0	1					376	0	2019-06-08
2018-05-18	8	181	f	Y	Nhut	Neck upper	8	1	2018-07-31	365	94	0.452138	22	249	0.0291625	0.125377	5384	143	0.0718415	0.0203665	384	0	1			0	64	376	0	2019-06-08
2018-05-18	8	181	f	Y	Nhut	Neck upper	8	2	2018-09-30	1888	140	0.589385	46	1523	0.045712	0.188584	5384	143	0.0718415	0.0203665	384	0	1			0	61	376	0	2019-06-08
2018-05-18	8	181	f	Y	Nhut	Neck upper	8	3	2018-12-25	3200	165	0.56579	25	1312	0.0133735	0.0429469	5384	143	0.0718415	0.0203665	384	0	1			0	86	376	0	2019-06-08
2018-05-18	8	181	f	Y	Nhut	Neck upper	8	4	2019-03-07	5200	200	0.472541	35	2000	0.0187028	0.0472021	5384	143	0.0718415	0.0203665	384	0	1			0	72	376	0	2019-06-08
2018-05-18	8	181	f	Y	Nhut	Neck upper	8	5	2019-06-08	5500	215	0.389158	15	300	0.0054435	0.0042218	5384	143	0.0718415	0.0203665	384	0	1			0	93	376	0	2019-06-08
2018-05-18	8	182	m	N	0	-	8	0	2018-05-28	120	73	0.35652					9180	187	0.0809892	0.0236478	386	0	1					376	0	2019-06-08
2018-05-18	8	182	m	N	0	-	8	1	2018-07-31	348	94	0.431079	21	228	0.0276539	0.116453	9180	187	0.0809892	0.0236478	386	0	1			0	64	376	0	2019-06-08
2018-05-18	8	182	m	N	0	-	8	2	2018-09-30	1649	136	0.569084	42	1301	0.0423856	0.178526	9180	187	0.0809892	0.0236478	386	0	1			0	61	376	0	2019-06-08
2018-05-18	8	182	m	N	0	-	8	3	2018-12-25	5100	195	0.505883	59	3451	0.0293304	0.0919012	9180	187	0.0809892	0.0236478	386	0	1			0	86	376	0	2019-06-08
2018-05-18	8	182	m	N	0	-	8	4	2019-03-07	6900	220	0.450886	25	1800	0.0117277	0.0293884	9180	187	0.0809892	0.0236478	386	0	1			0	72	376	0	2019-06-08
2018-05-18	8	182	m	N	0	-	8	5	2019-06-08	9300	260	0.340938	40	2400	0.012574	0.0224672	9180	187	0.0809892	0.0236478	386	0	1			0	93	376	0	2019-06-08
2018-05-18	8	183	m	Y	Nhut	Neck upper	8	0	2018-05-28	88	63	0.435276									187	1	0	2018-11-21				376	1	2018-11-21
2018-05-18	8	183	m	Y	Nhut	Neck upper	8	1	2018-07-31	416	91	0.576514	28	328	0.0402199	0.169898					187	1	0	2018-11-21		0	64	376	1	2018-11-21
2018-05-18	8	183	m	Y	Nhut	Neck upper	8	2	2018-09-30	1655	133	0.61698	42	1239	0.043548	0.158461					187	1	0	2018-11-21		0	61	376	1	2018-11-21
2018-05-18	8	183	m	Y	Nhut	Neck upper	8	3	2018-12-25												187	1	0	2018-11-21	2018-11-21	1	86	376	1	2018-11-21
2018-05-18	8	183	m	Y	Nhut	Neck upper	8	4	2019-03-07												187	1	0	2018-11-21		0	72	376	1	2018-11-21
2018-05-18	8	183	m	Y	Nhut	Neck upper	8	5	2019-06-08												187	1	0	2018-11-21		0	93	376	1	2018-11-21
2018-05-18	8	184	f	N	0	-	8	0	2018-05-28	136	70	0.467197					10364	170	0.0809184	0.0229388	386	0	1					376	0	2019-06-08
2018-05-18	8	184	f	N	0	-	8	1	2018-07-31	480	94	0.594592	24	344	0.0322437	0.137936	10364	170	0.0809184	0.0229388	386	0	1			0	64	376	0	2019-06-08
2018-05-18	8	184	f	N	0	-	8	2	2018-09-30	2082	142	0.618818	48	1602	0.0473398	0.168378	10364	170	0.0809184	0.0229388	386	0	1			0	61	376	0	2019-06-08
2018-05-18	8	184	f	N	0	-	8	3	2018-12-25	5800	196	0.565226	54	3718	0.0262327	0.0833919	10364	170	0.0809184	0.0229388	386	0	1			0	86	376	0	2019-06-08
2018-05-18	8	184	f	N	0	-	8	4	2019-03-07	8500	230	0.476256	34	2700	0.0155521	0.0371591	10364	170	0.0809184	0.0229388	386	0	1			0	72	376	0	2019-06-08
2018-05-18	8	184	f	N	0	-	8	5	2019-06-08	10500	240	0.50776	10	2000	0.0032034	0.015905	10364	170	0.0809184	0.0229388	386	0	1			0	93	376	0	2019-06-08
2018-05-18	8	185	f	Y	Nhut	Neck upper	8	0	2018-05-28	119	71	0.389218					11881	189	0.0858903	0.0241649	386	0	1					376	0	2019-06-08
2018-05-18	8	185	f	Y	Nhut	Neck upper	8	1	2018-07-31	356	89	0.532795	18	237	0.024714	0.119854	11881	189	0.0858903	0.0241649	386	0	1			0	64	376	0	2019-06-08
2018-05-18	8	185	f	Y	Nhut	Neck upper	8	2	2018-09-30	1418	126	0.637374	37	1062	0.0398938	0.158598	11881	189	0.0858903	0.0241649	386	0	1			0	61	376	0	2019-06-08
2018-05-18	8	185	f	Y	Nhut	Neck upper	8	3	2018-12-25	5000	180	0.654225	54	3582	0.0290317	0.102574	11881	189	0.0858903	0.0241649	386	0	1			0	86	376	0	2019-06-08
2018-05-18	8	185	f	Y	Nhut	Neck upper	8	4	2019-03-07	8000	225	0.483658	45	3000	0.0216945	0.0456948	11881	189	0.0858903	0.0241649	386	0	1			0	72	376	0	2019-06-08
2018-05-18	8	185	f	Y	Nhut	Neck upper	8	5	2019-06-08	12000	260	0.43992	35	4000	0.0108825	0.0305189	11881	189	0.0858903	0.0241649	386	0	1			0	93	376	0	2019-06-08
2018-05-18	8	186	f	N	0	-	8	0	2018-05-28	89	68	0.337994									134	1	0	2018-09-29				376	1	2018-09-29
2018-05-18	8	186	f	N	0	-	8	1	2018-07-31	312	84	0.570359	16	223	0.0231119	0.137196					134	1	0	2018-09-29		0	64	376	1	2018-09-29
2018-05-18	8	186	f	N	0	-	8	2	2018-09-30												134	1	0	2018-09-29	2018-09-29	1	61	376	1	2018-09-29
2018-05-18	8	186	f	N	0	-	8	3	2018-12-25												134	1	0	2018-09-29		0	86	376	1	2018-09-29
2018-05-18	8	186	f	N	0	-	8	4	2019-03-07												134	1	0	2018-09-29		0	72	376	1	2018-09-29
2018-05-18	8	186	f	N	0	-	8	5	2019-06-08												134	1	0	2018-09-29		0	93	376	1	2018-09-29
2018-05-18	8	187	m	Y	Nhut	Neck upper	8	0	2018-05-28	140	75	0.378805					5060	145	0.0672963	0.0200345	386	0	1					376	0	2019-06-08
2018-05-18	8	187	m	Y	Nhut	Neck upper	8	1	2018-07-31	457	99	0.473171	24	317	0.030366	0.129395	5060	145	0.0672963	0.0200345	386	0	1			0	64	376	0	2019-06-08
2018-05-18	8	187	m	Y	Nhut	Neck upper	8	2	2018-09-30	1980	137	0.666211	38	1523	0.0372791	0.168249	5060	145	0.0672963	0.0200345	386	0	1			0	61	376	0	2019-06-08
2018-05-18	8	187	m	Y	Nhut	Neck upper	8	3	2018-12-25	2800	163	0.516403	26	820	0.014144	0.0282053	5060	145	0.0672963	0.0200345	386	0	1			0	86	376	0	2019-06-08
2018-05-18	8	187	m	Y	Nhut	Neck upper	8	4	2019-03-07	3200	170	0.510266	7	400	0.004088	0.0129822	5060	145	0.0672963	0.0200345	386	0	1			0	72	376	0	2019-06-08
2018-05-18	8	187	m	Y	Nhut	Neck upper	8	5	2019-06-08	5200	220	0.339798	50	2000	0.0194065	0.0365436	5060	145	0.0672963	0.0200345	386	0	1			0	93	376	0	2019-06-08
2018-05-18	8	188	f	N	0	-	8	0	2018-05-28	125	68	0.474711					8075	162	0.0778857	0.0226862	386	0	1					376	0	2019-06-08
2018-05-18	8	188	f	N	0	-	8	1	2018-07-31	305	84	0.557562	16	180	0.0231119	0.0975623	8075	162	0.0778857	0.0226862	386	0	1			0	64	376	0	2019-06-08
2018-05-18	8	188	f	N	0	-	8	2	2018-09-30	1520	130	0.613196	46	1215	0.0501151	0.184313	8075	162	0.0778857	0.0226862	386	0	1			0	61	376	0	2019-06-08
2018-05-18	8	188	f	N	0	-	8	3	2018-12-25	3100	165	0.548109	35	1580	0.0194055	0.0580098	8075	162	0.0778857	0.0226862	386	0	1			0	86	376	0	2019-06-08
2018-05-18	8	188	f	N	0	-	8	4	2019-03-07	5700	195	0.565399	30	2600	0.0162414	0.0592146	8075	162	0.0778857	0.0226862	386	0	1			0	72	376	0	2019-06-08
2018-05-18	8	188	f	N	0	-	8	5	2019-06-08	8200	230	0.459447	35	2500	0.0124254	0.0273729	8075	162	0.0778857	0.0226862	386	0	1			0	93	376	0	2019-06-08
2018-05-18	8	189	f	Y	Nhut	Neck upper	8	0	2018-05-28	70	63	0.346242					6930	157	0.0857346	0.0232805	385	0	1					376	0	2019-06-08
2018-05-18	8	189	f	Y	Nhut	Neck upper	8	1	2018-07-31	290	80	0.627634	17	220	0.0261288	0.155464	6930	157	0.0857346	0.0232805	385	0	1			0	64	376	0	2019-06-08
2018-05-18	8	189	f	Y	Nhut	Neck upper	8	2	2018-09-30	1320	128	0.561859	48	1030	0.0539348	0.17391	6930	157	0.0857346	0.0232805	385	0	1			0	61	376	0	2019-06-08
2018-05-18	8	189	f	Y	Nhut	Neck upper	8	3	2018-12-25	4500	188	0.506555	60	3180	0.0312893	0.099827	6930	157	0.0857346	0.0232805	385	0	1			0	86	376	0	2019-06-08
2018-05-18	8	189	f	Y	Nhut	Neck upper	8	4	2019-03-07	5200	200	0.472541	12	700	0.0060157	0.0140565	6930	157	0.0857346	0.0232805	385	0	1			0	72	376	0	2019-06-08
2018-05-18	8	189	f	Y	Nhut	Neck upper	8	5	2019-06-08	7000	220	0.45742	20	1800	0.0071739	0.0223738	6930	157	0.0857346	0.0232805	385	0	1			0	93	376	0	2019-06-08
2018-05-18	8	190	m	N	0	-	8	0	2018-05-28	114	72	0.35525									118	1	0	2018-09-13				376	1	2018-09-13
2018-05-18	8	190	m	N	0	-	8	1	2018-07-31	295	81	0.611595	9	181	0.0128825	0.103991					118	1	0	2018-09-13		0	64	376	1	2018-09-13
2018-05-18	8	190	m	N	0	-	8	2	2018-09-30												118	1	0	2018-09-13	2018-09-13	1	61	376	1	2018-09-13
2018-05-18	8	190	m	N	0	-	8	3	2018-12-25												118	1	0	2018-09-13		0	86	376	1	2018-09-13
2018-05-18	8	190	m	N	0	-	8	4	2019-03-07												118	1	0	2018-09-13		0	72	376	1	2018-09-13
2018-05-18	8	190	m	N	0	-	8	5	2019-06-08												118	1	0	2018-09-13		0	93	376	1	2018-09-13
2018-05-18	8	191	f	Y	Nhut	Neck upper	8	0	2018-05-28	124	70	0.425973					14876	205	0.0892784	0.0254732	386	0	1					376	0	2019-06-08
2018-05-18	8	191	f	Y	Nhut	Neck upper	8	1	2018-07-31	320	97	0.355566	27	196	0.0356798	0.103692	14876	205	0.0892784	0.0254732	386	0	1			0	64	376	0	2019-06-08
2018-05-18	8	191	f	Y	Nhut	Neck upper	8	2	2018-09-30	1841	140	0.574713	43	1521	0.0421069	0.20079	14876	205	0.0892784	0.0254732	386	0	1			0	61	376	0	2019-06-08
2018-05-18	8	191	f	Y	Nhut	Neck upper	8	3	2018-12-25	6400	200	0.581589	60	4559	0.0290317	0.101418	14876	205	0.0892784	0.0254732	386	0	1			0	86	376	0	2019-06-08
2018-05-18	8	191	f	Y	Nhut	Neck upper	8	4	2019-03-07	9200	235	0.478512	35	2800	0.0156788	0.0352825	14876	205	0.0892784	0.0254732	386	0	1			0	72	376	0	2019-06-08
2018-05-18	8	191	f	Y	Nhut	Neck upper	8	5	2019-06-08	15000	275	0.452898	40	5800	0.0118312	0.0367949	14876	205	0.0892784	0.0254732	386	0	1			0	93	376	0	2019-06-08
2018-05-18	8	192	m	N	0	-	8	0	2018-05-28	81	65	0.359588					4419	125	0.0747917	0.0199693	386	0	1					376	0	2019-06-08
2018-05-18	8	192	m	N	0	-	8	1	2018-07-31	227	80	0.491286	15	146	0.0227106	0.112711	4419	125	0.0747917	0.0199693	386	0	1			0	64	376	0	2019-06-08
2018-05-18	8	192	m	N	0	-	8	2	2018-09-30	640	95	0.764287	15	413	0.0197205	0.118945	4419	125	0.0747917	0.0199693	386	0	1			0	61	376	0	2019-06-08
2018-05-18	8	192	m	N	0	-	8	3	2018-12-25	1700	130	0.685812	35	1060	0.0255303	0.0795164	4419	125	0.0747917	0.0199693	386	0	1			0	86	376	0	2019-06-08
2018-05-18	8	192	m	N	0	-	8	4	2019-03-07	2400	150	0.590113	20	700	0.0139126	0.0335262	4419	125	0.0747917	0.0199693	386	0	1			0	72	376	0	2019-06-08
2018-05-18	8	192	m	N	0	-	8	5	2019-06-08	4500	190	0.488343	40	2100	0.0177927	0.0473146	4419	125	0.0747917	0.0199693	386	0	1			0	93	376	0	2019-06-08
2018-05-18	8	193	f	Y	Nhut	Neck lateral	8	0	2018-05-28	95	68	0.36078									380	1	0	2019-06-02				376	1	2019-06-02
2018-05-18	8	193	f	Y	Nhut	Neck lateral	8	1	2018-07-31	323	89	0.483407	21	228	0.0294359	0.13385					380	1	0	2019-06-02		0	64	376	1	2019-06-02
2018-05-18	8	193	f	Y	Nhut	Neck lateral	8	2	2018-09-30	1875	141	0.571088	52	1552	0.0528011	0.201819					380	1	0	2019-06-02		0	61	376	1	2019-06-02
2018-05-18	8	193	f	Y	Nhut	Neck lateral	8	3	2018-12-25	6200	194	0.626034	53	4325	0.0259731	0.097344					380	1	0	2019-06-02		0	86	376	1	2019-06-02
2018-05-18	8	193	f	Y	Nhut	Neck lateral	8	4	2019-03-07	9100	230	0.509874	36	2900	0.0165493	0.0373066					380	1	0	2019-06-02		0	72	376	1	2019-06-02
2018-05-18	8	193	f	Y	Nhut	Neck lateral	8	5	2019-06-08												380	1	0	2019-06-02	2019-06-02	1	93	376	1	2019-06-02
2018-05-18	8	194	f	N	0	-	8	0	2018-05-28	89	64	0.416876					9911	171	0.0879041	0.0242152	386	0	1					376	0	2019-06-08
2018-05-18	8	194	f	N	0	-	8	1	2018-07-31	152	68	0.577248	4	63	0.0066308	0.0585423	9911	171	0.0879041	0.0242152	386	0	1			0	64	376	0	2019-06-08
2018-05-18	8	194	f	N	0	-	8	2	2018-09-30	1258	115	0.775651	47	1106	0.0602946	0.242521	9911	171	0.0879041	0.0242152	386	0	1			0	61	376	0	2019-06-08
2018-05-18	8	194	f	N	0	-	8	3	2018-12-25	3800	171	0.593768	56	2542	0.0322921	0.0899808	9911	171	0.0879041	0.0242152	386	0	1			0	86	376	0	2019-06-08
2018-05-18	8	194	f	N	0	-	8	4	2019-03-07	6400	205	0.533964	34	2600	0.0176309	0.0506816	9911	171	0.0879041	0.0242152	386	0	1			0	72	376	0	2019-06-08
2018-05-18	8	194	f	N	0	-	8	5	2019-06-08	10000	235	0.520122	30	3600	0.0102799	0.0335915	9911	171	0.0879041	0.0242152	386	0	1			0	93	376	0	2019-06-08
2018-05-18	8	195	f	Y	Nhut	Neck lateral	8	0	2018-05-28	92	62	0.480964					12908	203	0.0921713	0.027043	384	0	1					376	0	2019-06-08
2018-05-18	8	195	f	Y	Nhut	Neck lateral	8	1	2018-07-31	288	88	0.448211	26	196	0.0383034	0.124816	12908	203	0.0921713	0.027043	384	0	1			0	64	376	0	2019-06-08
2018-05-18	8	195	f	Y	Nhut	Neck lateral	8	2	2018-09-30	1277	119	0.699517	31	989	0.0346313	0.170904	12908	203	0.0921713	0.027043	384	0	1			0	61	376	0	2019-06-08
2018-05-18	8	195	f	Y	Nhut	Neck lateral	8	3	2018-12-25	5700	188	0.641636	69	4423	0.0372236	0.121764	12908	203	0.0921713	0.027043	384	0	1			0	86	376	0	2019-06-08
2018-05-18	8	195	f	Y	Nhut	Neck lateral	8	4	2019-03-07	7700	220	0.503162	32	2000	0.0152819	0.02924	12908	203	0.0921713	0.027043	384	0	1			0	72	376	0	2019-06-08
2018-05-18	8	195	f	Y	Nhut	Neck lateral	8	5	2019-06-08	13000	265	0.446183	45	5300	0.0140077	0.0394205	12908	203	0.0921713	0.027043	384	0	1			0	93	376	0	2019-06-08
2018-05-18	8	196	m	N	0	-	8	0	2018-05-28	75	63	0.370974					7925	167	0.0869361	0.024108	385	0	1					376	0	2019-06-08
2018-05-18	8	196	m	N	0	-	8	1	2018-07-31	235	79	0.531224	16	160	0.024753	0.124917	7925	167	0.0869361	0.024108	385	0	1			0	64	376	0	2019-06-08
2018-05-18	8	196	m	N	0	-	8	2	2018-09-30	1145	113	0.75016	34	910	0.0410751	0.181722	7925	167	0.0869361	0.024108	385	0	1			0	61	376	0	2019-06-08
2018-05-18	8	196	m	N	0	-	8	3	2018-12-25	3700	174	0.544379	61	2555	0.0351357	0.0954709	7925	167	0.0869361	0.024108	385	0	1			0	86	376	0	2019-06-08
2018-05-18	8	196	m	N	0	-	8	4	2019-03-07	6000	200	0.54524	26	2300	0.0135394	0.0469998	7925	167	0.0869361	0.024108	385	0	1			0	72	376	0	2019-06-08
2018-05-18	8	196	m	N	0	-	8	5	2019-06-08	8000	230	0.448241	30	2000	0.0105197	0.0216535	7925	167	0.0869361	0.024108	385	0	1			0	93	376	0	2019-06-08
2018-05-18	8	197	m	Y	Nhut	Neck upper	8	0	2018-05-28	77	64	0.360668					9623	171	0.0900333	0.0242152	385	0	1					376	0	2019-06-08
2018-05-18	8	197	m	Y	Nhut	Neck upper	8	1	2018-07-31	335	82	0.665655	18	258	0.0271071	0.160817	9623	171	0.0900333	0.0242152	385	0	1			0	64	376	0	2019-06-08
2018-05-18	8	197	m	Y	Nhut	Neck upper	8	2	2018-09-30	1458	132	0.55792	50	1123	0.0546324	0.168768	9623	171	0.0900333	0.0242152	385	0	1			0	61	376	0	2019-06-08
2018-05-18	8	197	m	Y	Nhut	Neck upper	8	3	2018-12-25	4000	172	0.612536	40	2542	0.0215447	0.0821465	9623	171	0.0900333	0.0242152	385	0	1			0	86	376	0	2019-06-08
2018-05-18	8	197	m	Y	Nhut	Neck upper	8	4	2019-03-07	6000	210	0.460545	38	2000	0.0194068	0.0394202	9623	171	0.0900333	0.0242152	385	0	1			0	72	376	0	2019-06-08
2018-05-18	8	197	m	Y	Nhut	Neck upper	8	5	2019-06-08	9700	235	0.504518	25	3700	0.0084661	0.0361566	9623	171	0.0900333	0.0242152	385	0	1			0	93	376	0	2019-06-08
2018-05-18	8	198	m	N	0	-	8	0	2018-05-28	114	72	0.35525					8386	178	0.0802696	0.0231744	384	0	1					376	0	2019-06-08
2018-05-18	8	198	m	N	0	-	8	1	2018-07-31	528	97	0.586683	25	414	0.0325987	0.167661	8386	178	0.0802696	0.0231744	384	0	1			0	64	376	0	2019-06-08
2018-05-18	8	198	m	N	0	-	8	2	2018-09-30	2072	146	0.559408	49	1544	0.0469224	0.156889	8386	178	0.0802696	0.0231744	384	0	1			0	61	376	0	2019-06-08
2018-05-18	8	198	m	N	0	-	8	3	2018-12-25	4300	180	0.562634	34	2228	0.0170401	0.0594268	8386	178	0.0802696	0.0231744	384	0	1			0	86	376	0	2019-06-08
2018-05-18	8	198	m	N	0	-	8	4	2019-03-07	6600	215	0.466989	35	2300	0.0172746	0.0416553	8386	178	0.0802696	0.0231744	384	0	1			0	72	376	0	2019-06-08
2018-05-18	8	198	m	N	0	-	8	5	2019-06-08	8500	250	0.3569	35	1900	0.0113523	0.0190427	8386	178	0.0802696	0.0231744	384	0	1			0	93	376	0	2019-06-08
2018-05-18	8	199	f	Y	Nhut	Neck lateral	8	0	2018-05-28	114	73	0.338694									105	1	0	2018-08-31				376	1	2018-08-31
2018-05-18	8	199	f	Y	Nhut	Neck lateral	8	1	2018-07-31	366	91	0.507222	18	252	0.0241063	0.127579					105	1	0	2018-08-31		0	64	376	1	2018-08-31
2018-05-18	8	199	f	Y	Nhut	Neck lateral	8	2	2018-09-30												105	1	0	2018-08-31	2018-08-31	1	61	376	1	2018-08-31
2018-05-18	8	199	f	Y	Nhut	Neck lateral	8	3	2018-12-25												105	1	0	2018-08-31		0	86	376	1	2018-08-31
2018-05-18	8	199	f	Y	Nhut	Neck lateral	8	4	2019-03-07												105	1	0	2018-08-31		0	72	376	1	2018-08-31
2018-05-18	8	199	f	Y	Nhut	Neck lateral	8	5	2019-06-08												105	1	0	2018-08-31		0	93	376	1	2018-08-31
2018-05-18	8	200	f	N	0	-	8	0	2018-05-28	76	64	0.355984					9524	176	0.0900838	0.0246072	386	0	1					376	0	2019-06-08
2018-05-18	8	200	f	N	0	-	8	1	2018-07-31	277	85	0.48606	21	201	0.0310371	0.141453	9524	176	0.0900838	0.0246072	386	0	1			0	64	376	0	2019-06-08
2018-05-18	8	200	f	N	0	-	8	2	2018-09-30	1602	120	0.852502	35	1325	0.0395719	0.201392	9524	176	0.0900838	0.0246072	386	0	1			0	61	376	0	2019-06-08
2018-05-18	8	200	f	N	0	-	8	3	2018-12-25	4000	175	0.576963	55	2398	0.03071	0.0744801	9524	176	0.0900838	0.0246072	386	0	1			0	86	376	0	2019-06-08
2018-05-18	8	200	f	N	0	-	8	4	2019-03-07	6200	210	0.475897	35	2200	0.0177257	0.0426081	9524	176	0.0900838	0.0246072	386	0	1			0	72	376	0	2019-06-08
2018-05-18	8	200	f	N	0	-	8	5	2019-06-08	9600	240	0.464238	30	3400	0.0100508	0.0329086	9524	176	0.0900838	0.0246072	386	0	1			0	93	376	0	2019-06-08

## Sheet: Time_05
Date_t0	Hatchling_date	Pen_ID_t0	Scale_ID	Clutch_ID	PIT_TAG	TAGGER	LOCATION	PIT_ID	Sex_t0	Weight_t0	Length_t0	Comments_t0	Date_t1	Weight_t1	Length_t1	Comments_t1	Death_p1	Date_t2	Weight_t2	Length_t2	Comments_t2	Death_p2	Date_t3	Weight_t3	Length_t3	Comments_t3	Death_p3	Date_t4	Weight_t4	Length_t4	Comments_t4	Death_p4	Date_t5	Weight_t5	Length_t5	Comments_t5	Death_p5	Death_date	Days_survived	Event1	Event2
2018-05-28	2018-05-20	1	9	1	Y	Kien	Neck upper	981020000220374	f	116	66		2018-07-31	268	90			2018-09-30	1447	132			2018-12-25	1400	142			2019-03-07	1500	145			2019-06-08				2019-03-12	2019-03-12	296	1	0
2018-05-28	2018-05-20	2	35	2	Y	Kien	Neck	981020000220384	m	98	61		2018-07-31	358	89			2018-09-30	1291	129			2018-12-25	2600	148			2019-03-07	2000	150			2019-06-08				2019-03-21	2019-03-21	305	1	0
2018-05-28	2018-05-19	6	140	6	N	Nhut	-	-	f	92	65		2018-07-31	425	86			2018-09-30	1284	128			2018-12-25	1700	145			2019-03-07	1800	150			2019-06-08				2019-03-25	2019-03-25	310	1	0
2018-05-28	2018-05-20	3	68	3	N	Huu	-	-	m	125	69		2018-07-31	400	94			2018-09-30	1768	136			2018-12-25	1500	136			2019-03-07	1000	138			2019-06-08				2019-03-30	2019-03-30	314	1	0
2018-05-28	2018-05-20	1	4	1	N	Kien	-	-	f	126	68		2018-07-31	315	84			2018-09-30	785	110			2018-12-25	1700	137			2019-03-07	1400	140			2019-06-08				2019-03-31	2019-03-31	315	1	0
2018-05-28	2018-05-20	3	69	3	Y	Huu	Neck lateral	981020000221528	f	88	62		2018-07-31	396	91			2018-09-30	1438	123			2018-12-25	2200	146			2019-03-07	2400	155			2019-06-08				2019-04-05	2019-04-05	320	1	0
2018-05-28	2018-05-20	1	22	1	N	Kien	-	-	m	100	60		2018-07-31	426	91			2018-09-30	1657	131			2018-12-25	2000	140			2019-03-07	1800	150			2019-06-08				2019-04-08	2019-04-08	323	1	0
2018-05-28	2018-05-20	3	52	2	N	Kien	-	-	f	97	68		2018-07-31	364	93			2018-09-30	1415	137			2018-12-25	3600	169			2019-03-07	5200	190			2019-06-08				2019-04-15	2019-04-15	330	1	0
2018-05-28	2018-05-19	7	158	6	N	Nhut	-	-	f	78	63		2018-07-31	303	86			2018-09-30	1000	113			2018-12-25	2600	160			2019-03-07	2000	165			2019-06-08				2019-04-19	2019-04-19	335	1	0
2018-05-28	2018-05-19	8	176	7	N	Nhut	-	-	f	120	72		2018-07-31	524	98			2018-09-30	2000	142			2018-12-25	3800	177			2019-03-07	4400	195			2019-06-08				2019-04-21	2019-04-21	337	1	0
2018-05-28	2018-05-19	6	137	6	Y	Nhut	Neck upper	981020000221525	f	78	64		2018-07-31	337	90			2018-09-30	1257	123			2018-12-25	2000	140			2019-03-07	2000	140			2019-06-08				2019-04-28	2019-04-28	344	1	0
2018-05-28	2018-05-20	2	30	2	N	Kien	-	-	f	99	69		2018-07-31	358	94			2018-09-30	1445	131			2018-12-25	1800	135			2019-03-07	1300	140			2019-06-08				2019-05-02	2019-05-02	347	1	0
2018-05-28	2018-05-19	7	173	7	Y	Nhut	Neck lateral	981020000221558	f	105	69		2018-07-31	270	87			2018-09-30	1202	121			2018-12-25	2600	159			2019-03-07	2500	165			2019-06-08				2019-05-04	2019-05-04	350	1	0
2018-05-28	2018-05-20	1	2	1	N	Kien	-	-	f	125	69		2018-07-31	387	90			2018-09-30	1419	135			2018-12-25	3300	165			2019-03-07	4300	195			2019-06-08				2019-05-28	2019-05-28	373	1	0
2018-05-28	2018-05-18	4	79	4	Y	Huu	Neck upper	981020000221531	m	108	63		2018-07-31	416	95			2018-09-30	1628	132			2018-12-25	1400	151			2019-03-07	1200	160			2019-06-08				2019-05-28	2019-05-28	375	1	0
2018-05-28	2018-05-18	8	193	8	Y	Nhut	Neck lateral	981020000221563	f	95	68		2018-07-31	323	89			2018-09-30	1875	141			2018-12-25	6200	194			2019-03-07	9100	230			2019-06-08				2019-06-02	2019-06-02	380	1	0
2018-05-28	2018-05-19	7	167	7	Y	Nhut	Neck lateral	981020000221551	f	136	66		2018-07-31	491	92			2018-09-30	1611	134			2018-12-25	3500	170			2019-03-07	4500	195			2019-06-08				2019-06-03	2019-06-03	380	1	0
2018-05-28	2018-05-18	8	191	8	Y	Nhut	Neck upper	981020000221539	f	124	70		2018-07-31	320	97			2018-09-30	1841	140			2018-12-25	6400	200			2019-03-07	9200	235			2019-06-08	15000	275				386	0	1
2018-05-28	2018-05-19	5	123	5	Y	Huu	Neck upper	981020000220204	f	111	75		2018-07-31	477	100			2018-09-30	1978	135			2018-12-25	4200	188			2019-03-07	8000	230			2019-06-08	12400	275				385	0	1
2018-05-28	2018-05-19	6	138	6	N	Nhut	-	-	f	97	68		2018-07-31	318	90			2018-09-30	1657	130			2018-12-25	5600	194			2019-03-07	9000	230			2019-06-08	16000	280				385	0	1
2018-05-28	2018-05-18	8	184	8	N	Nhut	-	-	f	136	70		2018-07-31	480	94			2018-09-30	2082	142			2018-12-25	5800	196			2019-03-07	8500	230			2019-06-08	10500	240				386	0	1
2018-05-28	2018-05-18	5	104	4	N	Huu	-	-	m	127	73		2018-07-31	568	102			2018-09-30	1957	148			2018-12-25	5200	195			2019-03-07	8400	230			2019-06-08	8000	240				385	0	1
2018-05-28	2018-05-18	8	180	8	N	Nhut	-	-	m	122	72		2018-07-31	378	93			2018-09-30	1880	137			2018-12-25	5000	186			2019-03-07	7800	230			2019-06-08	13500	270				385	0	1
2018-05-28	2018-05-19	7	162	7	N	Nhut	-	-	f	100	64		2018-07-31	442	90			2018-09-30	1600	133			2018-12-25	5500	186			2019-03-07	8400	225			2019-06-08	11700	250				386	0	1
2018-05-28	2018-05-19	7	170	7	N	Nhut	-	-	f	137	75		2018-07-31	463	93			2018-09-30	1872	141			2018-12-25	4800	185			2019-03-07	8000	225			2019-06-08	11200	250				384	0	1
2018-05-28	2018-05-18	8	185	8	Y	Nhut	Neck upper	981020000221571	f	119	71		2018-07-31	356	89			2018-09-30	1418	126			2018-12-25	5000	180			2019-03-07	8000	225			2019-06-08	12000	260				386	0	1
2018-05-28	2018-05-19	8	177	7	Y	Nhut	Neck lateral	981020000221535	m	98	65		2018-07-31	418	93			2018-09-30	1872	140			2018-12-25	5500	183			2019-03-07	8300	225			2019-06-08	14000	265				386	0	1
2018-05-28	2018-05-20	2	43	2	Y	Kien	Neck	981020000220382	f	100	65		2018-07-31	412	99			2018-09-30	1873	141			2018-12-25	4400	182			2019-03-07	7700	220			2019-06-08	13400	270				386	0	1
2018-05-28	2018-05-18	4	80	4	N	Huu	-	-	f	100	66		2018-07-31	327	87			2018-09-30	1380	132			2018-12-25	4800	178			2019-03-07	8200	220			2019-06-08	13800	270				385	0	1
2018-05-28	2018-05-18	4	88	4	N	Huu	-	-	f	133	73		2018-07-31	365	98			2018-09-30	1656	140			2018-12-25	4400	185			2019-03-07	6900	220			2019-06-08	10300	250				385	0	1
2018-05-28	2018-05-18	4	98	4	N	Huu	-	-	f	94	65		2018-07-31	434	92			2018-09-30	1676	135			2018-12-25	5300	194			2019-03-07	7800	220			2019-06-08	11000	255				385	0	1
2018-05-28	2018-05-19	5	108	5	N	Huu	-	-	f	113	71		2018-07-31	387	95			2018-09-30	1205	120			2018-12-25	4000	177			2019-03-07	7200	220			2019-06-08	7200	235				386	0	1
2018-05-28	2018-05-19	6	129	5	Y	Huu	Neck upper	981020000220418	f	103	66		2018-07-31	425	94			2018-09-30	1580	131			2018-12-25	5500	185			2019-03-07	8300	220			2019-06-08	8500	230				386	0	1
2018-05-28	2018-05-19	6	131	5	Y	Huu	Neck upper	981020000221607	f	88	62		2018-07-31	311	85			2018-09-30	1300	120			2018-12-25	4900	180			2019-03-07	7600	220			2019-06-08	13200	270				384	0	1
2018-05-28	2018-05-18	8	195	8	Y	Nhut	Neck lateral	981020000220183	f	92	62		2018-07-31	288	88			2018-09-30	1277	119			2018-12-25	5700	188			2019-03-07	7700	220			2019-06-08	13000	265				384	0	1
2018-05-28	2018-05-19	6	128	5	N	Huu	-	-	m	115	72		2018-07-31	486	94			2018-09-30	1438	126			2018-12-25	3800	182			2019-03-07	5500	220			2019-06-08	8400	260				385	0	1
2018-05-28	2018-05-19	7	157	6	Y	Nhut	Neck upper	981020000221529	m	97	65		2018-07-31	495	93			2018-09-30	1570	130			2018-12-25	4400	185			2019-03-07	8200	220			2019-06-08	11000	255				385	0	1
2018-05-28	2018-05-19	7	161	7	Y	Nhut	Neck lateral	981020000221566	m	98	65		2018-07-31	436	90			2018-09-30	1722	137			2018-12-25	4600	180			2019-03-07	7400	220			2019-06-08	11000	255				385	0	1
2018-05-28	2018-05-19	7	163	7	Y	Nhut	Neck lateral	981020000220157	m	131	75		2018-07-31	526	100			2018-09-30	1652	136			2018-12-25	5000	190			2019-03-07	7000	220			2019-06-08	8500	260				386	0	1
2018-05-28	2018-05-18	8	182	8	N	Nhut	-	-	m	120	73		2018-07-31	348	94			2018-09-30	1649	136			2018-12-25	5100	195			2019-03-07	6900	220			2019-06-08	9300	260				386	0	1
2018-05-28	2018-05-18	4	85	4	Y	Huu	Neck upper	981020000220400	f	95	64		2018-07-31	335	90			2018-09-30	1879	135			2018-12-25	4400	187			2019-03-07	7500	215			2019-06-08	11700	265				385	0	1
2018-05-28	2018-05-18	4	90	4	N	Huu	-	-	m	124	71		2018-07-31	400	98			2018-09-30	1858	133			2018-12-25	4200	185			2019-03-07	6300	215			2019-06-08	11000	265				386	0	1
2018-05-28	2018-05-18	8	198	8	N	Nhut	-	-	m	114	72		2018-07-31	528	97			2018-09-30	2072	146			2018-12-25	4300	180			2019-03-07	6600	215			2019-06-08	8500	250				384	0	1
2018-05-28	2018-05-20	1	18	1	N	Kien	-	-	f	100	63		2018-07-31	354	91			2018-09-30	1415	126			2018-12-25			missing		2019-03-07	6200	210			2019-06-08	12200	250				384	0	1
2018-05-28	2018-05-20	3	54	2	N	Kien	-	-	f	109	68		2018-07-31	374	99			2018-09-30	1741	135			2018-12-25	4400	185			2019-03-07	6000	210			2019-06-08	6500	240				384	0	1
2018-05-28	2018-05-19	5	114	5	N	Huu	-	-	f	122	74		2018-07-31	210	81			2018-09-30	1030	110			2018-12-25	3300	163			2019-03-07	5300	210			2019-06-08	6200	235				384	0	1
2018-05-28	2018-05-19	6	127	5	Y	Huu	Neck upper	981020000220153	f	124	75		2018-07-31	420	95			2018-09-30	1780	132			2018-12-25	5600	190			2019-03-07	6200	210			2019-06-08	6000	220				384	0	1
2018-05-28	2018-05-19	6	145	6	Y	Nhut	Neck lateral	981020000221533	f	115	70		2018-07-31	431	95			2018-09-30	1738	140			2018-12-25	4400	175			2019-03-07	5800	210			2019-06-08	8000	240				384	0	1
2018-05-28	2018-05-18	8	200	8	N	Nhut	-	-	f	76	64		2018-07-31	277	85			2018-09-30	1602	120			2018-12-25	4000	175			2019-03-07	6200	210			2019-06-08	9600	240				386	0	1
2018-05-28	2018-05-20	1	13	1	Y	Kien	Neck lateral	981020000220415	m	110	67		2018-07-31	283	86			2018-09-30	1025	117			2018-12-25	3200	162			2019-03-07	5000	210			2019-06-08	8500	240				386	0	1
2018-05-28	2018-05-20	4	77	3	Y	Huu	Neck upper	981020000220202	m	103	66		2018-07-31	293	90			2018-09-30	1171	125			2018-12-25	3900	175			2019-03-07	6000	210			2019-06-08	8000	245				386	0	1
2018-05-28	2018-05-18	5	101	4	Y	Huu	Neck upper	981020000221526	m	104	67		2018-07-31	298	86			2018-09-30	1654	129			2018-12-25	5000	180			2019-03-07	7000	210			2019-06-08	9500	245				386	0	1
2018-05-28	2018-05-19	5	120	5	N	Huu	-	-	m	85	65		2018-07-31	414	95			2018-09-30	1500	123			2018-12-25	4100	178			2019-03-07	6700	210			2019-06-08	9800	255				385	0	1
2018-05-28	2018-05-19	5	122	5	N	Huu	-	-	m	123	72		2018-07-31	306	83			2018-09-30	1180	117			2018-12-25	4000	175			2019-03-07	7500	210			2019-06-08	7300	240				385	0	1
2018-05-28	2018-05-19	6	132	6	N	Huu	-	-	m	113	74		2018-07-31	367	90			2018-09-30	1854	135			2018-12-25	4400	181			2019-03-07	5200	210			2019-06-08	8400	245				385	0	1
2018-05-28	2018-05-18	8	197	8	Y	Nhut	Neck upper	981020000221567	m	77	64		2018-07-31	335	82			2018-09-30	1458	132			2018-12-25	4000	172			2019-03-07	6000	210			2019-06-08	9700	235				385	0	1
2018-05-28	2018-05-18	4	82	4	N	Huu	-	-	f	129	72		2018-07-31	500	100			2018-09-30	1910	141			2018-12-25	4800	164			2019-03-07	4800	205			2019-06-08	5200	225				385	0	1
2018-05-28	2018-05-19	7	168	7	N	Nhut	-	-	f	121	69		2018-07-31	415	95			2018-09-30	1402	127			2018-12-25	4400	177			2019-03-07	6500	205			2019-06-08	11000	250				386	0	1
2018-05-28	2018-05-18	8	194	8	N	Nhut	-	-	f	89	64		2018-07-31	152	68			2018-09-30	1258	115			2018-12-25	3800	171			2019-03-07	6400	205			2019-06-08	10000	235				386	0	1
2018-05-28	2018-05-20	2	26	1	N	Kien	-	-	m	93	58		2018-07-31	287	85			2018-09-30	1155	120			2018-12-25	2200	148			2019-03-07	5800	205			2019-06-08	6500	215				384	0	1
2018-05-28	2018-05-20	3	51	2	Y	Kien	Neck upper	981020000220372	m	95	66		2018-07-31	380	95			2018-09-30	1285	122			2018-12-25	4000	179			2019-03-07	6400	205			2019-06-08	8800	230				384	0	1
2018-05-28	2018-05-18	4	97	4	Y	Huu	Neck lateral	981020000221581	m	84	67		2018-07-31	264	84			2018-09-30	1316	120			2018-12-25	4000	179			2019-03-07	4800	205			2019-06-08	10000	245				385	0	1
2018-05-28	2018-05-20	1	3	1	Y	Kien	Neck upper	981020000220378	f	123	60		2018-07-31	383	96			2018-09-30	1580	136			2018-12-25	4000	180			2019-03-07	4600	200			2019-06-08	7200	225				385	0	1
2018-05-28	2018-05-20	1	11	1	Y	Kien	Neck upper	981020000220393	f	83	58		2018-07-31	353	94			2018-09-30	1093	120			2018-12-25	3400	163			2019-03-07	4300	200			2019-06-08	8200	235				385	0	1
2018-05-28	2018-05-20	1	25	1	Y	Kien	Neck	981020000220402	f	95	68		2018-07-31	469	99			2018-09-30	1620	135			2018-12-25	3900	179			2019-03-07	4400	200			2019-06-08	4500	205				385	0	1
2018-05-28	2018-05-20	2	34	2	N	Kien	-	-	f	100	68		2018-07-31	485	100			2018-09-30	1729	141			2018-12-25	3200	168			2019-03-07	5000	200			2019-06-08	8000	240				385	0	1
2018-05-28	2018-05-20	2	40	2	N	Kien	-	-	f	90	67		2018-07-31	425	97			2018-09-30	1118	116			2018-12-25	3400	169			2019-03-07	5300	200			2019-06-08	8000	230				385	0	1
2018-05-28	2018-05-20	3	57	2	Y	Kien	Neck upper	981020000220394	f	90	67		2018-07-31	302	92			2018-09-30	1350	127			2018-12-25	3900	177			2019-03-07	6200	200			2019-06-08	7500	220				386	0	1
2018-05-28	2018-05-18	4	91	4	Y	Huu	Neck upper	981020000220174	f	95	63		2018-07-31	467	93			2018-09-30	1656	131			2018-12-25	4400	177			2019-03-07	6000	200			2019-06-08	6000	215				384	0	1
2018-05-28	2018-05-18	4	95	4	Y	Huu	Neck lateral	981020000221540	f	126	69		2018-07-31	474	100			2018-09-30	1908	142			2018-12-25	4900	193			2019-03-07	3800	200			2019-06-08	3500	205				384	0	1
2018-05-28	2018-05-18	5	102	4	N	Huu	-	-	f	80	65		2018-07-31	294	84			2018-09-30	1020	112			2018-12-25	3000	173			2019-03-07	5000	200			2019-06-08	5000	215				384	0	1
2018-05-28	2018-05-18	5	105	4	Y	Huu	Neck upper	981020000221532	f	89	67		2018-07-31	242	76			2018-09-30	1009	104			2018-12-25	3400	167			2019-03-07	5000	200			2019-06-08	7200	235				384	0	1
2018-05-28	2018-05-19	5	109	5	Y	Huu	Neck upper	981020000221537	f	93	68		2018-07-31	188	73			2018-09-30	943	109			2018-12-25	3700	172			2019-03-07	6000	200			2019-06-08	8800	240				384	0	1
2018-05-28	2018-05-19	5	110	5	N	Huu	-	-	f	100	64		2018-07-31	158	73			2018-09-30	1864	136			2018-12-25	4300	173			2019-03-07	5800	200			2019-06-08	10400	250				386	0	1
2018-05-28	2018-05-19	5	112	5	N	Huu	-	-	f	74	63		2018-07-31	198	73			2018-09-30	1180	107			2018-12-25	3800	175			2019-03-07	5500	200			2019-06-08	7500	230				384	0	1
2018-05-28	2018-05-19	6	135	6	Y	Huu	Neck lateral	981020000221541	f	89	66		2018-07-31	312	93			2018-09-30	1298	125			2018-12-25	4400	175			2019-03-07	5000	200			2019-06-08	5600	210				384	0	1
2018-05-28	2018-05-19	7	159	6	Y	Nhut	Neck upper	981020000221536	f	93	65		2018-07-31	312	82			2018-09-30	1612	128			2018-12-25	3900	174			2019-03-07	5400	200			2019-06-08	5000	210				384	0	1
2018-05-28	2018-05-18	8	181	8	Y	Nhut	Neck upper	981020000221569	f	116	72		2018-07-31	365	94			2018-09-30	1888	140			2018-12-25	3200	165			2019-03-07	5200	200			2019-06-08	5500	215				384	0	1
2018-05-28	2018-05-18	8	189	8	Y	Nhut	Neck upper	981020000221544	f	70	63		2018-07-31	290	80			2018-09-30	1320	128			2018-12-25	4500	188			2019-03-07	5200	200			2019-06-08	7000	220				385	0	1
2018-05-28	2018-05-20	2	38	2	N	Kien	-	-	m	117	70		2018-07-31	461	100			2018-09-30	1438	136			2018-12-25	3200	165			2019-03-07	5800	200			2019-06-08	6800	230				384	0	1
2018-05-28	2018-05-20	2	39	2	Y	Kien	Neck	981020000220411	m	87	62		2018-07-31	381	91			2018-09-30	1608	130			2018-12-25	4000	176			2019-03-07	5700	200			2019-06-08	9000	235				384	0	1
2018-05-28	2018-05-20	2	47	2	Y	Kien	Neck lateral	981020000220376	m	105	68		2018-07-31	399	91			2018-09-30	1543	135			2018-12-25	3900	180			2019-03-07	5000	200			2019-06-08	7000	235				384	0	1
2018-05-28	2018-05-20	3	60	3	N	Kien	-	-	m	105	67		2018-07-31	409	93			2018-09-30	1316	130			2018-12-25	3200	167			2019-03-07	5200	200			2019-06-08	7200	230				384	0	1
2018-05-28	2018-05-20	3	62	3	N	Kien	-	-	m	117	70		2018-07-31	472	99			2018-09-30	1269	130			2018-12-25	3200	175			2019-03-07	4500	200			2019-06-08	5000	210				386	0	1
2018-05-28	2018-05-20	3	67	3	Y	Huu	Neck lateral	981020000220357	m	97	64		2018-07-31	394	94			2018-09-30	1445	133			2018-12-25	3100	165			2019-03-07	5000	200			2019-06-08	8000	230				385	0	1
2018-05-28	2018-05-20	3	75	3	Y	Huu	Neck lateral	981020000220201	m	124	66		2018-07-31	294	82			2018-09-30	980	118			2018-12-25	3200	164			2019-03-07	5100	200			2019-06-08	9200	245				385	0	1
2018-05-28	2018-05-18	4	99	4	Y	Huu	Neck lateral	981020000221524	m	77	64		2018-07-31	222	81			2018-09-30	1058	117			2018-12-25	3800	178			2019-03-07	5000	200			2019-06-08	6500	230				385	0	1
2018-05-28	2018-05-19	6	150	6	N	Nhut	-	-	m	83	60		2018-07-31	291	80			2018-09-30	1383	125			2018-12-25	3800	175			2019-03-07	5800	200			2019-06-08	9400	245				385	0	1
2018-05-28	2018-05-19	7	160	7	N	Nhut	-	-	m	89	65		2018-07-31	329	87			2018-09-30	1440	130			2018-12-25	3000	168			2019-03-07	5000	200			2019-06-08	6300	230				385	0	1
2018-05-28	2018-05-18	8	196	8	N	Nhut	-	-	m	75	63		2018-07-31	235	79			2018-09-30	1145	113			2018-12-25	3700	174			2019-03-07	6000	200			2019-06-08	8000	230				385	0	1
2018-05-28	2018-05-20	1	20	1	N	Kien	-	-	f	101	64		2018-07-31	414	89			2018-09-30	1255	126			2018-12-25	4000	179			2019-03-07	4800	195			2019-06-08	6300	215				384	0	1
2018-05-28	2018-05-20	2	29	2	Y	Kien	Neck	981020000220377	f	116	72		2018-07-31	382	99			2018-09-30	1626	137			2018-12-25	3600	176			2019-03-07	5200	195			2019-06-08	10800	240				386	0	1
2018-05-28	2018-05-19	5	117	5	Y	Huu	Neck lateral	981020000221522	f	108	69		2018-07-31	194	74			2018-09-30	1233	122			2018-12-25	3900	170			2019-03-07	6400	195			2019-06-08	9200	245				384	0	1
2018-05-28	2018-05-19	5	121	5	Y	Huu	Neck lateral	981020000221521	f	100	69		2018-07-31	140	70			2018-09-30	735	99			2018-12-25	3000	161			2019-03-07	5600	195			2019-06-08	8500	240				385	0	1
2018-05-28	2018-05-19	6	130	5	N	Huu	-	-	f	90	62		2018-07-31	450	88			2018-09-30	1672	138			2018-12-25	3800	177			2019-03-07	5100	195			2019-06-08	7500	225				385	0	1
2018-05-28	2018-05-19	6	147	6	Y	Nhut	Neck lateral	981020000221547	f	97	70		2018-07-31	447	96			2018-09-30	1425	130			2018-12-25	3200	165			2019-03-07	4800	195			2019-06-08	8000	240				385	0	1
2018-05-28	2018-05-19	7	169	7	Y	Nhut	Neck upper	981020000221549	f	127	73		2018-07-31	416	94			2018-09-30	1922	140			2018-12-25	3300	170			2019-03-07	4800	195			2019-06-08	5500	220				385	0	1
2018-05-28	2018-05-19	7	175	7	Y	Nhut	Neck lateral	981020000221527	f	106	67		2018-07-31	354	89			2018-09-30	1652	122			2018-12-25	4000	176			2019-03-07	4500	195			2019-06-08	5000	210				385	0	1
2018-05-28	2018-05-18	8	188	8	N	Nhut	-	-	f	125	68		2018-07-31	305	84			2018-09-30	1520	130			2018-12-25	3100	165			2019-03-07	5700	195			2019-06-08	8200	230				386	0	1
2018-05-28	2018-05-20	1	7	1	Y	Kien	Neck upper	981020000220413	m	123	69		2018-07-31	321	86			2018-09-30	1018	119			2018-12-25	3400	170			2019-03-07	4400	195			2019-06-08	9500	240				384	0	1
2018-05-28	2018-05-20	1	15	1	Y	Kien	Neck upper	981020000220375	m	95	66		2018-07-31	153	84			2018-09-30	1425	127			2018-12-25	3200	166			2019-03-07	4900	195			2019-06-08	8300	235				384	0	1
2018-05-28	2018-05-20	2	27	1	Y	Kien	Neck	981020000220334	m	92	60		2018-07-31	362	84			2018-09-30	1145	132			2018-12-25	3900	175			2019-03-07	4800	195			2019-06-08	6800	230				384	0	1
2018-05-28	2018-05-20	3	70	3	N	Huu	-	-	m	105	66		2018-07-31	438	97			2018-09-30	1108	116			2018-12-25	3200	164			2019-03-07	4000	195			2019-06-08	5700	220				384	0	1
2018-05-28	2018-05-18	4	87	4	Y	Huu	Neck lateral	981020000220412	m	95	65		2018-07-31	300	90			2018-09-30	1509	136			2018-12-25	3000	168			2019-03-07	5000	195			2019-06-08	10000	250				386	0	1
2018-05-28	2018-05-18	5	103	4	Y	Huu	Neck upper	981020000221550	m	81	64		2018-07-31	283	82			2018-09-30	1120	116			2018-12-25	2800	160			2019-03-07	4500	195			2019-06-08	5200	225				386	0	1
2018-05-28	2018-05-19	5	111	5	Y	Huu	Neck lateral	981020000221557	m	114	70		2018-07-31	308	83			2018-09-30	1180	122			2018-12-25	3000	165			2019-03-07	4500	195			2019-06-08	6300	235				385	0	1
2018-05-28	2018-05-19	5	118	5	N	Huu	-	-	m	126	70		2018-07-31	305	90			2018-09-30	1650	123			2018-12-25	3200	162			2019-03-07	4500	195			2019-06-08	7400	235				385	0	1
2018-05-28	2018-05-19	7	172	7	N	Nhut	-	-	m	95	65		2018-07-31	370	86			2018-09-30	1528	128			2018-12-25	3700	167			2019-03-07	4400	195			2019-06-08	6800	220				385	0	1
2018-05-28	2018-05-19	8	179	7	Y	Nhut	Neck upper	981020000221564	m	84	64		2018-07-31	278	80			2018-09-30	1222	113			2018-12-25	3400	169			2019-03-07	5100	195			2019-06-08	6000	215				385	0	1
2018-05-28	2018-05-20	1	6	1	N	Kien	-	-	f	89	63		2018-07-31	399	90			2018-09-30	1230	127			2018-12-25	3200	162			2019-03-07	4200	190			2019-06-08	7000	220				384	0	1
2018-05-28	2018-05-20	1	19	1	Y	Kien	Neck upper	981020000220392	f	105	62		2018-07-31	456	94			2018-09-30	1859	138			2018-12-25	4500	180			2019-03-07	5000	190			2019-06-08	7000	220				384	0	1
2018-05-28	2018-05-20	2	28	2	N	Kien	-	-	f	96	66		2018-07-31	358	90			2018-09-30	1006	118			2018-12-25	3200	156			2019-03-07	4500	190			2019-06-08	9500	240				384	0	1
2018-05-28	2018-05-20	2	32	2	N	Kien	-	-	f	100	64		2018-07-31	402	90			2018-09-30	1460	131			2018-12-25	3200	166			2019-03-07	4800	190			2019-06-08	8200	230				384	0	1
2018-05-28	2018-05-20	3	55	2	Y	Kien	Neck lateral	981020000220361	f	92	64		2018-07-31	375	98			2018-09-30	1430	128			2018-12-25	3600	172			2019-03-07	3900	190			2019-06-08	4200	200				384	0	1
2018-05-28	2018-05-18	4	93	4	Y	Huu	Neck upper	981020000220155	f	102	66		2018-07-31	337	92			2018-09-30	1365	127			2018-12-25	3000	165			2019-03-07	5600	190			2019-06-08	7000	235				386	0	1
2018-05-28	2018-05-20	3	64	3	N	Kien	-	-	m	85	64		2018-07-31	438	90			2018-09-30	1540	130			2018-12-25	3000	169			2019-03-07	4200	190			2019-06-08	8200	235				384	0	1
2018-05-28	2018-05-18	4	83	4	Y	Huu	Neck lateral	981020000220380	m	93	63		2018-07-31	256	84			2018-09-30	1208	112			2018-12-25	3100	188			2019-03-07	4200	190			2019-06-08	5700	215				386	0	1
2018-05-28	2018-05-18	4	92	4	N	Huu	-	-	m	88	66		2018-07-31	325	88			2018-09-30	1280	128			2018-12-25	4800	179			2019-03-07	3800	190			2019-06-08	4500	200				386	0	1
2018-05-28	2018-05-19	5	106	5	N	Huu	-	-	m	103	63		2018-07-31	473	90			2018-09-30	1770	128			2018-12-25	4100	188			2019-03-07	3200	190			2019-06-08	2500	195				385	0	1
2018-05-28	2018-05-19	6	142	6	N	Nhut	-	-	m	85	65		2018-07-31	369	86			2018-09-30	1419	128			2018-12-25	2800	166			2019-03-07	4500	190			2019-06-08	7000	225				385	0	1
2018-05-28	2018-05-19	7	151	6	Y	Nhut	Neck lateral	981020000220167	m	84	60		2018-07-31	327	83			2018-09-30	1270	120			2018-12-25	3300	173			2019-03-07	4800	190			2019-06-08	8800	240				385	0	1
2018-05-28	2018-05-19	7	164	7	N	Nhut	-	-	m	97	65		2018-07-31	375	86			2018-09-30	1524	135			2018-12-25	3900	177			2019-03-07	4000	190			2019-06-08	4000	195				385	0	1
2018-05-28	2018-05-19	7	165	7	Y	Nhut	Neck lateral	981020000221554	m	123	67		2018-07-31	415	90			2018-09-30	1548	131			2018-12-25	3200	174			2019-03-07	3400	190			2019-06-08	7200	245				385	0	1
2018-05-28	2018-05-19	7	174	7	N	Nhut	-	-	m	85	62		2018-07-31	362	86			2018-09-30	1222	120			2018-12-25	3800	171			2019-03-07	4500	190			2019-06-08	7300	220				385	0	1
2018-05-28	2018-05-20	1	5	1	Y	Kien	Neck upper	981020000220383	f	107	65		2018-07-31	190	68			2018-09-30	776	100			2018-12-25	2900	158			2019-03-07	4200	185			2019-06-08	3600	190				384	0	1
2018-05-28	2018-05-20	1	17	1	Y	Kien	Neck upper	981020000220396	f	102	61		2018-07-31	378	95			2018-09-30	1900	128			2018-12-25	2900	165			2019-03-07	3800	185			2019-06-08	4200	185				384	0	1
2018-05-28	2018-05-20	2	49	2	Y	Kien	Neck upper	981020000220381	f	111	69		2018-07-31	362	96			2018-09-30	1800	144			2018-12-25	2900	171			2019-03-07	4000	185			2019-06-08	5300	205				384	0	1
2018-05-28	2018-05-20	3	56	2	N	Kien	-	-	f	95	64		2018-07-31	424	94			2018-09-30	1680	132			2018-12-25	2300	147			2019-03-07	3600	185			2019-06-08	3800	190				384	0	1
2018-05-28	2018-05-19	7	156	6	N	Nhut	-	-	f	92	68		2018-07-31	291	87			2018-09-30	982	125			2018-12-25	2200	145			2019-03-07	4000	185			2019-06-08	9600	235				385	0	1
2018-05-28	2018-05-20	1	10	1	N	Kien	-	-	m	99	65		2018-07-31	428	91			2018-09-30	626	101			2018-12-25	2400	159			2019-03-07	3000	185			2019-06-08	4500	190				384	0	1
2018-05-28	2018-05-20	2	33	2	Y	Kien	Neck	981020000220366	m	110	69		2018-07-31	472	100			2018-09-30	1841	141			2018-12-25	2300	158			2019-03-07	4000	185			2019-06-08	3400	190				384	0	1
2018-05-28	2018-05-20	2	45	2	Y	Kien	Neck lateral	981020000220369	m	92	63		2018-07-31	435	92			2018-09-30	1420	136			2018-12-25	2900	155			2019-03-07	3600	185			2019-06-08	4000	190				384	0	1
2018-05-28	2018-05-20	2	46	2	N	Kien	-	-	m	78	62		2018-07-31	337	82			2018-09-30	1278	129			2018-12-25	2800	158			2019-03-07	4300	185			2019-06-08	6000	220				384	0	1
2018-05-28	2018-05-20	3	58	3	N	Kien	-	-	m	81	70		2018-07-31	402	95			2018-09-30	1100	122			2018-12-25	1800	137			2019-03-07	3900	185			2019-06-08	9200	245				384	0	1
2018-05-28	2018-05-18	4	100	4	N	Huu	-	-	m	97	67		2018-07-31	323	87			2018-09-30	1250	122			2018-12-25	3000	169			2019-03-07	3600	185			2019-06-08	7700	230				386	0	1
2018-05-28	2018-05-20	1	8	1	N	Kien	-	-	f	131	69		2018-07-31	462	94			2018-09-30	1667	136			2018-12-25	2200	146			2019-03-07	3200	180			2019-06-08	7800	230				384	0	1
2018-05-28	2018-05-20	2	31	2	Y	Kien	Neck lateral	981020000220391	f	116	64		2018-07-31	235	80			2018-09-30	1278	117			2018-12-25	3000	161			2019-03-07	3800	180			2019-06-08	3100	180				384	0	1
2018-05-28	2018-05-20	3	65	3	Y	Kien	Neck upper	981020000220171	f	117	70		2018-07-31	360	95			2018-09-30	1760	136			2018-12-25	2200	151			2019-03-07	3200	180			2019-06-08	4500	205				384	0	1
2018-05-28	2018-05-20	4	76	3	N	Huu	-	-	f	116	68		2018-07-31	305	85			2018-09-30	1288	122			2018-12-25	2600	151			2019-03-07	2500	180			2019-06-08	4200	200				384	0	1
2018-05-28	2018-05-18	4	96	4	N	Huu	-	-	f	84	75		2018-07-31	251	80			2018-09-30	991	115			2018-12-25	2200	163			2019-03-07	3300	180			2019-06-08	3600	200				386	0	1
2018-05-28	2018-05-19	5	116	5	N	Huu	-	-	f	96	65		2018-07-31	166	72			2018-09-30	1587	128			2018-12-25	3000	162			2019-03-07	4300	180			2019-06-08	3800	200				385	0	1
2018-05-28	2018-05-19	5	125	5	Y	Huu	Neck lateral	981020000220150	f	115	72		2018-07-31	383	99			2018-09-30	2018	137			2018-12-25	3000	171			2019-03-07	2600	180			2019-06-08	2000	180				385	0	1
2018-05-28	2018-05-19	6	133	6	Y	Huu	Neck lateral	981020000221582	f	115	71		2018-07-31	384	100			2018-09-30	1600	130			2018-12-25	4200	178			2019-03-07	3500	180			2019-06-08	3500	185				385	0	1
2018-05-28	2018-05-19	7	166	7	N	Nhut	-	-	f	92	67		2018-07-31	265	80			2018-09-30	1235	120			2018-12-25	3400	160			2019-03-07	4200	180			2019-06-08	8300	220				385	0	1
2018-05-28	2018-05-20	3	66	3	N	Kien	-	-	m	127	70		2018-07-31	395	100			2018-09-30	1850	135			2018-12-25	2300	158			2019-03-07	3900	180			2019-06-08	4800	210				384	0	1
2018-05-28	2018-05-20	4	78	3	N	Huu	-	-	m	94	56		2018-07-31	347	92			2018-09-30	1301	122			2018-12-25	2600	150			2019-03-07	2900	180			2019-06-08	3500	195				384	0	1
2018-05-28	2018-05-18	4	84	4	N	Huu	-	-	m	95	63		2018-07-31	282	86			2018-09-30	960	120			2018-12-25	3100	121			2019-03-07	3600	180			2019-06-08	4600	210				386	0	1
2018-05-28	2018-05-19	6	149	6	Y	Nhut	Neck lateral	981020000220145	m	94	62		2018-07-31	354	87			2018-09-30	1426	126			2018-12-25	4000	176			2019-03-07	3500	180			2019-06-08	3000	190				385	0	1
2018-05-28	2018-05-19	7	153	6	Y	Nhut	Neck upper	981020000220194	m	105	70		2018-07-31	277	84			2018-09-30	1128	114			2018-12-25	2200	152			2019-03-07	3200	180			2019-06-08	6000	220				385	0	1
2018-05-28	2018-05-19	5	113	5	Y	Huu	Neck upper	981020000221546	f	115	71		2018-07-31	356	100			2018-09-30	1920	137			2018-12-25	3000	165			2019-03-07	2400	175			2019-06-08	1800	180				385	0	1
2018-05-28	2018-05-19	5	115	5	Y	Huu	Neck upper	981020000221559	f	114	73		2018-07-31	332	86			2018-09-30	1013	100			2018-12-25	2000	158			2019-03-07	3700	175			2019-06-08	6500	225				385	0	1
2018-05-28	2018-05-20	3	53	2	Y	Kien	Neck upper	981020000220363	m	128	70		2018-07-31	470	100			2018-09-30	1460	133			2018-12-25	2900	170			2019-03-07	3000	175			2019-06-08	3000	185				384	0	1
2018-05-28	2018-05-20	3	73	3	Y	Huu	Neck upper	981020000221542	m	111	66		2018-07-31	520	100			2018-09-30	1250	124			2018-12-25	2800	171			2019-03-07	3000	175			2019-06-08	3500	190				384	0	1
2018-05-28	2018-05-18	4	94	4	N	Huu	-	-	m	94	63		2018-07-31	301	85			2018-09-30	1255	123			2018-12-25	2600	162			2019-03-07	2700	175			2019-06-08	6000	210				386	0	1
2018-05-28	2018-05-19	5	119	5	Y	Huu	Neck upper	981020000221530	m	114	68		2018-07-31	249	80			2018-09-30	926	100			2018-12-25	2800	161			2019-03-07	2800	175			2019-06-08	6500	225				385	0	1
2018-05-28	2018-05-20	2	42	2	N	Kien	-	-	f	78	62		2018-07-31	337	82			2018-09-30	1342	126			2018-12-25	1900	141			2019-03-07	3200	170			2019-06-08	4600	190				384	0	1
2018-05-28	2018-05-18	4	86	4	N	Huu	-	-	f	97	66		2018-07-31	298	85			2018-09-30	1266	120			2018-12-25	3200	159			2019-03-07	2800	170			2019-06-08	3000	180				386	0	1
2018-05-28	2018-05-20	2	37	2	Y	Kien	Neck	981020000220365	m	88	61		2018-07-31	335	90			2018-09-30	1220	125			2018-12-25	1900	137			2019-03-07	3800	170			2019-06-08	5200	205				384	0	1
2018-05-28	2018-05-19	6	146	6	N	Nhut	-	-	m	99	66		2018-07-31	346	84			2018-09-30	1580	125			2018-12-25	2700	160			2019-03-07	3000	170			2019-06-08	6200	215				385	0	1
2018-05-28	2018-05-18	8	187	8	Y	Nhut	Neck upper	981020000221562	m	140	75		2018-07-31	457	99			2018-09-30	1980	137			2018-12-25	2800	163			2019-03-07	3200	170			2019-06-08	5200	220				386	0	1
2018-05-28	2018-05-20	3	71	3	Y	Huu	Neck lateral	981020000220353	m	111	67		2018-07-31	233	82			2018-09-30	1345	121			2018-12-25	2800	163			2019-03-07	2600	165			2019-06-08	2500	180				384	0	1
2018-05-28	2018-05-18	4	89	4	Y	Huu	Neck upper	981020000221548	m	98	63		2018-07-31	314	88			2018-09-30	1052	114			2018-12-25	1600	135			2019-03-07	3000	165			2019-06-08	6000	215				386	0	1
2018-05-28	2018-05-19	6	136	6	N	Nhut	-	-	m	91	66		2018-07-31	413	87			2018-09-30	1360	125			2018-12-25	2200	148			2019-03-07	1800	165			2019-06-08	5400	215				385	0	1
2018-05-28	2018-05-19	6	141	6	Y	Nhut	Neck lateral	981020000221523	m	97	66		2018-07-31	379	90			2018-09-30	1386	120			2018-12-25	2400	155			2019-03-07	2600	165			2019-06-08	4000	200				385	0	1
2018-05-28	2018-05-19	7	171	7	Y	Nhut	Neck upper	981020000221580	m	137	71		2018-07-31	420	98			2018-09-30	1402	135			2018-12-25	2800	165			2019-03-07	2200	165			2019-06-08	2500	170				385	0	1
2018-05-28	2018-05-20	2	44	2	N	Kien	-	-	m	109	69		2018-07-31	179	80			2018-09-30	945	112			2018-12-25	2000	147			2019-03-07	2800	160			2019-06-08	3800	190				384	0	1
2018-05-28	2018-05-19	6	148	6	N	Nhut	-	-	m	100	62		2018-07-31	387	85			2018-09-30	1265	118			2018-12-25	1800	140			2019-03-07	2100	160			2019-06-08	2500	180				385	0	1
2018-05-28	2018-05-20	2	50	2	N	Kien	-	-	f	114	70		2018-07-31	568	103			2018-09-30	1766	140			2018-12-25	2000	153			2019-03-07	1800	155			2019-06-08	1400	160				384	0	1
2018-05-28	2018-05-19	7	155	6	Y	Nhut	Neck lateral	981020000220198	f	90	66		2018-07-31	348	88			2018-09-30	1233	120			2018-12-25	1500	142			2019-03-07	1800	150			2019-06-08	5000	190				385	0	1
2018-05-28	2018-05-19	6	134	6	N	Huu	-	-	m	94	67		2018-07-31	373	90			2018-09-30	1295	123			2018-12-25	1800	149			2019-03-07	1600	150			2019-06-08	3300	185				385	0	1
2018-05-28	2018-05-18	8	192	8	N	Nhut	-	-	m	81	65		2018-07-31	227	80			2018-09-30	640	95			2018-12-25	1700	130			2019-03-07	2400	150			2019-06-08	4500	190				386	0	1
2018-05-28	2018-05-19	7	154	6	N	Nhut	-	-	f	78	65		2018-07-31	291	80			2018-09-30	780	98			2018-12-25	1700	145			2019-03-07	1600	145			2019-06-08	3000	160				385	0	1
2018-05-28	2018-05-20	2	36	2	N	Kien	-	-	m	103	64		2018-07-31	275	84			2018-09-30	1105	123			2018-12-25	1800	138			2019-03-07	1100	140			2019-06-08	1200	140				384	0	1
2018-05-28	2018-05-20	1	14	1	N	Kien	-	-	f	93	61		2018-07-31	367	91			2018-09-30	1235	122			2018-12-25	2800	160			2019-03-07				2018-12-30	2019-06-08					2018-12-30	224	1	0
2018-05-28	2018-05-20	1	23	1	Y	Kien	Neck	981020000220395	f	124	73		2018-07-31	375	96			2018-09-30	1382	130			2018-12-25	1800	139			2019-03-07				2019-02-27	2019-06-08					2019-02-27	283	1	0
2018-05-28	2018-05-20	2	41	2	Y	Kien	Neck	981020000220379	f	101	68		2018-07-31	462	100			2018-09-30	1647	140			2018-12-25	3200	161			2019-03-07				2019-02-06	2019-06-08					2019-02-06	262	1	0
2018-05-28	2018-05-20	2	48	2	N	Kien	-	-	f	101	68		2018-07-31	92	68			2018-09-30				2018-08-19	2018-12-25					2019-03-07					2019-06-08					2018-08-19	91	1	0
2018-05-28	2018-05-20	3	59	3	Y	Kien	Neck upper	981020000220387	f	141	69		2018-07-31	109	69			2018-09-30				2018-09-05	2018-12-25					2019-03-07					2019-06-08					2018-09-05	108	1	0
2018-05-28	2018-05-20	3	63	3	Y	Kien	Neck lateral	981020000220210	f	130	72		2018-07-31	345	100			2018-09-30	1347	131			2018-12-25				2018-11-21	2019-03-07					2019-06-08					2018-11-21	185	1	0
2018-05-28	2018-05-20	3	72	3	N	Huu	-	-	f	98	62		2018-07-31				2018-06-30	2018-09-30					2018-12-25					2019-03-07					2019-06-08					2018-06-30	41	1	0
2018-05-28	2018-05-20	3	74	3	N	Huu	-	-	f	103	64		2018-07-31	291	88			2018-09-30	1081	115			2018-12-25				2018-12-19	2019-03-07					2019-06-08					2018-12-19	213	1	0
2018-05-28	2018-05-18	4	81	4	Y	Huu	Neck lateral	981020000221543	f	82	64		2018-07-31	332	83			2018-09-30	1110	115			2018-12-25	1100	152			2019-03-07				2019-02-28	2019-06-08					2019-02-28	286	1	0
2018-05-28	2018-05-19	5	107	5	Y	Huu	Neck upper	981020000220370	f	93	63		2018-07-31	79	63			2018-09-30				2018-08-05	2018-12-25					2019-03-07					2019-06-08					2018-08-05	78	1	0
2018-05-28	2018-05-19	7	152	6	N	Nhut	-	-	f	97	68		2018-07-31	199	80			2018-09-30	992	118			2018-12-25	1900	152			2019-03-07				2019-02-06	2019-06-08					2019-02-06	263	1	0
2018-05-28	2018-05-19	8	178	7	N	Nhut	-	-	f	105	68		2018-07-31				2018-06-18	2018-09-30					2018-12-25					2019-03-07					2019-06-08					2018-06-18	30	1	0
2018-05-28	2018-05-18	8	186	8	N	Nhut	-	-	f	89	68		2018-07-31	312	84			2018-09-30				2018-09-29	2018-12-25					2019-03-07					2019-06-08					2018-09-29	134	1	0
2018-05-28	2018-05-18	8	199	8	Y	Nhut	Neck lateral	981020000220445	f	114	73		2018-07-31	366	91			2018-09-30				2018-08-31	2018-12-25					2019-03-07					2019-06-08					2018-08-31	105	1	0
2018-05-28	2018-05-20	1	1	1	Y	Kien	Neck upper	981020000220356	m	99	64		2018-07-31				2018-07-14	2018-09-30					2018-12-25					2019-03-07					2019-06-08					2018-07-14	55	1	0
2018-05-28	2018-05-20	1	12	1	N	Kien	-	-	m	89	58		2018-07-31				2018-07-19	2018-09-30					2018-12-25					2019-03-07					2019-06-08					2018-07-19	60	1	0
2018-05-28	2018-05-20	1	16	1	N	Kien	-	-	m	97	62		2018-07-31	122	68			2018-09-30				2018-08-24	2018-12-25					2019-03-07					2019-06-08					2018-08-24	96	1	0
2018-05-28	2018-05-20	1	21	1	Y	Kien	Neck	981020000220403	m	121	72		2018-07-31	387	94			2018-09-30	1379	128			2018-12-25	3100	161			2019-03-07				2019-01-03	2019-06-08					2019-01-03	228	1	0
2018-05-28	2018-05-20	1	24	1	N	Kien	-	-	m	85	59		2018-07-31	295	77			2018-09-30	892	108			2018-12-25				2018-11-12	2019-03-07					2019-06-08					2018-11-12	176	1	0
2018-05-28	2018-05-20	3	61	3	Y	Kien	Neck upper	981020000221552	m	111	69		2018-07-31	191	75			2018-09-30				2018-08-07	2018-12-25					2019-03-07					2019-06-08					2018-08-07	79	1	0
2018-05-28	2018-05-19	5	124	5	N	Huu	-	-	m	109	74		2018-07-31	110	74			2018-09-30				2018-08-22	2018-12-25					2019-03-07					2019-06-08					2018-08-22	95	1	0
2018-05-28	2018-05-19	6	126	5	N	Huu	-	-	m	96	62		2018-07-31	335	82			2018-09-30	1633	130			2018-12-25	3000	160			2019-03-07				2019-02-03	2019-06-08					2019-02-03	260	1	0
2018-05-28	2018-05-19	6	139	6	Y	Nhut	Neck lateral	981020000220406	m	92	62		2018-07-31	341	93			2018-09-30	1362	122			2018-12-25	3000	165			2019-03-07				2019-01-12	2019-06-08					2019-01-12	238	1	0
2018-05-28	2018-05-19	6	143	6	Y	Nhut	Neck upper	981020000221538	m	90	68		2018-07-31	461	97			2018-09-30	1533	133			2018-12-25				2018-10-18	2019-03-07					2019-06-08					2018-10-18	152	1	0
2018-05-28	2018-05-19	6	144	6	N	Nhut	-	-	m	89	66		2018-07-31	130	72			2018-09-30	1212	126			2018-12-25	3100	166			2019-03-07				2019-01-12	2019-06-08					2019-01-12	238	1	0
2018-05-28	2018-05-18	8	183	8	Y	Nhut	Neck upper	981020000221555	m	88	63		2018-07-31	416	91			2018-09-30	1655	133			2018-12-25				2018-11-21	2019-03-07					2019-06-08					2018-11-21	187	1	0
2018-05-28	2018-05-18	8	190	8	N	Nhut	-	-	m	114	72		2018-07-31	295	81			2018-09-30				2018-09-13	2018-12-25					2019-03-07					2019-06-08					2018-09-13	118	1	0

## Sheet: Summary_p5
Parameters		%female	weight @ tagging	weight @ t1	weight @ t2	weight @ t3	weight @ t4	weight @ t5	weight diff during p1	weight diff during p2	weight diff during p3	weight diff during p4	weight diff during p5	weight diff during total	weight % growth during p1	weight % growth during p2	weight % growth during p3	weight % growth during p4	weight % growth during p5	weight % growth during total	length @ tagging	length @ t1	length @ t2	length @ t3	length @ t4	length @ t5	length diff during p1	length diff during p2	length diff during p3	length diff during p4	length diff during p5	length diff during total	length % growth during p1	length % growth during p2	length % growth during p3	length % growth during p4	length % growth during p5	length % growth during total	mortality during p1	mortality during p2	mortality during p3	mortality during p4	mortality during p5	mortality during total
Clutch_id
1		0.555556	104.556	345.36	1291.04	2972.73	4080	7006.25	239.96	936.375	1669.18	931.579	2468.75	6903.25	0.125819	0.147586	0.0665667	0.0237159	0.030315	0.0778121	64.0741	88.28	124.333	160.727	187.5	220.312	23.96	35.2083	35.7273	24.4211	25.3125	156.688	0.0344099	0.0381087	0.0204734	0.0134233	0.0089752	0.0230811	0.0740741	0.037037	0.037037	0.111111	0.148148	0.407407
2		0.6	100.5	373.3	1453.1	3031.03	4250	6100	272.8	1070.1	1577.93	1225	1680	5999.24	0.139407	0.153934	0.0581725	0.0279743	0.0189381	0.0739291	66.2667	92.2667	130.759	162.069	184.107	211.4	26	37.6552	31.3103	22	24.4	145.24	0.0358925	0.0390289	0.0173222	0.0121536	0.0088222	0.0214568	0	0.0333333	0	0.0333333	0.1	0.166667
3		0.333333	109	351.6	1353.17	2725	3712.5	5964.29	242.05	979.167	1354.44	987.5	1964.29	5857.64	0.123151	0.147982	0.0550402	0.0254195	0.0270442	0.073676	66.5238	90.55	126.056	158.875	183.312	217.143	23.8	33.4444	32.4375	24.4375	28.5714	150.714	0.033031	0.0354373	0.018447	0.0136804	0.0104213	0.0219908	0.047619	0.0952381	0.0952381	0	0.0952381	0.333333
4		0.481482	98.9259	341.037	1404.85	3574.07	4992.31	7280	242.111	1063.82	2169.22	1323.08	2136	7180.76	0.13361	0.162658	0.0725508	0.0274141	0.024299	0.0787258	66.4444	88.7407	125.889	170.63	196.731	229.2	22.2963	37.1482	44.7407	25.3846	31	162.52	0.0314914	0.0400156	0.0246059	0.0135588	0.0108306	0.0229193	0	0	0	0.037037	0.037037	0.0740741
5		0.653846	105.538	302.308	1429.79	3708.33	5421.74	7291.3	196.769	1110.17	2278.54	1682.61	1869.57	7184.96	0.105058	0.175535	0.0783327	0.0330608	0.0185779	0.0768906	68.3846	84.3077	122.083	172.417	200	231.522	15.9231	36.4583	50.3333	27.0435	31.5217	162.87	0.0222749	0.0408409	0.0283861	0.0139615	0.0108229	0.0225578	0	0.0769231	0	0	0	0.115385
6		0.464286	93.7143	346.714	1353.61	3007.41	3875	6604.76	253	1006.89	1660.44	825	2452.38	6509.14	0.140481	0.157698	0.0614183	0.0172784	0.0354913	0.0768394	66	87.6429	124.214	162.259	180.417	217.381	21.6429	36.5714	38.3704	18	32.8571	151.095	0.0308934	0.0400523	0.0217823	0.0097809	0.0122526	0.0219697	0	0	0.0357143	0.107143	0.107143	0.25
7		0.5	109.3	398.368	1559.37	3905.26	5215.79	7893.75	288.842	1161	2345.89	1310.53	2412.5	7786.25	0.140597	0.157423	0.0738914	0.0241204	0.0255013	0.0786573	67.7	90.2105	130.79	173.895	198.421	229.688	22.5263	40.5789	43.1053	24.5263	28.75	162.25	0.0313888	0.0426048	0.0232547	0.0125473	0.0098677	0.0227283	0.05	0	0	0	0.15	0.2
8		0.571429	103.619	335.857	1586.67	4370.59	6476.47	9343.75	232.238	1248.89	2787.94	2105.88	3031.25	9239	0.127279	0.178158	0.0816483	0.0379795	0.0292235	0.0831027	68.1905	87.5714	174.444	177.765	208.529	239.688	19.3809	86.5	48.5294	30.7647	32.5	171.688	0.0271405	0.0586156	0.0260104	0.0153921	0.0110924	0.0234082	0	0.142857	0	0	0.047619	0.238095
Pen_id
1		0.6	105.52	347.174	1303.86	2965	3944.44	7057.14	240.652	946.455	1646.1	776.471	2628.57	6952.64	0.124887	0.147733	0.0656131	0.0197745	0.0321604	0.0775586	64.48	88.6087	124.182	160.65	186.111	220	23.8261	34.6364	35.75	22.7647	25.7143	155.714	0.0339845	0.0374168	0.0205196	0.0125204	0.0091138	0.0228492	0.08	0.04	0.04	0.12	0.16	0.44
2		0.52	99.76	366.36	1419.96	2887.5	4143.48	6285.71	266.6	1042.17	1467.54	1269.57	1904.76	6185.95	0.137288	0.152933	0.0563491	0.0298438	0.0216322	0.0745763	65.56	90.64	130.417	159.333	182.609	212.619	25.08	38.8333	28.9167	23.3478	26.4286	147.238	0.035115	0.0406333	0.0161926	0.0129946	0.0095537	0.0217814	0	0.04	0	0.04	0.08	0.16
3		0.44	107.28	365.667	1407.18	2960	4115	5976.47	258	1021.91	1533.5	1155	1641.18	5871.23	0.130133	0.148788	0.0578005	0.0284666	0.021043	0.0739746	66.96	92.2917	127.909	163.25	185.9	215.588	25.125	33.7727	34.85	22.65	25.2941	148.588	0.0343958	0.0351999	0.0193667	0.0124989	0.0091927	0.02168	0.04	0.08	0.08	0	0.12	0.32
4		0.48	100.12	338.72	1397.24	3448	4637.5	7078.26	238.6	1058.52	2050.76	1091.67	2291.3	6977.7	0.132113	0.162585	0.0695789	0.0228678	0.0271604	0.0776479	65.92	89.32	126.36	168.32	193.75	226.522	23.4	37.04	41.96	24.75	31.3043	160.391	0.0332025	0.0397567	0.0230498	0.013465	0.0110071	0.0228426	0	0	0	0.04	0.04	0.08
5		0.6	104.36	284.72	1377.04	3556.52	5300	6913.04	180.36	1075.78	2179.48	1743.48	1613.04	6808.39	0.100087	0.177327	0.0788087	0.0354736	0.0166588	0.0763492	68.6	83.36	120.087	171.261	198.696	229.565	14.76	35.4348	51.1739	27.4348	30.8696	160.957	0.0205956	0.0402044	0.0292657	0.0143078	0.0107165	0.0224171	0	0.08	0	0	0	0.08
6		0.44	97.04	371.68	1469.48	3504.17	4509.52	7047.37	274.64	1097.8	2037.33	938.095	2263.16	6947.95	0.144803	0.159838	0.0663729	0.0172545	0.0288282	0.0773724	66.28	89.16	127.56	167.792	188.571	224.21	22.88	38.4	40.4583	20.1905	31.0526	157.368	0.0323657	0.0412687	0.0221862	0.0105113	0.01117	0.0224201	0	0	0.04	0.08	0.08	0.24
7		0.56	103.72	367.68	1404.04	3408	4679.17	7366.67	263.96	1036.36	2003.96	1208.33	2447.62	7263	0.137235	0.154095	0.0697706	0.0239197	0.0312287	0.0781005	67	88.24	126.24	168.12	191.25	224.048	21.24	38	41.88	22.4583	30.4762	156.952	0.0300818	0.0409459	0.0233132	0.0117885	0.0109	0.0223275	0	0	0	0.04	0.12	0.16
8		0.56	103.32	344.708	1602.57	4350	6395	9416.67	241.458	1254.95	2750.05	2045	3061.11	9313.44	0.130151	0.17631	0.0805639	0.0369666	0.0288422	0.0834161	68.04	87.9167	168.333	177.55	208	239.722	19.875	80.0476	47.95	30.45	32.2222	172.111	0.0278024	0.0563909	0.0257337	0.0152541	0.0109524	0.0235141	0.04	0.12	0	0	0.08	0.28
Sex
Male		0	101.474	352.344	1384.66	3224.42	4424.39	6760.26	250.71	1024.55	1838.89	1191.46	2185.9	6658.6	0.132661	0.155429	0.0670151	0.0262258	0.0281414	0.076728	66.0211	88.4193	134.933	165.605	189.793	223.141	22.2903	45.8876	39.7326	24.061	31.2821	156.885	0.0316305	0.0425466	0.0222027	0.013021	0.0112347	0.0225101	0.0210526	0.0421053	0.0210526	0.0315789	0.0421053	0.178947
Female		1	103.695	344.612	1454.92	3524.21	4987.91	7500	240.874	1102.5	2063.8	1374.44	2224.36	7396.64	0.126892	0.163823	0.0690307	0.0275763	0.0230483	0.0779272	67.1333	88.9126	127.225	168.295	193.791	225.321	21.7379	37.602	40.9684	24.4556	27.5	158.154	0.0302599	0.0402481	0.0226973	0.0128329	0.0095655	0.0224251	0.0190476	0.047619	0.0190476	0.047619	0.12381	0.257143
Tagger_id
No tagger		0.51	101.34	348.897	1394.86	3282.02	4623.26	7157.14	247.433	1037.12	1878.21	1295.29	2294.8	7055.75	0.130721	0.157225	0.067005	0.0269129	0.027782	0.0776008	66.52	87.7835	134.772	164.775	190.849	223.896	21.1443	46.2935	38.4832	25.6	29.7403	157.182	0.0298896	0.0433452	0.0215142	0.0137749	0.0105963	0.02243	0.03	0.05	0.02	0.03	0.09	0.23
Huu		0.571429	101.686	320.8	1370.73	3444.12	4827.27	7041.94	219.114	1042.82	2073.38	1312.12	2019.36	6939.1	0.120353	0.165127	0.0726259	0.0277286	0.021854	0.0768943	66.8	87.3714	122.735	170.088	193.333	226.774	20.5714	34.6471	47.3529	22.697	31.129	159.484	0.0288793	0.038075	0.0266718	0.0119968	0.010888	0.0225246	0	0.0285714	0	0.0285714	0.0571429	0.114286
Kien		0.545454	106.758	348.219	1447.6	3203.45	4400	6541.67	241.219	1086.17	1752.38	1138.46	1920.83	6438.25	0.124922	0.160194	0.0633716	0.0275163	0.0216723	0.0757884	66.0606	91.1562	129.8	165.31	189.231	216.458	25.0312	37.3667	35.5517	22.5769	23.75	151.208	0.0348018	0.0390267	0.0196716	0.0122479	0.0084531	0.0222511	0.030303	0.0606061	0.030303	0.0909091	0.0606061	0.272727
Nhut		0.5	103.5	376.531	1530.87	3793.1	5192.86	7745.83	273.031	1154	2266.59	1371.43	2441.67	7641.08	0.141174	0.161387	0.0707143	0.0255113	0.027332	0.0785498	67.2188	90.3438	129.387	172	195.893	229.792	23.125	39.0645	42.8621	23.6429	31.6667	162.375	0.032334	0.041221	0.0232274	0.0120527	0.0110874	0.0227313	0	0.03125	0.03125	0.03125	0.125	0.25
PIT Tagged
No		0.51	101.34	348.897	1394.86	3282.02	4623.26	7157.14	247.433	1037.12	1878.21	1295.29	2294.8	7055.75	0.130721	0.157225	0.067005	0.0269129	0.027782	0.0776008	66.52	87.7835	134.772	164.775	190.849	223.896	21.1443	46.2935	38.4832	25.6	29.7403	157.182	0.0298896	0.0433452	0.0215142	0.0137749	0.0105963	0.02243	0.03	0.05	0.02	0.03	0.09	0.23
Yes		0.54	103.94	347.677	1447.26	3478.26	4817.24	7103.8	243.687	1092.79	2033.1	1279.31	2117.72	7000.2	0.12856	0.162349	0.0691062	0.0269515	0.023463	0.0770613	66.69	89.5556	127.137	169.185	192.931	224.557	22.8384	36.9474	42.2174	22.9655	29.0506	157.848	0.0319103	0.0394022	0.0233795	0.0120898	0.0102089	0.0225043	0.01	0.04	0.02	0.05	0.08	0.21
Total		0.525	102.64	348.281	1421.48	3381.77	4720.81	7130.13	245.541	1065.4	1956.94	1287.21	2205.13	7027.62	0.129629	0.159828	0.068073	0.0269324	0.0255948	0.0773276	66.605	88.6786	130.893	167.017	191.896	224.231	22	41.5455	40.3812	24.2674	29.391	157.519	0.0309103	0.041342	0.0224623	0.0129226	0.0104001	0.0224676	0.02	0.045	0.02	0.04	0.085	0.22

## Sheet: Growth_curves
Days	bw_1st	bw_5th	bw_25th	bw_50th	bw_75th	bw_95th	bw_99th
0	74.5	78	92	100	114.5	129.5	138.5
64	92	158	294.5	356	415	486	568
125	640	945	1222	1415	1652	1910	2072
211	1400	1700	2800	3200	4000	5300	6200
283	1100	1800	3400	4600	5800	8200	9100
376	1400	2500	5000	7000	8900	13000	15000
Days	svl_1st	svl_5th	svl_25th	svl_50th	svl_75th	svl_95th	svl_99th
0	58	60.5	64	66	69	73	75
64	68	73	84	90	94	100	102
125	98	108	120	128	135	141	146
211	130	139	159	168	177	190	196
283	140	150	180	195	205	225	230
376	160	180	207.5	230	240	265	275
Days	bmi_1st	bmi_5th	bmi_25th	bmi_50th	bmi_75th	bmi_95th	bmi_99th
0	0.25	0.29	0.31	0.34	0.38	0.43	0.51
64	0.27	0.36	0.44	0.49	0.54	0.61	0.66
125	0.5	0.59	0.63	0.69	0.74	0.85	0.96
211	0.4	0.56	0.66	0.7	0.75	0.85	1.09
283	0.38	0.47	0.57	0.64	0.7	0.77	0.82
376	0.33	0.44	0.53	0.6	0.66	0.75	0.78
